# Supplementary material
Source: MDPI journal article supplement (https://www.mdpi.com/2071-1050/15/14/11446)
Supplement: s1 [file s1]

A

a

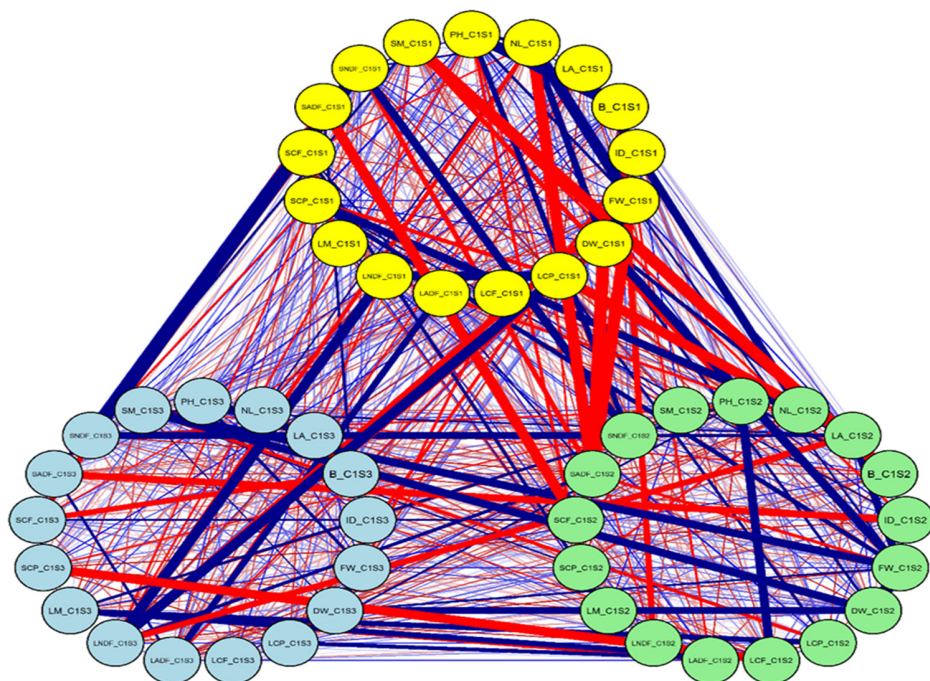

b

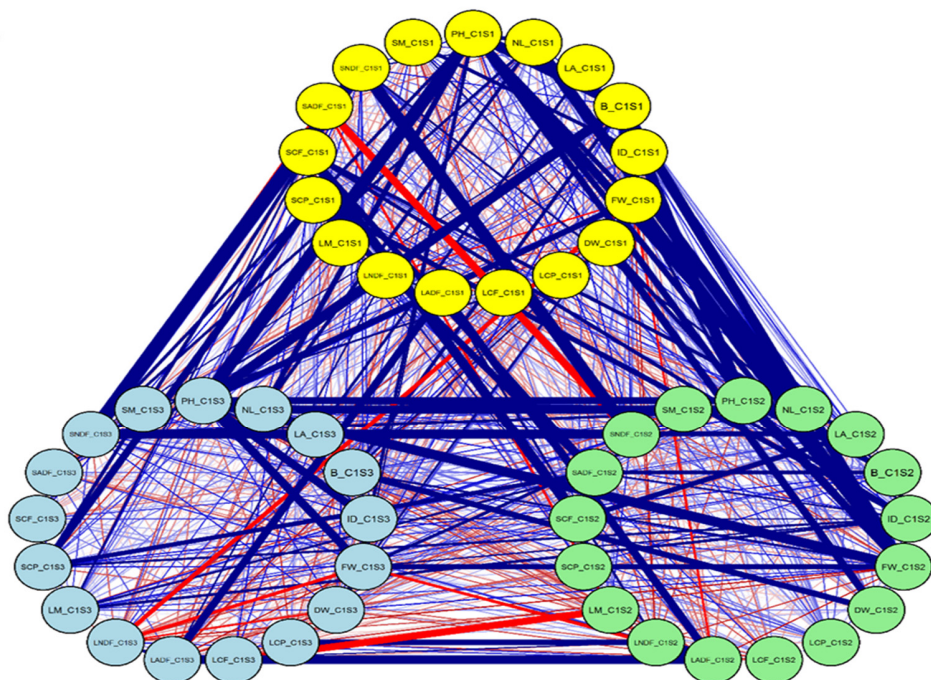

**B**

**a**

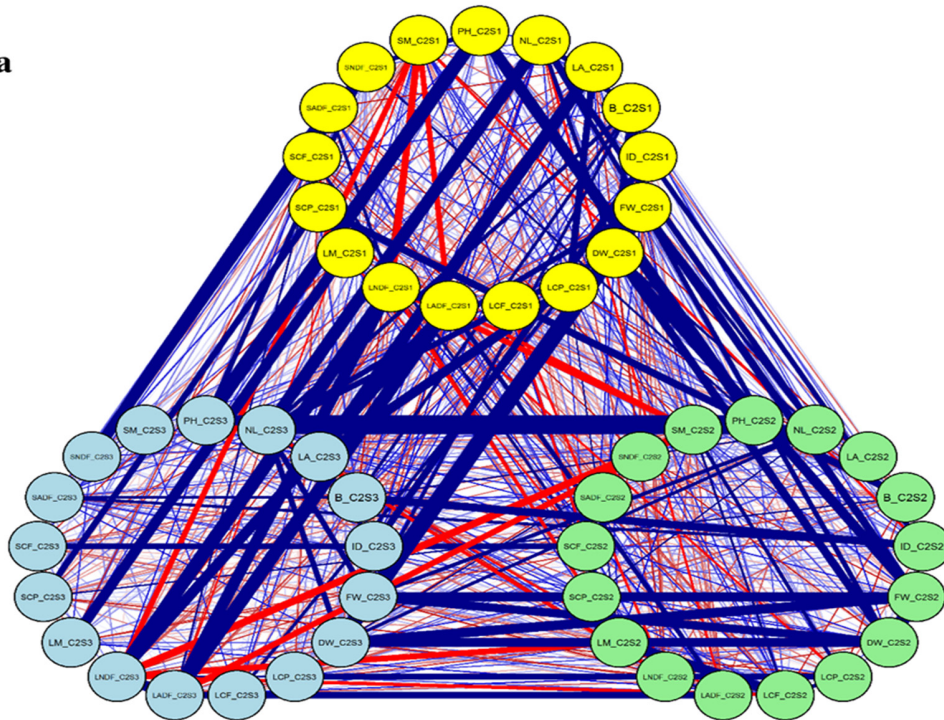

**b**

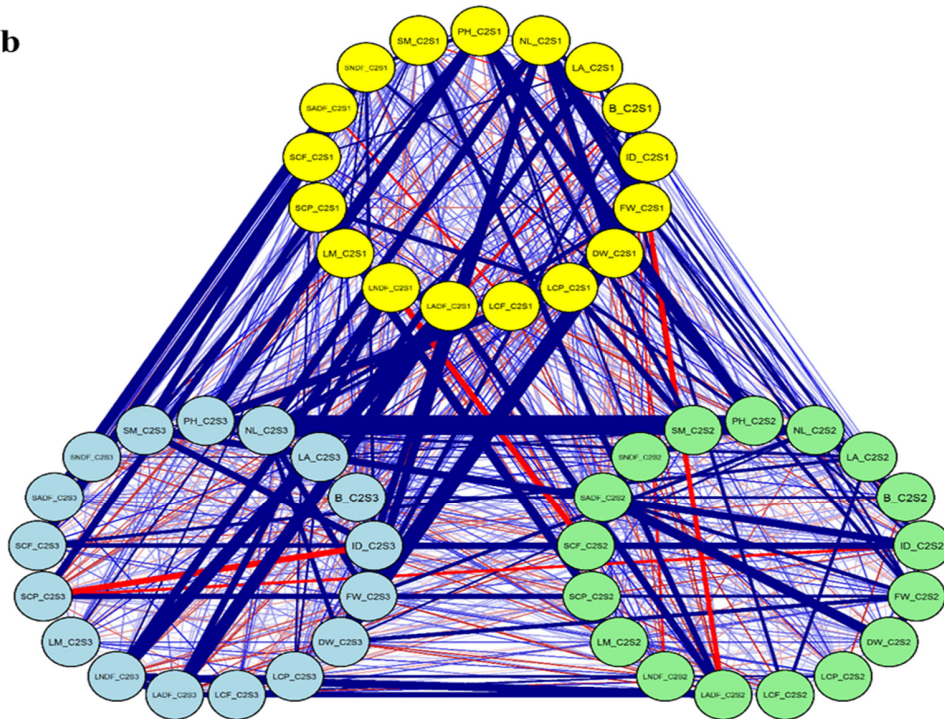



C

a

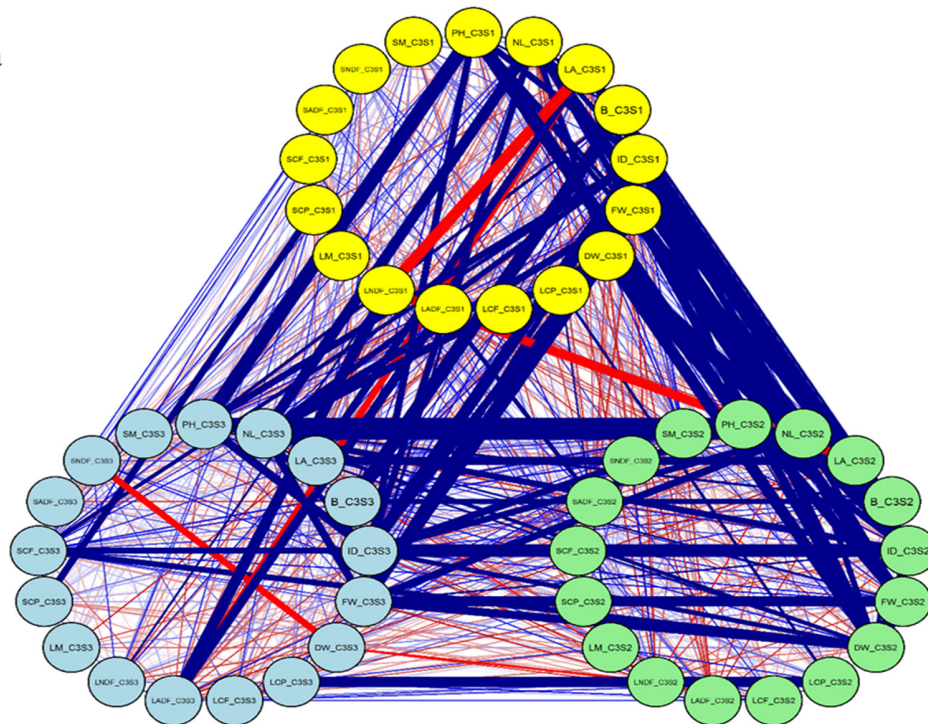

b

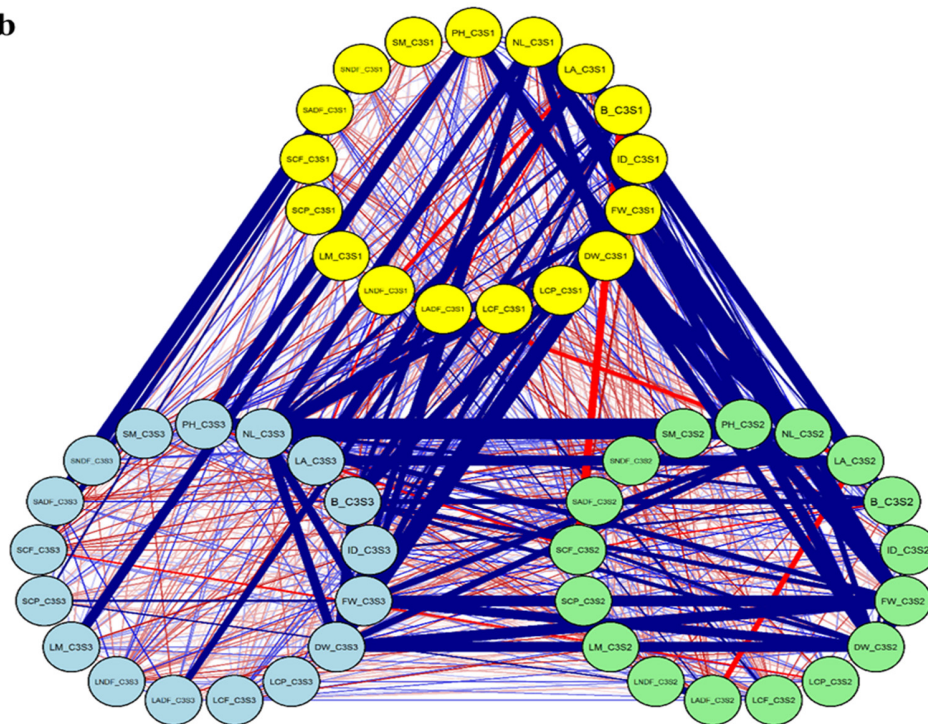

**Supplementary Figure S4:** Correlations among matrixes of various traits under different cuts and spacing levels. Subplots are grouped by cuttings: first plot (A) shows the correlation between traits under cutting level 1 and all spacing levels during two years, respectively. Second plot (B) shows the correlation at cutting level 2 while, third plot (C) shows the correlation at cutting level 3 (a and b subplots represent Year 1 & Year 2, respectively). Yellow circles in all the subplots represents the traits studied at spacing level 01, Green circles represent the spacing level 2 and Blue circles represent spacing level 3 in all the subplots at respective cutting levels. Thick blue lines: highly significant correlations. Thin blue lines: significant correlations. Thick red lines: highly significant negative correlations. Thin red lines: significant negative correlations.
