# Supplementary material
Source: MDPI journal article supplement (https://www.mdpi.com/2071-1050/15/14/11446)
Supplement: s1 [file s1]

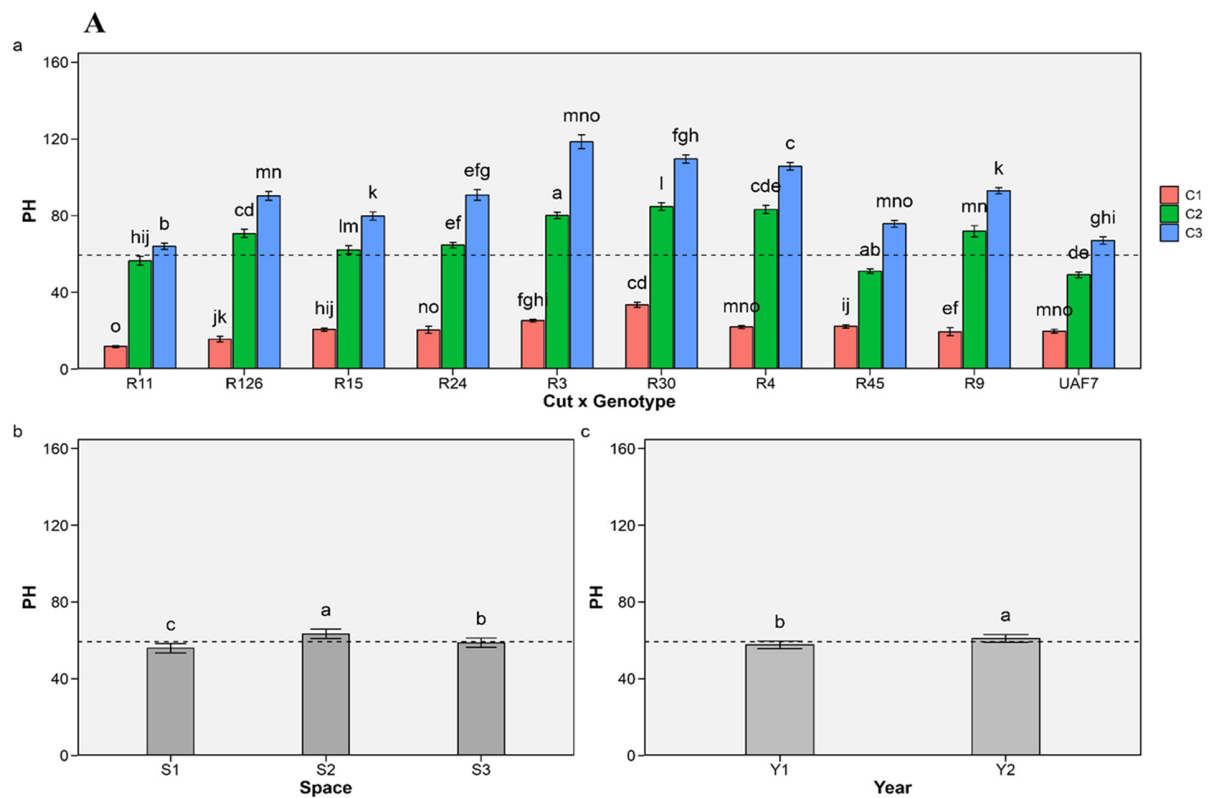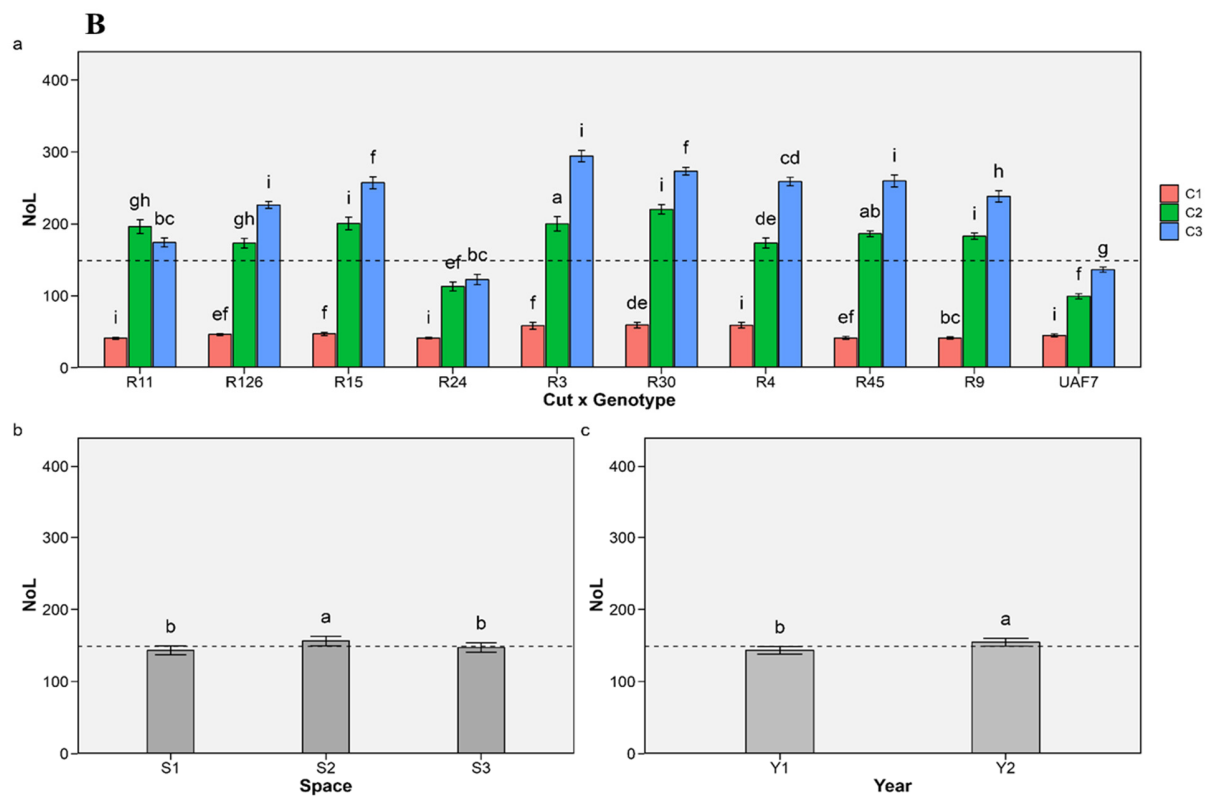

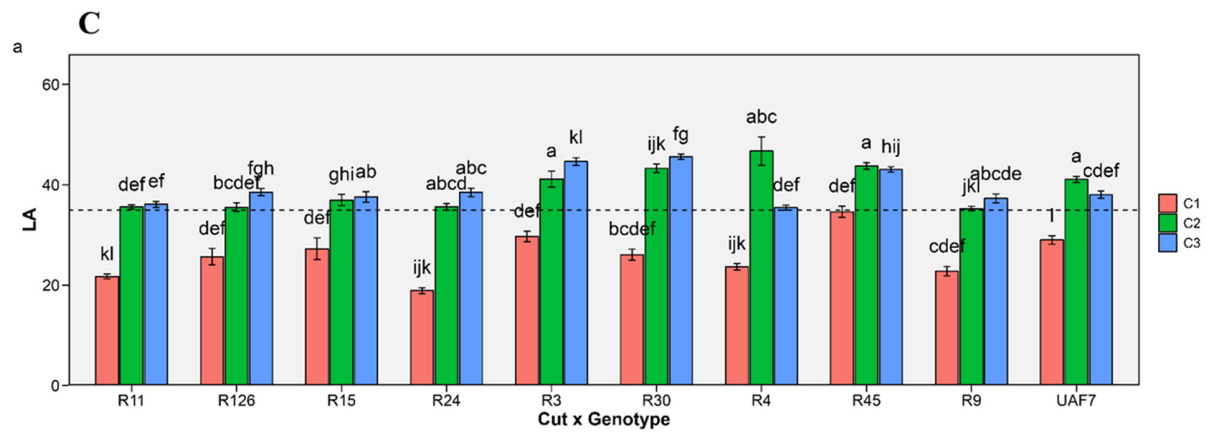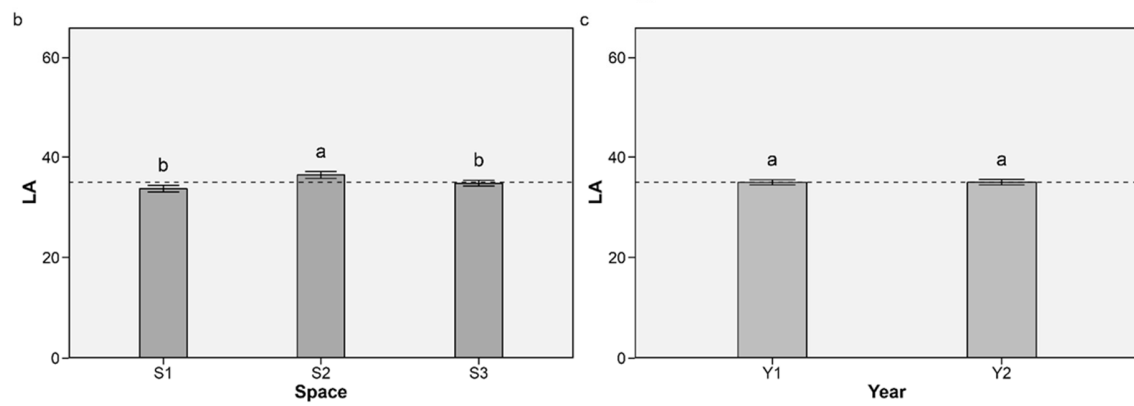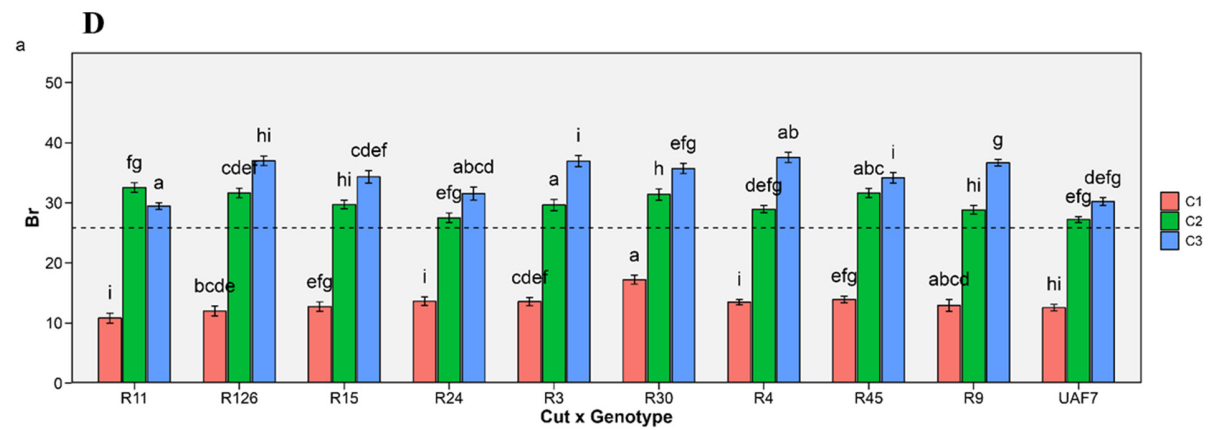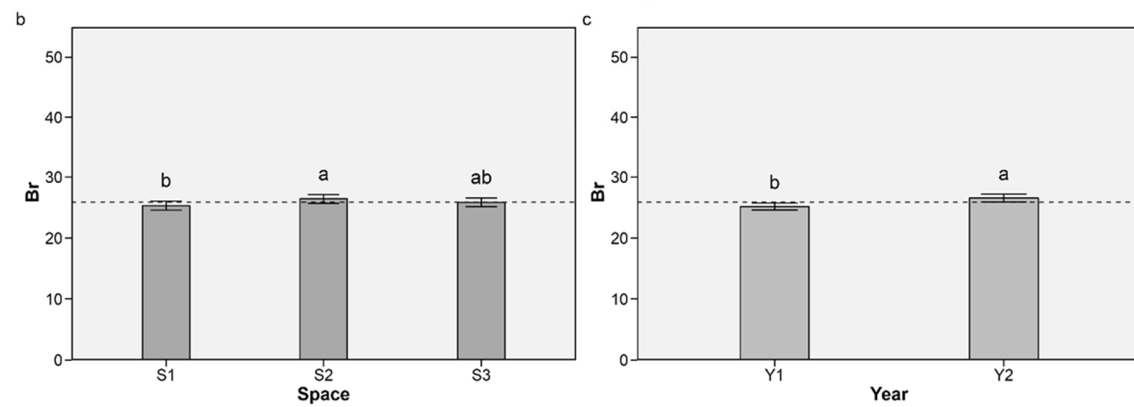

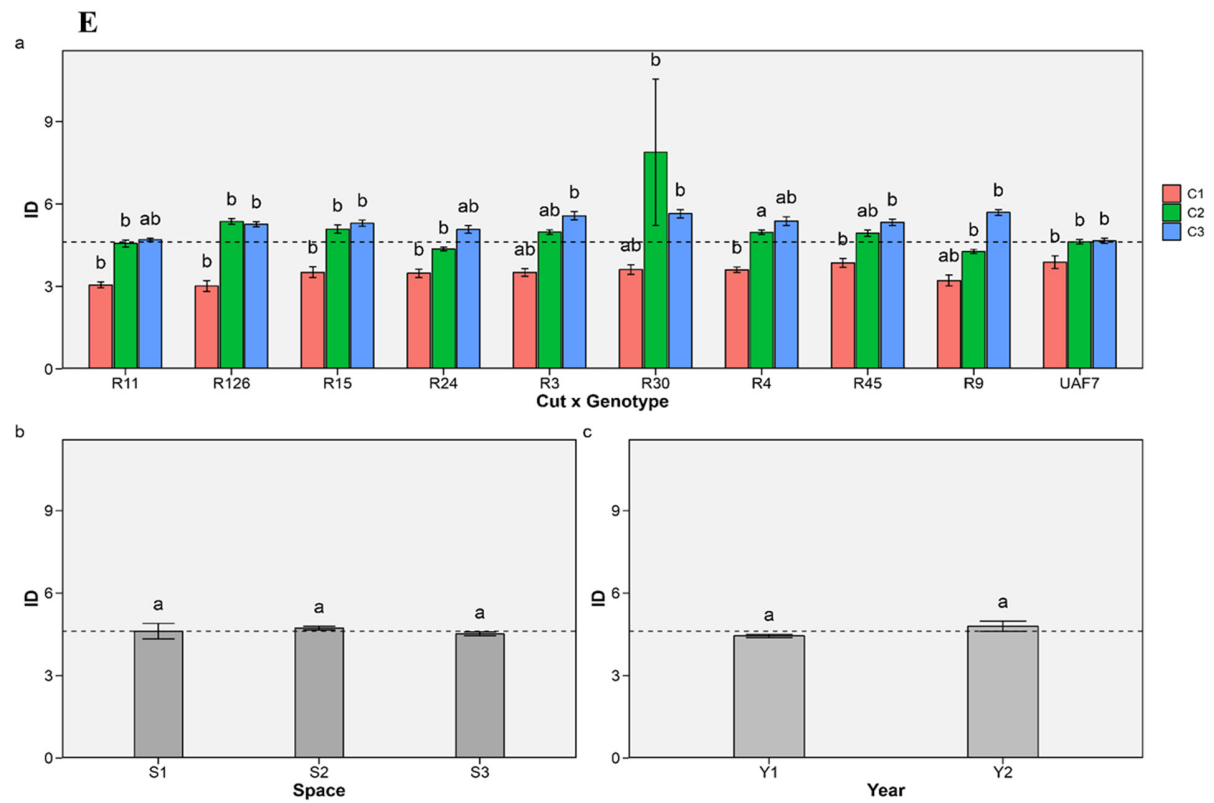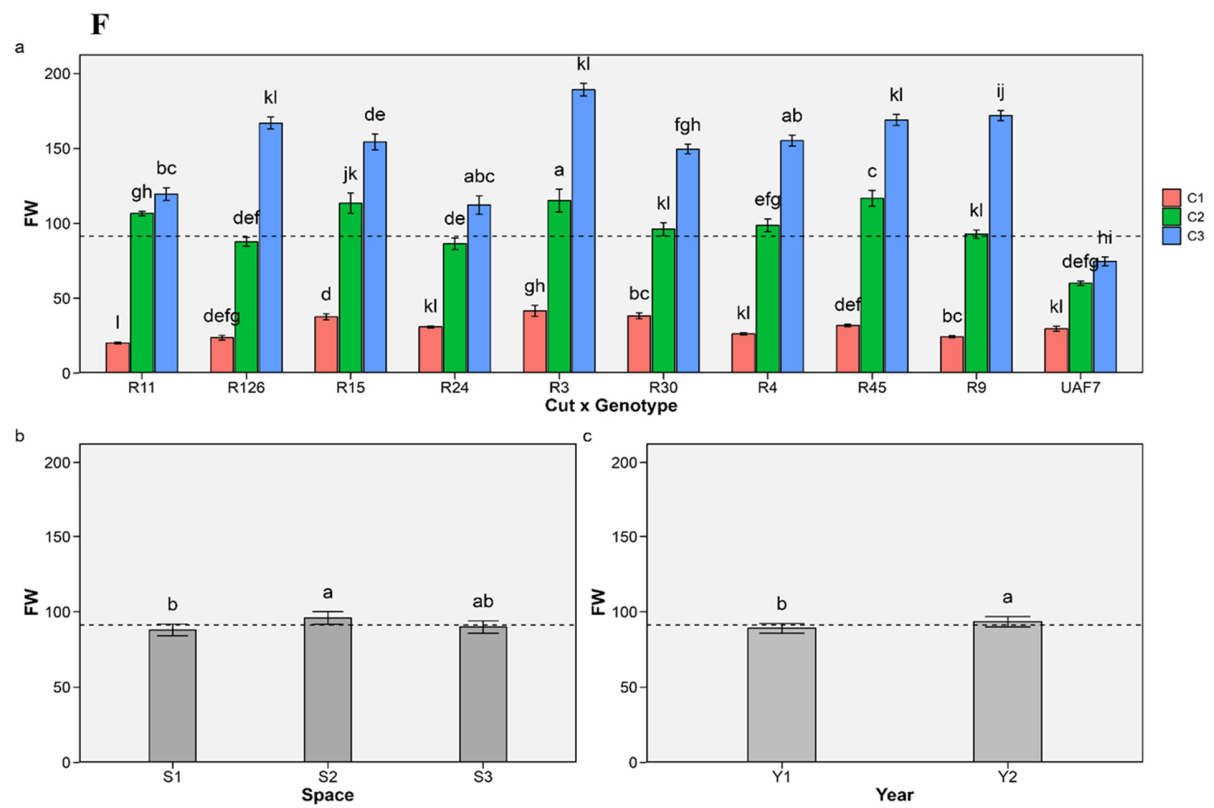

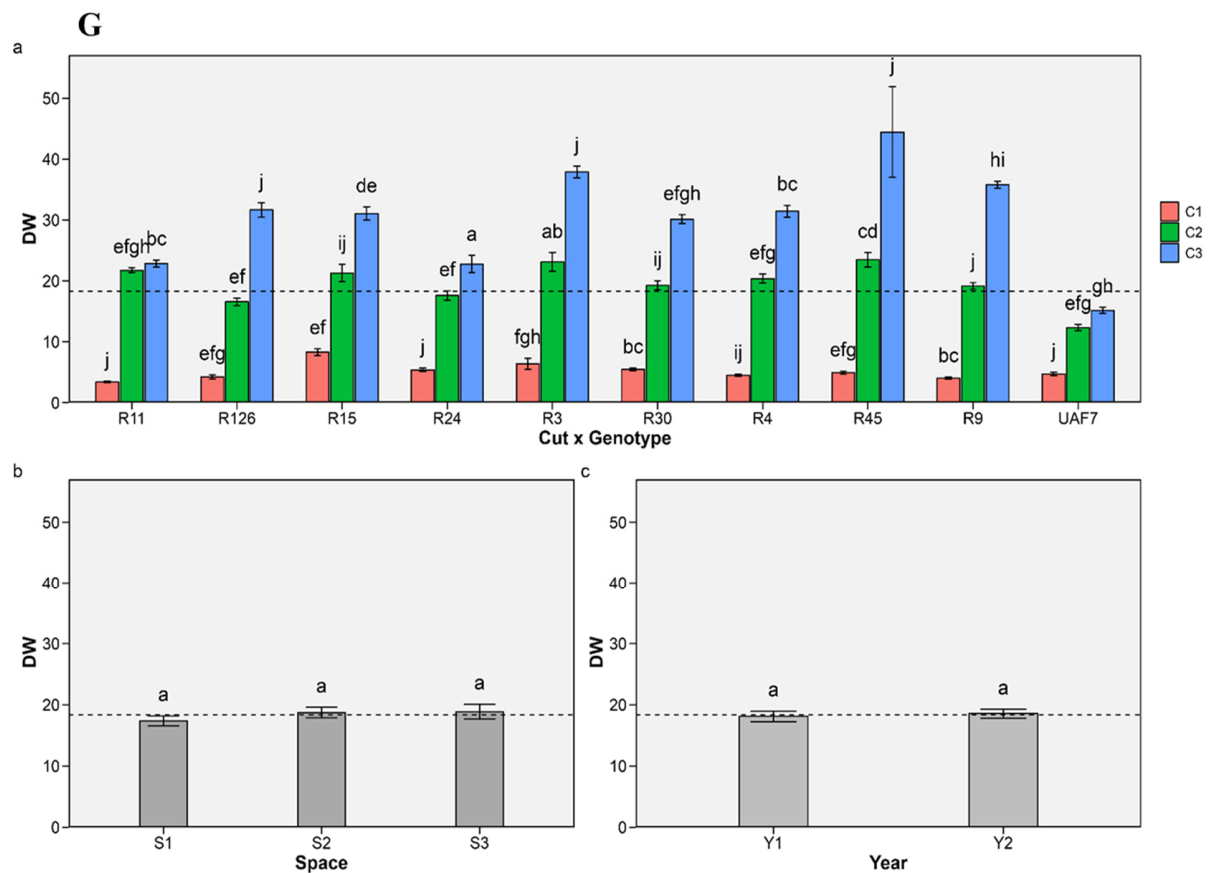

**Supplementary Figure S1:** Morphological Traits of 10 Quinoa genotypes studied during two years at different cutting and spacing levels; A) PH: Plant Height, B) NoL: Number of Leaves, C) LA: Leaf Area, D) Br: No. of branches per plant, E) ID: Internodal distance, F) FW: Fresh Weight, G) DW: Dry Weight. The sub-plots (a, b, c) show the response of genotypes to cuttings (a), spacing effect (b) and years (c), respectively. Means are plotted with standard error bars and the letters indicate the Tukey's post-hoc results. Means which share the same letters are not significantly different at  $p < 0.05$ . Dotted horizontal line in the plot represent the overall mean of the variable under study.
