# Supplementary material
Source: MDPI journal article supplement (https://www.mdpi.com/2071-1050/15/14/11446)
Supplement: s1 [file s1 › Supplementary Table S1.xlsx]

## Sheet: Sheet1
	Supplementary Table S1: Split-Split Plot ANOVA of both Years (2018-19 & 2019-20) for all Traits of 10 Quinoa Genotypes tested at different Cuttings and Spacing Levels
	SV	Mean Square
		Df	PH		NoL		LA		Br		ID		FW		DW		LCP		LCF		LADF		LNDF		LMois		SCP		SCF		SADF		SNDF		SMois
			Y1	Y2	Y1	Y2	Y1	Y2	Y1	Y2	Y1	Y2	Y1	Y2	Y1	Y2	Y1	Y2	Y1	Y2	Y1	Y2	Y1	Y2	Y1	Y2	Y1	Y2	Y1	Y2	Y1	Y2	Y1	Y2	Y1	Y2
	Rep	2	37.3975	39.0222	6795.61	285.128	49.5402	39.5074	86.1843	5.26617	0.00548148	8.70667	4267.25	299.73	68.0479	23.1052	0.557961	27.5918	0.314233	2.69829	0.274345	1.97862	2.72509	59.2088	0.39337	0.521506	2.03546	9.53708	0.0105719	0.18727	11.7148	51.9362	19.6194	214.39	6.16191	24.4744
	Cutting (a)	2	100711.563 ***	118959.739***	699281.348***	785728.640***	5202.921***	5820.662***	10213.667***	12013.740***	80.712***	102.426*	281599.734***	328006.303***	13670.298***	15082.826***	940.831***	1469.029***	23.341***	27.354***	643.366**	934.125***	805.563***	1482.974***	594.396***	688.585***	65.858**	666.019***	13.291***	33.935***	234.209**	690.426***	481.187***	480.524*	1134.699***	1148.087***
	Ea	4	15.1912	104.217	1458.05	321.122	63.4589	8.57284	25.9037	12.7618	0.482481	9.67743	770.463	226.513	43.0539	9.28237	4.55753	9.1036	0.309288	0.056637	13.2578	4.17951	0.700189	17.8197	0.244648	1.84505	1.717	6.02538	0.0948469	0.393338	4.08097	5.96276	4.77122	29.3744	0.622711	1.03634
	Spacing (b)	2	1349.98***	1212.992***	3142.803**	5057.155*	174.336**	163.573***	18.0656	43.0768	4.489**	5.07527	1660.608*	1465.079*	145.701	40.5395	36.806***	30.167*	1.066**	0.52384	10.603*	11.9831	7.87506	0.668463	5.415**	7.166**	1.63748	8.54516	1.173**	0.423768	0.4527	7.042*	21.684**	2.14562	6.078*	0.666196
	Spacing : Cutting (ab)	4	19.8302	34.5618	1422.470*	890.313	50.5376	29.0524	9.5717	7.46817	1.989*	11.2036	527.729	307.601	185.847*	19.9803	3.40776	3.56641	0.0586604	0.0463026	2.96341	0.974657	4.42406	8.07538	0.958481	1.50041	0.151197	4.57751	0.0721669	0.0319189	1.49539	3.919*	4.07511	1.1773	0.989306	0.572728
	Eb	12	28.8184	58.2438	339.915	872.067	15.8273	12.1137	15.9427	18.606	0.409704	8.859	361.981	314.552	49.8108	14.344	1.44357	6.33253	0.100031	0.146483	1.75874	3.98979	2.22932	2.96949	0.501778	0.923155	0.744028	3.78753	0.139322	0.172004	4.30569	1.18036	3.0588	2.51401	1.0662	0.588219
	Genotypes (c.)	9	3345.123 ***	3849.328***	26915.053***	32161.988***	272.505***	351.217***	58.895***	73.488***	1.292***	13.6704	7530.814***	8118.379***	551.897***	299.083***	12.097***	10.522*	0.0630209	0.0251327	108.261***	111.095***	104.617***	51.593***	2.280***	5.835***	3.744***	9.3489***	0.265**	0.639***	10.213**	7.514***	43.780***	53.674***	2.098*	0.900988
	Genotypes : Cutting (ac)	18	532.383***	694.410***	7967.833***	8959.979***	98.247***	98.225***	40.435***	47.933***	0.993***	9.83169	2723.017***	3365.938***	275.035***	140.766***	9.753***	4.85708	0.0841938	0.0908386	12.486***	21.171***	13.514***	26.304***	1.855***	1.910**	1.59758	10.302***	0.304***	0.327**	7.215**	14.725***	18.956***	23.067***	1.925*	0.888411
	Genotypes : Spacing (bc)	18	55.537***	28.7464	843.388**	769.887	36.651**	19.2485	13.7899	10.5084	0.122412	8.51591	191.567	169.645	168.651***	13.3507	2.10562	4.46762	0.0711711	0.0258194	13.898***	7.856*	8.293***	9.47471	1.076*	1.24159	0.633391	1.70392	0.145002	0.0781237	6.924**	4.149**	9.921***	5.081*	0.745129	0.399335
	Genotypes : Cutting : Spacing (abc)	36	37.183**	38.2035	389.116	512.06	27.203**	22.213*	7.32623	9.54228	0.256**	9.51422	120.889	133.944	171.288	6.56781	1.5787	3.26464	0.0677254	0.0623038	2.42605	2.69203	4.595*	6.01962	0.663276	0.557742	1.30822	1.52458	0.0754908	0.0606712	3.31003	1.82323	2.90439	2.3419	1.17811	0.430899
	Ec	162	20.1937	87.0685	340.105	632.549	14.9099	14.7387	8.76171	8.94066	0.143309	8.63828	197.766	238.411	43.9224	10.0062	1.69563	4.21565	0.05817	0.107053	3.14645	3.85262	2.72143	6.9132	0.528765	0.929381	1.0149	2.16643	0.0882244	0.135856	3.20141	1.79694	2.79307	2.63393	1.07002	0.607681
	Mean		57.67	61.02	143.4	154.5	34.95	34.97	25.15	26.55	4.44	4.79	89.11	93.54	18.09	18.55	17.75	18.1	4.72	4.69	21.89	22.18	29.52	28.99	11.21	11.21	12.39	13.68	4.37	4.45	23.93	24.11	34.58	34.03	12.62	12.29
	CV		6.758	16.73	26.6	11.6	22.78	8.37	20.231	13.45	15.6	64.95	31.12	16.09	36.26	16.42	12.03	16.66	11.81	5.08	16.6	9.22	2.83	14.55	4.41	12.12	10.58	17.94	7.03	14.08	8.44	10.13	6.32	15.93	6.25	8.28
			PH: Plant Height, NoL: Number of Leaves, LA: Leaf Area, Br: No. of branches per plant, ID: Internodal distance, FW: Fresh Weight, DW: Dry Weight, LCP: Leaf Crude Protein, LCF: Leaf Crude Fat, LADF: Leaf Acid Detergent Fibre, LNDF: Leaf Neutral Detergent Fibre, LMois: Leaf Moisture, SCP: Stem Crude Protein, SCF: Stem Crude Fat, SADF: Stem Acid Detergent Fibre, SNDF: Stem Neutral Detergent Fibre, S…
			Y1: 2018-2019	Y2: 2019-2020
