# Supplementary material
Source: MDPI journal article supplement (https://www.mdpi.com/2071-1050/15/14/11446)
Supplement: s1 [file s1 › Supplementary Table S2.pdf]

**Supplementary Table S2: MANOVA results of 17 traits f 10 Quinoa genotypes evaluated at cutting and spacing levels for two years. Pillai's trace test was used to get a cumulative significance value for the studied main effects and interactions.**

| Source             | Df  | Pillai trace value | approx. f   | NUM df | den df | Pr(>F) |
|--------------------|-----|--------------------|-------------|--------|--------|--------|
| Cut                | 2   | 1.8217751          | 207.4419537 | 34     | 690    | 0.000  |
| Space              | 2   | 0.5090467          | 6.9288909   | 34     | 690    | 0.000  |
| Gen                | 9   | 3.6139511          | 13.8933100  | 153    | 3168   | 0.000  |
| Year               | 1   | 0.4012347          | 13.5597430  | 17     | 344    | 0.000  |
| Cut:Space          | 4   | 0.4130040          | 2.3501953   | 68     | 1388   | 0.000  |
| Cut:Gen            | 18  | 3.8200224          | 5.7967054   | 306    | 6120   | 0.000  |
| Space:Gen          | 18  | 1.5070023          | 1.9453979   | 306    | 6120   | 0.000  |
| Cut:Year           | 2   | 0.7633995          | 12.5283145  | 34     | 690    | 0.000  |
| Space:Year         | 2   | 0.1004934          | 1.0736603   | 34     | 690    | 0.358  |
| Gen:Year           | 9   | 0.8467700          | 2.1504507   | 153    | 3168   | 0.000  |
| Cut:Space:Gen      | 36  | 2.1155238          | 1.4212954   | 612    | 6120   | 0.000  |
| Cut:Space:Year     | 4   | 0.1413671          | 0.7478171   | 68     | 1388   | 0.937  |
| Cut:Gen:Year       | 18  | 1.4748565          | 1.8999587   | 306    | 6120   | 0.000  |
| Space:Gen:Year     | 18  | 0.6921491          | 0.8488538   | 306    | 6120   | 0.972  |
| Cut:Space:Gen:Year | 36  | 1.2067424          | 0.7640871   | 612    | 6120   | 1.000  |
| Residuals          | 360 |                    |             |        |        |        |

Note: Df: degree of freedom, Approx. f: Approximate F-value, NUM df: number of degrees of freedom, Den df: model errors associated degrees of freedom
