# Supplementary material
Source: MDPI journal article supplement (https://www.mdpi.com/2071-1050/15/14/11446)
Supplement: s1 [file s1 › Supplementary Table S3.xlsx]

## Sheet: CORRMAT
Supplementary Table S3: Correlation Matrix for the cutting1 x spacing 1, 2, and 3 during first growing season (year 1) for all the 17 traits of 10 Quinoa genotypes
Note: This file has 2 sheets; the first sheet is correlation matrix and the second sheet contains p-values (<0.05 and <0.01). In p-values: the red ones are significant at <0.05 and green at <0.01).
	PH_C1S1	NoL_C1S1	LA_C1S1	Br_C1S1	ID_C1S1	FW_C1S1	DW_C1S1	LCP_C1S1	LCF_C1S1	LADF_C1S1	LNDF_C1S1	LMois_C1S1	SCP_C1S1	SCF_C1S1	SADF_C1S1	SNDF_C1S1	SMois_C1S1	PH_C1S2	NoL_C1S2	LA_C1S2	Br_C1S2	ID_C1S2	FW_C1S2	DW_C1S2	LCP_C1S2	LCF_C1S2	LADF_C1S2	LNDF_C1S2	LMois_C1S2	SCP_C1S2	SCF_C1S2	SADF_C1S2	SNDF_C1S2	SMois_C1S2	PH_C1S3	NoL_C1S3	LA_C1S3	Br_C1S3	ID_C1S3	FW_C1S3	DW_C1S3	LCP_C1S3	LCF_C1S3	LADF_C1S3	LNDF_C1S3	LMois_C1S3	SCP_C1S3	SCF_C1S3	SADF_C1S3
PH_C1S1
NoL_C1S1	0.684624
LA_C1S1	0.22596	0.466386
Br_C1S1	0.915553	0.601784	0.246954
ID_C1S1	-0.0769772	-0.00336719	0.571508	-0.0646126
FW_C1S1	0.660755	0.881744	0.501955	0.564722	0.00958684
DW_C1S1	0.543453	0.770157	0.3711	0.420115	-0.028394	0.953178
LCP_C1S1	-0.396732	-0.424653	-0.593395	-0.296783	-0.367464	-0.542357	-0.591612
LCF_C1S1	-0.386758	-0.173492	-0.32518	-0.268173	-0.106903	-0.416931	-0.3899	0.37307
LADF_C1S1	-0.228512	-0.379263	-0.621505	-0.212589	-0.350907	-0.601965	-0.512295	0.541529	0.402962
LNDF_C1S1	-0.443837	-0.512101	-0.628888	-0.527347	-0.368061	-0.56251	-0.543832	0.859367	0.345548	0.517969
LMois_C1S1	0.373839	0.482598	0.0370403	0.50653	-0.573261	0.323101	0.140254	0.366195	0.105491	0.0457465	0.0860061
SCP_C1S1	0.548784	0.254413	0.244352	0.320367	0.168672	0.526353	0.611423	-0.708487	-0.4438	-0.437099	-0.395359	-0.378365
SCF_C1S1	-0.214148	-0.63535	-0.18423	-0.152542	0.274636	-0.535035	-0.408386	-0.303985	0.0909073	0.0862697	-0.194742	-0.704403	0.245058
SADF_C1S1	0.180132	0.0977178	0.062272	0.275301	0.3965	-0.154197	-0.168025	-0.0965729	0.0217931	0.46928	-0.324883	-0.127118	-0.209264	0.180706
SNDF_C1S1	0.606326	0.638745	-0.0257422	0.3855	-0.315101	0.543999	0.539805	-0.0669627	-0.285506	0.255449	0.00213508	0.359423	0.264373	-0.602142	0.209464
SMois_C1S1	-0.128471	0.215697	0.22327	0.0514214	0.288707	0.127666	0.20946	-0.357825	0.0611601	0.0762786	-0.626342	-0.134494	-0.224939	0.116689	0.630775	-0.0429843
PH_C1S2	0.581426	0.2405	-0.28076	0.380137	-0.464887	0.353065	0.297107	0.0140268	-0.318861	-0.261722	0.18898	0.260748	0.482149	-0.1989	-0.52212	0.360849	-0.719942
NoL_C1S2	0.247037	0.316195	0.806038	0.19233	0.637676	0.22728	0.027692	-0.250152	-0.156798	-0.399606	-0.20827	0.0331985	0.150086	-0.212734	0.107819	0.0208047	-0.175201	-0.114785
LA_C1S2	0.41476	0.337978	0.457112	0.267142	0.0603112	0.600554	0.695416	-0.877874	-0.561012	-0.479347	-0.667169	-0.260903	0.822276	0.182438	-0.159075	0.229736	0.131967	0.201709	0.075773
Br_C1S2	0.349099	-0.0588696	-0.0335403	0.217357	-0.170115	-0.086023	-0.252463	0.240835	-0.0498336	-0.0956443	0.420902	0.25629	0.202847	-0.0911102	-0.399609	0.066967	-0.916863	0.669271	0.399696	-0.134827
ID_C1S2	0.120981	-0.114422	-0.0685836	-0.21829	-0.137459	0.134798	0.216228	-0.149396	-0.499172	-0.145163	0.290976	-0.325639	0.637825	-0.00579229	-0.50488	0.306799	-0.654185	0.586264	0.0531822	0.454666	0.458954
FW_C1S2	0.297166	0.332905	0.0760801	0.111443	-0.195832	0.645864	0.824528	-0.520583	-0.445045	-0.251552	-0.306075	-0.161567	0.720416	-0.108302	-0.277663	0.471184	0.0778548	0.302434	-0.269448	0.793783	-0.265819	0.536708
DW_C1S2	0.0959591	0.141727	-0.206391	-0.0678852	-0.36091	0.442589	0.660832	-0.202366	-0.278313	0.00620044	-0.00283321	-0.120089	0.514477	-0.157587	-0.307468	0.466055	0.0223915	0.261231	-0.481216	0.543763	-0.297897	0.512476	0.931663
LCP_C1S2	0.258092	-0.168793	-0.38488	0.42665	-0.412782	-0.20814	-0.355503	0.661449	0.0839461	0.225088	0.419018	0.606577	-0.309066	-0.158585	-0.0809455	-0.0160764	-0.471582	0.401528	-0.112173	-0.52527	0.54373	-0.170004	-0.416385	-0.278145
LCF_C1S2	0.331876	-0.0601549	-0.548389	0.204001	-0.293057	0.0653162	0.0556913	0.214319	-0.352107	-0.123566	0.275927	0.000369242	0.256678	0.00715942	-0.287713	0.143356	-0.522074	0.816349	-0.352002	-0.0674431	0.412416	0.421195	0.125444	0.170568	0.446439
LADF_C1S2	-0.534121	-0.308939	-0.167367	-0.642264	0.121795	-0.431428	-0.283836	0.0718398	0.0219929	0.575857	0.191574	-0.466103	-0.285171	0.12019	0.432774	0.12959	0.38537	-0.563735	-0.16956	-0.103493	-0.48754	0.0692931	-0.014713	0.102416	-0.543641	-0.350885
LNDF_C1S2	-0.627395	-0.318883	0.0183724	-0.745892	-0.146251	-0.406576	-0.377749	0.314357	0.29513	0.297009	0.563123	-0.0492258	-0.328694	-0.183429	-0.310789	-0.0601393	-0.275897	-0.27061	0.157404	-0.215965	0.143704	0.275494	-0.171199	-0.0408689	-0.259763	-0.449057	0.510756
LMois_C1S2	0.304561	-0.249358	-0.0240989	0.211621	0.233143	-0.0921902	-0.0965614	-0.417709	-0.371756	-0.359987	-0.238695	-0.488616	0.588065	0.675876	-0.103001	-0.305866	-0.339414	0.456146	0.0688197	0.367569	0.407353	0.388163	0.0312375	-0.14939	0.0382751	0.525447	-0.309383	-0.418005
SCP_C1S2	-0.667122	-0.633041	-0.360211	-0.614508	-0.133631	-0.368788	-0.10691	-0.00697155	0.0899462	0.16537	0.106317	-0.529953	0.00848037	0.498891	-0.218378	-0.426979	0.245137	-0.328325	-0.649257	0.165294	-0.533393	0.113817	0.336353	0.484435	-0.33295	-0.111728	0.388701	0.195889	-0.00822945
SCF_C1S2	-0.101836	-0.0234538	-0.0850728	-0.14964	-0.203998	0.257067	0.32913	-0.0842733	0.166617	-0.534109	0.112685	-0.0408858	0.376617	0.012933	-0.86328	-0.292443	-0.406006	0.433573	-0.193511	0.229593	0.188689	0.314619	0.382363	0.388834	-0.0199313	0.262196	-0.551603	0.00670552	0.175256	0.309653
SADF_C1S2	-0.508081	-0.884505	-0.308494	-0.334962	0.142241	-0.903981	-0.914911	0.432442	0.235761	0.325192	0.374193	-0.29989	-0.40039	0.634775	0.106504	-0.720815	-0.180065	-0.280195	-0.0712228	-0.498404	0.199646	-0.170809	-0.676989	-0.555607	0.365047	0.0132577	0.123411	0.158438	0.321023	0.284989	-0.175726
SNDF_C1S2	0.727047	0.457245	0.10132	0.458098	-0.0961791	0.345858	0.272539	-0.186871	-0.344256	0.162783	0.00112608	0.169172	0.46199	-0.281997	0.207983	0.80784	-0.35728	0.496167	0.348905	0.277452	0.496492	0.486254	0.236674	0.132684	0.068477	0.217225	-0.0017303	-0.0427328	0.156281	-0.620017	-0.333668	-0.409506
SMois_C1S2	-0.122557	-0.307054	0.237111	0.0106754	0.587513	-0.104855	-0.095374	-0.344038	-0.442592	-0.459683	-0.470227	-0.536702	0.133727	0.566941	0.171274	-0.599493	0.306009	-0.221721	0.0572551	0.195587	-0.27479	-0.124719	-0.0834479	-0.226723	-0.147549	0.139078	-0.0554679	-0.477307	0.569831	0.260283	-0.0488095	0.388159	-0.439595
PH_C1S3	0.492788	0.266137	0.439996	0.591935	-0.243674	0.380126	0.305711	-0.23957	-0.313893	-0.0914945	-0.34591	0.497437	0.254205	-0.163292	-0.0239392	0.26657	-0.0343111	0.0843362	0.230947	0.454648	0.179267	0.0264651	0.280852	0.166397	0.271771	-0.282774	-0.376792	-0.115384	-0.0775992	-0.190596	-0.0753845	-0.194566	0.305206	-0.157458
NoL_C1S3	0.438446	0.637609	0.570467	0.449529	-0.0388436	0.472212	0.343289	-0.422885	-0.417382	-0.137391	-0.594136	0.422408	-0.0464504	-0.376351	0.353783	0.441653	0.405932	-0.118249	0.31996	0.356266	-0.169806	-0.200288	0.0778852	-0.129178	-0.195407	-0.338122	0.0876822	-0.0794323	-0.20948	-0.460841	-0.534596	-0.461551	0.369505	-0.0641082	0.489177
LA_C1S3	0.248826	0.141555	0.551699	0.382587	0.0223572	0.369401	0.398139	-0.570524	-0.286133	-0.306739	-0.634865	0.0847764	0.394514	0.182305	-0.0345328	-0.0656028	0.282121	-0.182921	0.126484	0.690564	-0.196079	-0.0477374	0.43676	0.264399	-0.134837	-0.448264	-0.267689	-0.1873	0.0582436	0.197775	0.104341	-0.155645	-0.0595024	0.199341	0.825202	0.369327
Br_C1S3	0.109754	-0.0395349	0.183068	0.359391	0.133207	-0.16777	-0.24394	0.226565	0.0874218	0.450255	-0.10719	0.323846	-0.369477	-0.0444389	0.655782	0.0840224	0.361758	-0.522889	0.199286	-0.261854	-0.158344	-0.543803	-0.326529	-0.276291	0.367077	-0.474294	0.0813202	-0.117457	-0.373671	-0.186949	-0.645384	0.248686	0.0515023	-0.0227028	0.520661	0.288784	0.346994
ID_C1S3	-0.141618	-0.216019	0.269745	-0.10781	0.0660507	-0.105471	-0.0186312	-0.0434394	-0.0593321	0.357486	0.014693	-0.0760726	0.0849202	0.0541073	0.195572	0.142821	0.135584	-0.466453	0.168827	0.237544	-0.153443	0.119699	0.236107	0.2848	-0.132574	-0.622301	0.344695	0.375386	-0.330778	0.282573	-0.262022	0.0796127	0.121241	-0.174488	0.587184	0.107733	0.580429	0.599508
FW_C1S3	0.195151	0.18528	0.248619	0.169768	-0.354274	0.359923	0.391427	-0.1899	-0.661186	0.0073222	-0.225187	0.269678	0.146441	-0.30665	-0.0370066	0.448485	0.133472	0.0299695	-0.0868234	0.51603	-0.18138	0.287409	0.538622	0.498628	-0.0675106	-0.132312	0.164804	0.076178	-0.228163	0.131406	-0.221137	-0.344378	0.249362	-0.0723948	0.674761	0.585508	0.572008	0.241379	0.530796
DW_C1S3	-0.0374396	0.129138	-0.147258	-0.0414767	-0.600112	0.31566	0.452319	0.0895127	-0.211215	0.20398	0.0672721	0.322335	0.0158836	-0.409201	-0.218049	0.449173	0.157629	0.0199492	-0.487455	0.286919	-0.368496	0.179535	0.652777	0.785338	-0.0333076	-0.09875	0.161938	0.144594	-0.544464	0.408878	0.115305	-0.44206	-0.00531622	-0.371609	0.431215	0.179451	0.374662	0.111238	0.46149	0.767861
LCP_C1S3	0.0830112	-0.14508	-0.511503	0.036817	-0.670593	0.098074	0.133623	0.421839	-0.377907	0.00145404	0.430092	0.309872	0.0524548	-0.27857	-0.544522	0.204547	-0.487526	0.648887	-0.525491	-0.0178727	0.250699	0.444061	0.33823	0.494813	0.511226	0.703998	-0.26656	-0.105678	0.0439194	0.19084	0.355749	-0.0643591	0.0285077	-0.114939	0.118457	-0.232958	-0.100987	-0.259628	-0.153059	0.3915	0.54067
LCF_C1S3	-0.0679795	-0.394896	0.123983	0.138896	0.0736577	-0.02074	-0.00157009	0.00784243	-0.383654	-0.318712	-0.138248	-0.0556716	0.146389	0.280831	-0.241305	-0.454006	-0.0564184	-0.0153439	-0.0851356	0.195741	-0.0196887	0.0335602	0.148656	0.14399	0.33222	0.109948	-0.390787	-0.313505	0.261566	0.380172	0.266634	0.353055	-0.416037	0.576205	0.433533	-0.222817	0.56686	0.243808	0.290399	0.313977	0.210334	0.389722
LADF_C1S3	-0.464942	-0.527638	-0.634444	-0.302499	-0.0888282	-0.636512	-0.504142	0.496532	0.33233	0.762879	0.302039	-0.185761	-0.558317	0.290861	0.536373	-0.1416	0.431306	-0.496452	-0.595821	-0.535389	-0.509482	-0.431784	-0.286241	-0.0282834	0.143067	-0.0497501	0.551452	-0.0263502	-0.27852	0.459476	-0.44475	0.471717	-0.36014	0.0824411	-0.349611	-0.291077	-0.297862	0.411944	0.141524	-0.124323	0.129005	0.006545	0.00526253
LNDF_C1S3	-0.643981	-0.698521	-0.426031	-0.557425	-0.190174	-0.778272	-0.800985	0.863604	0.451284	0.504894	0.861917	0.0888227	-0.638744	-0.00944341	-0.186912	-0.3587	-0.424459	-0.182463	-0.0763685	-0.769572	0.307891	-0.0371768	-0.599956	-0.320227	0.45327	-0.0500605	0.197804	0.606972	-0.276803	0.176425	-0.0281943	0.682679	-0.294127	-0.244848	-0.217944	-0.515806	-0.417693	0.189667	0.177453	-0.244631	-0.0627462	0.1833	0.0760305	0.409716
LMois_C1S3	0.487714	0.0764497	-0.373133	0.506785	-0.130688	0.0790134	-0.0386843	0.351517	0.0264908	-0.095056	0.252176	0.295431	0.109599	-0.0836593	-0.125348	0.0645646	-0.517836	0.673059	-0.0438778	-0.336185	0.569265	0.0182627	-0.199966	-0.159756	0.749426	0.756077	-0.684965	-0.558798	0.360733	-0.450048	0.231447	0.0923017	0.208364	-0.0060668	-0.0848948	-0.376099	-0.358832	-0.0691104	-0.532834	-0.419355	-0.326802	0.415218	0.129094	-0.083186	0.0735959
SCP_C1S3	-0.25888	0.151895	0.391504	-0.050658	0.053799	0.0287631	0.0227878	-0.132196	0.598431	0.0136994	-0.269713	0.246276	-0.299037	-0.0518829	0.0623051	-0.249836	0.458944	-0.628172	0.152414	-0.0185486	-0.357692	-0.600465	-0.141745	-0.161623	-0.227656	-0.865351	-0.0175652	0.275395	-0.54012	0.10225	0.0658653	-0.070272	-0.397139	-0.24117	0.288765	0.197593	0.451228	0.359575	0.364892	-0.0514715	0.115358	-0.563466	-0.0660624	-0.00555288	0.0380612	-0.492492
SCF_C1S3	-0.163455	0.157834	0.00809914	-0.286336	-0.141738	0.392119	0.413112	-0.0132991	-0.305053	-0.624422	0.104022	-0.00145352	0.141401	-0.370033	-0.743405	-0.0594389	-0.257025	0.414427	-0.142915	0.160997	0.00139474	0.393926	0.374368	0.367811	-0.175427	0.419794	-0.217562	0.0578484	0.015233	0.164786	0.655521	-0.372386	-0.258539	0.105764	-0.300877	-0.157875	-0.193833	-0.756611	-0.472933	0.0745897	0.217983	0.521825	0.116462	-0.415541	-0.116938	0.0767956	-0.292245
SADF_C1S3	-0.0916914	-0.0123577	-0.266291	0.16665	-0.218419	-0.284441	-0.295488	0.181308	0.30303	0.483579	-0.200276	0.286285	-0.640529	0.103296	0.611719	-0.0690688	0.659807	-0.451642	-0.417471	-0.363696	-0.509205	-0.801591	-0.399888	-0.323049	0.167165	-0.227407	0.241077	-0.232717	-0.311892	0.0449826	-0.555374	0.197239	-0.286505	0.0379374	-0.0271525	0.334699	-0.0278705	0.491059	-0.0916958	0.00216722	0.0533992	-0.200085	-0.15278	0.663731	0.0191489	-0.127365	0.314176	-0.477172
SNDF_C1S3	0.590968	0.574648	-0.140149	0.383839	-0.471156	0.452959	0.406229	0.107333	-0.286758	0.276663	0.148389	0.500123	0.133728	-0.660383	0.101851	0.960399	-0.202721	0.494606	-0.0280337	0.0870025	0.224815	0.316845	0.333374	0.359781	0.177823	0.287111	0.0499214	-0.0243749	-0.27936	-0.494068	-0.276997	-0.620769	0.795911	-0.638668	0.246341	0.425125	-0.182109	0.039577	0.0125342	0.434718	0.420402	0.362743	-0.443545	-0.146778	-0.215762	0.19261	-0.346414	0.00692009	-0.0351526
SMois_C1S3	-0.114709	0.068967	-0.0667731	-0.262963	-0.122473	0.286215	0.542085	-0.469828	-0.273155	0.029229	-0.271945	-0.423718	0.419836	0.112507	-0.0322421	0.285766	0.409237	-0.112782	-0.466203	0.638927	-0.629229	0.341579	0.830061	0.827442	-0.682258	-0.104318	0.466691	0.0329794	-0.096171	0.63857	0.132311	-0.455351	-0.021011	0.0198422	-0.014301	0.0699238	0.29392	-0.286556	0.286132	0.469488	0.623223	0.112231	-0.0139057	0.115882	-0.4584	-0.564529	-0.0183897	0.233477	-0.076592
[truncated: 2 more columns]

## Sheet: P_VALUES
PH_C1S1	NoL_C1S1	LA_C1S1	Br_C1S1	ID_C1S1	FW_C1S1	DW_C1S1	LCP_C1S1	LCF_C1S1	LADF_C1S1	LNDF_C1S1	LMois_C1S1	SCP_C1S1	SCF_C1S1	SADF_C1S1	SNDF_C1S1	SMois_C1S1	PH_C1S2	NoL_C1S2	LA_C1S2	Br_C1S2	ID_C1S2	FW_C1S2	DW_C1S2	LCP_C1S2	LCF_C1S2	LADF_C1S2	LNDF_C1S2	LMois_C1S2	SCP_C1S2	SCF_C1S2	SADF_C1S2	SNDF_C1S2	SMois_C1S2	PH_C1S3	NoL_C1S3	LA_C1S3	Br_C1S3	ID_C1S3	FW_C1S3	DW_C1S3	LCP_C1S3	LCF_C1S3	LADF_C1S3	LNDF_C1S3	LMois_C1S3	SCP_C1S3	SCF_C1S3	SADF_C1S3	SNDF_C1S3
0	0.0289564	0.530186	0.000200727	0.832607	0.03753	0.104457	0.256328	0.269564	0.525424	0.198819	0.287251	0.100427	0.55245	0.618499	0.0631244	0.723562	0.0779024	0.491396	0.23334	0.322804	0.739194	0.404376	0.792012	0.471552	0.348836	0.111754	0.0521651	0.392206	0.0350946	0.779531	0.133776	0.0171997	0.735898	0.147865	0.204979	0.48816	0.762784	0.696349	0.588997	0.918216	0.819659	0.85198	0.17575	0.0444861	0.152731	0.470151	0.651843	0.801103	0.0719995
0.0289564	0	0.174233	0.0656698	0.992634	0.000740063	0.009154	0.221239	0.631705	0.279752	0.130215	0.157733	0.478115	0.0483803	0.788272	0.0468228	0.549508	0.503295	0.373427	0.339495	0.871668	0.752953	0.347252	0.696125	0.641107	0.868886	0.385087	0.369153	0.487199	0.0494595	0.948723	0.000675672	0.18397	0.388146	0.457338	0.0473399	0.696479	0.913653	0.548899	0.608329	0.722175	0.689233	0.258738	0.117008	0.024638	0.83374	0.675289	0.663212	0.972972	0.0822797
0.530186	0.174233	0	0.491545	0.0843603	0.139316	0.291078	0.0705462	0.359235	0.0550906	0.0514404	0.919085	0.496269	0.610399	0.864307	0.943726	0.535224	0.432003	0.00486419	0.184113	0.926713	0.850677	0.834535	0.567265	0.272097	0.100722	0.64397	0.959824	0.947314	0.306564	0.815244	0.385807	0.780624	0.509511	0.203197	0.0850577	0.0982655	0.612692	0.451025	0.488535	0.684768	0.130741	0.732917	0.0488018	0.219583	0.288235	0.263221	0.982284	0.457066	0.699374
0.000200727	0.0656698	0.491545	0	0.859249	0.0889717	0.226744	0.405012	0.453771	0.555415	0.117247	0.135166	0.366803	0.673971	0.441383	0.27126	0.887813	0.278553	0.594499	0.455574	0.546366	0.544601	0.759223	0.852184	0.218841	0.571861	0.0452437	0.0132465	0.557258	0.0587045	0.679895	0.344096	0.183047	0.97665	0.0714185	0.192432	0.275209	0.307747	0.766887	0.639152	0.909426	0.919572	0.70196	0.395582	0.0941068	0.134937	0.88947	0.422517	0.645409	0.273507
0.832607	0.992634	0.0843603	0.859249	0	0.979031	0.937938	0.296202	0.768804	0.320133	0.295358	0.0831949	0.641349	0.442533	0.256633	0.375174	0.418513	0.175807	0.0473093	0.868548	0.638456	0.704926	0.587672	0.305557	0.235803	0.411215	0.737491	0.686832	0.516829	0.712847	0.571865	0.695067	0.791544	0.0741024	0.497502	0.915158	0.951118	0.713725	0.856143	0.315187	0.0666238	0.0338131	0.839745	0.807214	0.598717	0.718952	0.882655	0.696102	0.544358	0.169276
0.03753	0.000740063	0.139316	0.0889717	0.979031	0	1.98692e-05	0.105298	0.230653	0.0655672	0.0905089	0.362494	0.118067	0.111026	0.6706	0.10404	0.725237	0.316957	0.527721	0.0663709	0.813211	0.71043	0.0436654	0.200236	0.563912	0.857729	0.213164	0.243627	0.800039	0.294331	0.473377	0.000330727	0.327624	0.773135	0.278568	0.16819	0.293467	0.643159	0.771832	0.30698	0.374281	0.787515	0.954651	0.0478434	0.00801261	0.828233	0.937133	0.262405	0.425731	0.188643
0.104457	0.009154	0.291078	0.226744	0.937938	1.98692e-05	0	0.0716122	0.265355	0.130045	0.104168	0.699159	0.0603465	0.24133	0.642647	0.107273	0.561386	0.404475	0.93947	0.0255619	0.481611	0.548503	0.00333661	0.0375001	0.313392	0.878552	0.426758	0.281834	0.79073	0.768788	0.353082	0.000206739	0.446165	0.793257	0.390331	0.33147	0.254491	0.497017	0.959258	0.263323	0.189347	0.712863	0.996565	0.137322	0.00535615	0.915505	0.950177	0.235391	0.407163	0.244067
0.256328	0.221239	0.0705462	0.405012	0.296202	0.105298	0.0716122	1.0635e-62	0.288323	0.105937	0.00143908	0.298001	0.0218287	0.393149	0.790706	0.854174	0.310014	0.969322	0.485768	0.000837717	0.502682	0.680393	0.122896	0.575012	0.0372593	0.552124	0.843659	0.376364	0.229694	0.98475	0.816956	0.211969	0.605198	0.330346	0.504997	0.223374	0.0850195	0.529056	0.905155	0.599253	0.805752	0.224644	0.982846	0.144336	0.00128017	0.319233	0.715821	0.970913	0.616171	0.767895
0.269564	0.631705	0.359235	0.453771	0.768804	0.230653	0.265355	0.288323	0	0.248248	0.328086	0.77179	0.19886	0.802776	0.95235	0.423923	0.866712	0.369188	0.665314	0.0915592	0.891259	0.141878	0.197453	0.436196	0.817656	0.318366	0.951914	0.407757	0.290159	0.804827	0.645476	0.511996	0.330019	0.200232	0.377107	0.230097	0.42286	0.81022	0.870667	0.0373617	0.558033	0.281615	0.273759	0.348137	0.190488	0.942092	0.0675917	0.391403	0.394712	0.421804
0.525424	0.279752	0.0550906	0.555415	0.320133	0.0655672	0.130045	0.105937	0.248248	0	0.125124	0.900139	0.206536	0.812683	0.171215	0.476264	0.834108	0.465115	0.252582	0.160964	0.792681	0.689064	0.483247	0.986437	0.531817	0.73379	0.0814877	0.404636	0.306887	0.647985	0.111764	0.359215	0.653198	0.181342	0.801523	0.705067	0.388658	0.191627	0.310506	0.983984	0.5719	0.996819	0.369423	0.0102712	0.136641	0.793934	0.970038	0.0536287	0.156767	0.439034
0.198819	0.130215	0.0514404	0.117247	0.295358	0.0905089	0.104168	0.00143908	0.328086	0.125124	0	0.813247	0.258129	0.589794	0.359699	0.99533	0.0526802	0.601057	0.563663	0.0350773	0.225784	0.414698	0.389738	0.993802	0.228087	0.440304	0.595977	0.090081	0.506602	0.770043	0.756608	0.286758	0.997537	0.170235	0.327546	0.0701063	0.0486058	0.768198	0.967866	0.531632	0.853506	0.214742	0.703297	0.396338	0.00134185	0.482126	0.451082	0.774897	0.57905	0.682452
0.287251	0.157733	0.919085	0.135166	0.0831949	0.362494	0.699159	0.298001	0.77179	0.900139	0.813247	0	0.280985	0.0229517	0.72638	0.307701	0.711058	0.466838	0.927458	0.466563	0.474762	0.358516	0.655654	0.741061	0.0629861	0.999192	0.174529	0.892579	0.151858	0.115114	0.910712	0.399873	0.640346	0.109706	0.143491	0.223953	0.815879	0.361324	0.834551	0.451142	0.363698	0.383578	0.878595	0.607382	0.807226	0.407257	0.492775	0.99682	0.422603	0.141
0.100427	0.478115	0.496269	0.366803	0.641349	0.118067	0.0603465	0.0218287	0.19886	0.206536	0.258129	0.280985	0	0.494985	0.56176	0.460438	0.532096	0.158178	0.678983	0.00350106	0.574084	0.0472413	0.0187663	0.128139	0.384882	0.474069	0.424491	0.353758	0.0737638	0.981451	0.283397	0.251567	0.178876	0.712648	0.478488	0.898609	0.25924	0.29336	0.815571	0.686441	0.965263	0.88557	0.686548	0.0934695	0.0468231	0.763111	0.401281	0.696796	0.0460174	0.712645
0.55245	0.0483803	0.610399	0.673971	0.442533	0.111026	0.24133	0.393149	0.802776	0.812683	0.589794	0.0229517	0.494985	0	0.617363	0.0654672	0.748191	0.581714	0.55514	0.613937	0.802343	0.98733	0.765849	0.663712	0.66169	0.98434	0.74085	0.61198	0.0319242	0.142139	0.971714	0.0486475	0.42989	0.0874466	0.652173	0.283764	0.614199	0.902982	0.881986	0.388801	0.2403	0.435755	0.431881	0.414893	0.979344	0.818271	0.886811	0.292577	0.776436	0.0376757
0.618499	0.788272	0.864307	0.441383	0.256633	0.6706	0.642647	0.790706	0.95235	0.171215	0.359699	0.72638	0.56176	0.617363	6.6469e-64	0.561378	0.0505339	0.121598	0.766869	0.660696	0.252579	0.136653	0.437313	0.387473	0.824087	0.42019	0.211579	0.382098	0.77706	0.544434	0.00129187	0.769646	0.564213	0.636137	0.947663	0.315906	0.924549	0.03951	0.588177	0.919159	0.545057	0.103641	0.501822	0.109966	0.605118	0.73007	0.864235	0.0137275	0.0601873	0.779497
0.0631244	0.0468228	0.943726	0.27126	0.375174	0.10404	0.107273	0.854174	0.423923	0.476264	0.99533	0.307701	0.460438	0.0654672	0.561378	6.6469e-64	0.906145	0.305646	0.954509	0.523146	0.854165	0.388559	0.169247	0.17458	0.964842	0.692773	0.721235	0.86892	0.390079	0.218448	0.412241	0.0186693	0.00469683	0.066979	0.456578	0.201301	0.85711	0.817493	0.693874	0.193595	0.192828	0.570809	0.187495	0.696387	0.308747	0.859352	0.486338	0.870436	0.849631	1.02569e-05
0.723562	0.549508	0.535224	0.887813	0.418513	0.725237	0.561386	0.310014	0.866712	0.834108	0.0526802	0.711058	0.532096	0.748191	0.0505339	0.906145	0	0.018882	0.628298	0.716297	0.000188863	0.0401602	0.830721	0.951043	0.168838	0.121637	0.271435	0.440355	0.337316	0.494841	0.244352	0.618632	0.310805	0.389845	0.925033	0.244447	0.429679	0.304338	0.708802	0.713176	0.663626	0.152913	0.876977	0.213307	0.221472	0.125238	0.182136	0.473452	0.0379023	0.574326
0.0779024	0.503295	0.432003	0.278553	0.175807	0.316957	0.404475	0.969322	0.369188	0.465115	0.601057	0.466838	0.158178	0.581714	0.121598	0.305646	0.018882	0	0.752191	0.576281	0.0342976	0.0748716	0.395689	0.465983	0.250096	0.00396176	0.0896553	0.449518	0.185161	0.354331	0.210643	0.43297	0.144678	0.538134	0.816821	0.744917	0.612982	0.120952	0.174163	0.934501	0.956378	0.042369	0.966443	0.144411	0.613887	0.0329224	0.0517869	0.233753	0.190093	0.146144
0.491396	0.373427	0.00486419	0.594499	0.0473093	0.527721	0.93947	0.485768	0.665314	0.252582	0.563663	0.927458	0.678983	0.55514	0.766869	0.954509	0.628298	0.752191	0	0.835195	0.252466	0.883992	0.451543	0.159102	0.757686	0.318519	0.639569	0.664083	0.850168	0.0422122	0.592193	0.844988	0.323092	0.875164	0.520897	0.367446	0.727701	0.580966	0.641038	0.811499	0.152982	0.118781	0.81511	0.0691127	0.833915	0.904202	0.674232	0.69368	0.229988	0.938724
0.23334	0.339495	0.184113	0.455574	0.868548	0.0663709	0.0255619	0.000837717	0.0915592	0.160964	0.0350773	0.466563	0.00350106	0.613937	0.660696	0.523146	0.716297	0.576281	0.835195	6.6469e-64	0.710369	0.186773	0.00611721	0.10422	0.118964	0.853137	0.776019	0.549002	0.296054	0.648137	0.523413	0.14259	0.437677	0.588147	0.186793	0.312279	0.0270523	0.464881	0.508714	0.126792	0.421531	0.960916	0.587848	0.110745	0.00924047	0.342226	0.959439	0.656807	0.301561	0.811116
0.322804	0.871668	0.926713	0.546366	0.638456	0.813211	0.481611	0.502682	0.891259	0.792681	0.225784	0.474762	0.574084	0.802343	0.252579	0.854165	0.000188863	0.0342976	0.252466	0.710369	0	0.182125	0.457895	0.403165	0.104245	0.23626	0.152899	0.692059	0.242639	0.112337	0.601628	0.580269	0.144373	0.442267	0.620214	0.639075	0.58719	0.662178	0.672135	0.616029	0.294743	0.484783	0.956948	0.132529	0.386786	0.0858672	0.310208	0.996949	0.132774	0.532328
0.739194	0.752953	0.850677	0.544601	0.704926	0.71043	0.548503	0.680393	0.141878	0.689064	0.414698	0.358516	0.0472413	0.98733	0.136653	0.388559	0.0401602	0.0748716	0.883992	0.186773	0.182125	0	0.109701	0.129886	0.638679	0.225427	0.849147	0.44105	0.267678	0.754226	0.375945	0.637068	0.154148	0.731382	0.942148	0.579027	0.895812	0.104189	0.741879	0.420703	0.619683	0.198565	0.92667	0.212744	0.918788	0.960064	0.0664215	0.260015	0.00529532	0.372391
0.404376	0.347252	0.834535	0.759223	0.587672	0.0436654	0.00333661	0.122896	0.197453	0.483247	0.389738	0.655654	0.0187663	0.765849	0.437313	0.169247	0.830721	0.395689	0.451543	0.00611721	0.457895	0.109701	0	8.78089e-05	0.231327	0.729869	0.967822	0.636286	0.931735	0.34197	0.275513	0.0315356	0.510314	0.818723	0.431846	0.830656	0.206929	0.357128	0.511358	0.108196	0.0407393	0.339113	0.681906	0.422677	0.066713	0.579649	0.696087	0.286514	0.252217	0.346532
0.792012	0.696125	0.567265	0.852184	0.305557	0.200236	0.0375001	0.575012	0.436196	0.986437	0.993802	0.741061	0.128139	0.663712	0.387473	0.17458	0.951043	0.465983	0.159102	0.10422	0.403165	0.129886	8.78089e-05	0	0.436485	0.63755	0.7783	0.910749	0.680405	0.155926	0.266779	0.0954149	0.71481	0.52876	0.645919	0.722091	0.460392	0.439676	0.42512	0.142383	0.00710409	0.145949	0.691471	0.93818	0.367024	0.659317	0.655542	0.295712	0.362576	0.307185
0.471552	0.641107	0.272097	0.218841	0.235803	0.563912	0.313392	0.0372593	0.817656	0.531817	0.228087	0.0629861	0.384882	0.66169	0.824087	0.964842	0.168838	0.250096	0.757686	0.118964	0.104245	0.638679	0.231327	0.436485	0	0.195884	0.104313	0.468584	0.916396	0.347182	0.956418	0.299635	0.850907	0.684172	0.447498	0.588498	0.710348	0.29675	0.715039	0.852992	0.92722	0.130986	0.348307	0.693368	0.188301	0.0125834	0.52702	0.627846	0.644375	0.623081
0.348836	0.868886	0.100722	0.571861	0.411215	0.857729	0.878552	0.552124	0.318366	0.73379	0.440304	0.999192	0.474069	0.98434	0.42019	0.692773	0.121637	0.00396176	0.318519	0.853137	0.23626	0.225427	0.729869	0.63755	0.195884	0	0.320165	0.192957	0.118817	0.758624	0.464276	0.971004	0.546614	0.701583	0.428565	0.339277	0.193842	0.166061	0.0546889	0.715581	0.786079	0.0230653	0.762375	0.891441	0.890767	0.011399	0.00121852	0.227136	0.527484	0.421207
0.111754	0.385087	0.64397	0.0452437	0.737491	0.213164	0.426758	0.843659	0.951914	0.0814877	0.595977	0.174529	0.424491	0.74085	0.211579	0.721235	0.271435	0.0896553	0.639569	0.776019	0.152899	0.849147	0.967822	0.7783	0.104313	0.320165	0	0.1314	0.384368	0.266957	0.0983366	0.734113	0.996215	0.879037	0.283154	0.809663	0.454618	0.823284	0.329363	0.649125	0.654905	0.456596	0.264174	0.0984475	0.58384	0.0288448	0.961588	0.545978	0.502239	0.891069
0.0521651	0.369153	0.959824	0.0132465	0.686832	0.243627	0.281834	0.376364	0.407757	0.404636	0.090081	0.892579	0.353758	0.61198	0.382098	0.86892	0.440355	0.449518	0.664083	0.549002	0.692059	0.44105	0.636286	0.910749	0.468584	0.192957	0.1314	0	0.22933	0.587561	0.985332	0.661987	0.906692	0.16301	0.750932	0.827334	0.604354	0.746579	0.285101	0.834324	0.690231	0.771395	0.37773	0.942399	0.062768	0.0931265	0.441221	0.873879	0.517616	0.946712
0.392206	0.487199	0.947314	0.557258	0.516829	0.800039	0.79073	0.229694	0.290159	0.306887	0.506602	0.151858	0.0737638	0.0319242	0.77706	0.390079	0.337316	0.185161	0.850168	0.296054	0.242639	0.267678	0.931735	0.680405	0.916396	0.118817	0.384368	0.22933	6.6469e-64	0.981999	0.628187	0.365766	0.666364	0.0854854	0.83127	0.561347	0.873024	0.287484	0.350531	0.526074	0.103685	0.904111	0.46539	0.43584	0.438794	0.305812	0.107028	0.966686	0.38032	0.434399
0.0350946	0.0494595	0.306564	0.0587045	0.712847	0.294331	0.768788	0.98475	0.804827	0.647985	0.770043	0.115114	0.981451	0.142139	0.544434	0.218448	0.494841	0.354331	0.0422122	0.648137	0.112337	0.754226	0.34197	0.155926	0.347182	0.758624	0.266957	0.587561	0.981999	0	0.383933	0.424799	0.0558467	0.467662	0.59789	0.180101	0.583896	0.605045	0.428908	0.717462	0.240707	0.597412	0.278505	0.181564	0.62586	0.191857	0.778651	0.64916	0.901799	0.146653
0.779531	0.948723	0.815244	0.679895	0.571865	0.473377	0.353082	0.816956	0.645476	0.111764	0.756608	0.910712	0.283397	0.971714	0.00129187	0.412241	0.244352	0.210643	0.592193	0.523413	0.601628	0.375945	0.275513	0.266779	0.956418	0.464276	0.0983366	0.985332	0.628187	0.383933	1.0635e-62	0.627252	0.34608	0.893483	0.83603	0.111376	0.774224	0.0438737	0.464585	0.539232	0.751098	0.313033	0.456466	0.197786	0.938374	0.519971	0.856543	0.0396154	0.0955833	0.43846
0.133776	0.000675672	0.385807	0.344096	0.695067	0.000330727	0.000206739	0.211969	0.511996	0.359215	0.286758	0.399873	0.251567	0.0486475	0.769646	0.0186693	0.618632	0.43297	0.844988	0.14259	0.580269	0.637068	0.0315356	0.0954149	0.299635	0.971004	0.734113	0.661987	0.365766	0.424799	0.627252	1.0635e-62	0.239914	0.267684	0.590136	0.179344	0.667654	0.488412	0.826947	0.329837	0.200838	0.859796	0.316973	0.168698	0.0295994	0.799801	0.847037	0.289278	0.584937	0.0554636
0.0171997	0.18397	0.780624	0.183047	0.791544	0.327624	0.446165	0.605198	0.330019	0.653198	0.997537	0.640346	0.178876	0.42989	0.564213	0.00469683	0.310805	0.144678	0.323092	0.437677	0.144373	0.154148	0.510314	0.71481	0.850907	0.546614	0.996215	0.906692	0.666364	0.0558467	0.34608	0.239914	0	0.203657	0.391154	0.293321	0.870298	0.887637	0.73865	0.487192	0.988371	0.93769	0.231757	0.306666	0.409428	0.563483	0.255796	0.470756	0.422231	0.0058848
0.735898	0.388146	0.509511	0.97665	0.0741024	0.773135	0.793257	0.330346	0.200232	0.181342	0.170235	0.109706	0.712648	0.0874466	0.636137	0.066979	0.389845	0.538134	0.875164	0.588147	0.442267	0.731382	0.818723	0.52876	0.684172	0.701583	0.879037	0.16301	0.0854854	0.467662	0.893483	0.267684	0.203657	0	0.663973	0.860338	0.58086	0.950363	0.629717	0.842464	0.290366	0.751867	0.0812606	0.820881	0.495367	0.986729	0.502068	0.771213	0.917131	0.0468577
0.147865	0.457338	0.203197	0.0714185	0.497502	0.278568	0.390331	0.504997	0.377107	0.801523	0.327546	0.143491	0.478488	0.652173	0.947663	0.456578	0.925033	0.816821	0.520897	0.186793	0.620214	0.942148	0.431846	0.645919	0.447498	0.428565	0.283154	0.750932	0.83127	0.59789	0.83603	0.590136	0.391154	0.663973	6.6469e-64	0.151318	0.00328845	0.12283	0.0743045	0.0323167	0.213415	0.744481	0.21069	0.322047	0.545255	0.815625	0.418416	0.398247	0.940648	0.492657
0.204979	0.0473399	0.0850577	0.192432	0.915158	0.16819	0.33147	0.223374	0.230097	0.705067	0.0701063	0.223953	0.898609	0.283764	0.315906	0.201301	0.244447	0.744917	0.367446	0.312279	0.639075	0.579027	0.830656	0.722091	0.588498	0.339277	0.809663	0.827334	0.561347	0.180101	0.111376	0.179344	0.293321	0.860338	0.151318	0	0.293571	0.418384	0.767051	0.0753406	0.619851	0.51717	0.536074	0.414529	0.126986	0.284113	0.58425	0.663128	0.344498	0.22067
0.48816	0.696479	0.0982655	0.275209	0.951118	0.293467	0.254491	0.0850195	0.42286	0.388658	0.0486058	0.815879	0.25924	0.614199	0.924549	0.85711	0.429679	0.612982	0.727701	0.0270523	0.58719	0.895812	0.206929	0.460392	0.710348	0.193842	0.454618	0.604354	0.873024	0.583896	0.774224	0.667654	0.870298	0.58086	0.00328845	0.293571	6.6469e-64	0.32593	0.0785369	0.0840271	0.286106	0.78133	0.0875022	0.403223	0.229714	0.308557	0.19055	0.591566	0.939081	0.614586
0.762784	0.913653	0.612692	0.307747	0.713725	0.643159	0.497017	0.529056	0.81022	0.191627	0.768198	0.361324	0.29336	0.902982	0.03951	0.817493	0.304338	0.120952	0.580966	0.464881	0.662178	0.104189	0.357128	0.439676	0.29675	0.166061	0.823284	0.746579	0.287484	0.605045	0.0438737	0.488412	0.887637	0.950363	0.12283	0.418384	0.32593	0	0.0669707	0.501688	0.759655	0.468823	0.497258	0.23685	0.599709	0.849541	0.307482	0.0113076	0.149512	0.913561
0.696349	0.548899	0.451025	0.766887	0.856143	0.771832	0.959258	0.905155	0.870667	0.310506	0.967866	0.834551	0.815571	0.881986	0.588177	0.693874	0.708802	0.174163	0.641038	0.508714	0.672135	0.741879	0.511358	0.42512	0.715039	0.0546889	0.329363	0.285101	0.350531	0.428908	0.464585	0.826947	0.73865	0.629717	0.0743045	0.767051	0.0785369	0.0669707	0	0.11443	0.179409	0.672917	0.415668	0.696543	0.623816	0.112785	0.299855	0.167451	0.801093	0.972586
0.588997	0.608329	0.488535	0.639152	0.315187	0.30698	0.263323	0.599253	0.0373617	0.983984	0.531632	0.451142	0.686441	0.388801	0.919159	0.193595	0.713176	0.934501	0.811499	0.126792	0.616029	0.420703	0.108196	0.142383	0.852992	0.715581	0.649125	0.834324	0.526074	0.717462	0.539232	0.329837	0.487192	0.842464	0.0323167	0.0753406	0.0840271	0.501688	0.11443	6.6469e-64	0.00949674	0.263226	0.376972	0.732208	0.495761	0.227674	0.887704	0.83774	0.995259	0.209304
0.918216	0.722175	0.684768	0.909426	0.0666238	0.374281	0.189347	0.805752	0.558033	0.5719	0.853506	0.363698	0.965263	0.2403	0.545057	0.192828	0.663626	0.956378	0.152982	0.421531	0.294743	0.619683	0.0407393	0.00710409	0.92722	0.786079	0.654905	0.690231	0.103685	0.240707	0.751098	0.200838	0.988371	0.290366	0.213415	0.619851	0.286106	0.759655	0.179409	0.00949674	0	0.106601	0.559716	0.722452	0.863282	0.356702	0.750985	0.545181	0.883522	0.226394
0.819659	0.689233	0.130741	0.919572	0.0338131	0.787515	0.712863	0.224644	0.281615	0.996819	0.214742	0.383578	0.88557	0.435755	0.103641	0.570809	0.152913	0.042369	0.118781	0.960916	0.484783	0.198565	0.339113	0.145949	0.130986	0.0230653	0.456596	0.771395	0.904111	0.597412	0.313033	0.859796	0.93769	0.751867	0.744481	0.51717	0.78133	0.468823	0.672917	0.263226	0.106601	0	0.265593	0.985683	0.612233	0.232772	0.0898424	0.121846	0.579419	0.302926
0.85198	0.258738	0.732917	0.70196	0.839745	0.954651	0.996565	0.982846	0.273759	0.369423	0.703297	0.878595	0.686548	0.431881	0.501822	0.187495	0.876977	0.966443	0.81511	0.587848	0.956948	0.92667	0.681906	0.691471	0.348307	0.762375	0.264174	0.37773	0.46539	0.278505	0.456466	0.316973	0.231757	0.0812606	0.21069	0.536074	0.0875022	0.497258	0.415668	0.376972	0.559716	0.265593	0	0.988489	0.834641	0.722266	0.856118	0.748666	0.673486	0.19915
0.17575	0.117008	0.0488018	0.395582	0.807214	0.0478434	0.137322	0.144336	0.348137	0.0102712	0.396338	0.607382	0.0934695	0.414893	0.109966	0.696387	0.213307	0.144411	0.0691127	0.110745	0.132529	0.212744	0.422677	0.93818	0.693368	0.891441	0.0984475	0.942399	0.43584	0.181564	0.197786	0.168698	0.306666	0.820881	0.322047	0.414529	0.403223	0.23685	0.696543	0.732208	0.722452	0.985683	0.988489	6.6469e-64	0.23965	0.819285	0.987853	0.232371	0.0363781	0.685751
0.0444861	0.024638	0.219583	0.0941068	0.598717	0.00801261	0.00535615	0.00128017	0.190488	0.136641	0.00134185	0.807226	0.0468231	0.979344	0.605118	0.308747	0.221472	0.613887	0.833915	0.00924047	0.386786	0.918788	0.066713	0.367024	0.188301	0.890767	0.58384	0.062768	0.438794	0.62586	0.938374	0.0295994	0.409428	0.495367	0.545255	0.126986	0.229714	0.599709	0.623816	0.495761	0.863282	0.612233	0.834641	0.23965	0	0.839878	0.916862	0.747668	0.958127	0.549386
0.152731	0.83374	0.288235	0.134937	0.718952	0.828233	0.915505	0.319233	0.942092	0.793934	0.482126	0.407257	0.763111	0.818271	0.73007	0.859352	0.125238	0.0329224	0.904202	0.342226	0.0858672	0.960064	0.579649	0.659317	0.0125834	0.011399	0.0288448	0.0931265	0.305812	0.191857	0.519971	0.799801	0.563483	0.986729	0.815625	0.284113	0.308557	0.849541	0.112785	0.227674	0.356702	0.232772	0.722266	0.819285	0.839878	6.6469e-64	0.148146	0.832997	0.725865	0.593952
0.470151	0.675289	0.263221	0.88947	0.882655	0.937133	0.950177	0.715821	0.0675917	0.970038	0.451082	0.492775	0.401281	0.886811	0.864235	0.486338	0.182136	0.0517869	0.674232	0.959439	0.310208	0.0664215	0.696087	0.655542	0.52702	0.00121852	0.961588	0.441221	0.107028	0.778651	0.856543	0.847037	0.255796	0.502068	0.418416	0.58425	0.19055	0.307482	0.299855	0.887704	0.750985	0.0898424	0.856118	0.987853	0.916862	0.148146	0	0.412572	0.376654	0.326795
0.651843	0.663212	0.982284	0.422517	0.696102	0.262405	0.235391	0.970913	0.391403	0.0536287	0.774897	0.99682	0.696796	0.292577	0.0137275	0.870436	0.473452	0.233753	0.69368	0.656807	0.996949	0.260015	0.286514	0.295712	0.627846	0.227136	0.545978	0.873879	0.966686	0.64916	0.0396154	0.289278	0.470756	0.771213	0.398247	0.663128	0.591566	0.0113076	0.167451	0.83774	0.545181	0.121846	0.748666	0.232371	0.747668	0.832997	0.412572	0	0.163146	0.984863
0.801103	0.972972	0.457066	0.645409	0.544358	0.425731	0.407163	0.616171	0.394712	0.156767	0.57905	0.422603	0.0460174	0.776436	0.0601873	0.849631	0.0379023	0.190093	0.229988	0.301561	0.132774	0.00529532	0.252217	0.362576	0.644375	0.527484	0.502239	0.517616	0.38032	0.901799	0.0955833	0.584937	0.422231	0.917131	0.940648	0.344498	0.939081	0.149512	0.801093	0.995259	0.883522	0.579419	0.673486	0.0363781	0.958127	0.725865	0.376654	0.163146	0	0.923199
0.0719995	0.0822797	0.699374	0.273507	0.169276	0.188643	0.244067	0.767895	0.421804	0.439034	0.682452	0.141	0.712645	0.0376757	0.779497	1.02569e-05	0.574326	0.146144	0.938724	0.811116	0.532328	0.372391	0.346532	0.307185	0.623081	0.421207	0.891069	0.946712	0.434399	0.146653	0.43846	0.0554636	0.0058848	0.0468577	0.492657	0.22067	0.614586	0.913561	0.972586	0.209304	0.226394	0.302926	0.19915	0.685751	0.549386	0.593952	0.326795	0.984863	0.923199	0
0.752349	0.84985	0.854583	0.462923	0.736073	0.422723	0.105508	0.170647	0.445097	0.936116	0.447197	0.222367	0.227085	0.756982	0.929544	0.423483	0.240254	0.756404	0.174425	0.0467402	0.0512758	0.334044	0.00295613	0.0031321	0.0297396	0.774272	0.173914	0.927936	0.791561	0.0469023	0.715584	0.186026	0.954059	0.956612	0.968723	0.847787	0.409775	0.422145	0.422863	0.171	0.0542262	0.757563	0.969587	0.749884	0.182721	0.0891053	0.959786	0.516211	0.833435	0.735057
[truncated: 1 more columns]
