# Supplementary material
Source: MDPI journal article supplement (https://www.mdpi.com/2071-1050/15/14/11446)
Supplement: s1 [file s1 › Supplementary Table S4.xlsx]

## Sheet: CORR MAT
Supplementary Table S4: Correlation Matrix for the cutting 2 x spacing 1, 2, and 3 during first growing season (year 1) for all the 17 traits of 10 Quinoa genotypes
Note: This file has 2 sheets; the first sheet is correlation matrix and the second sheet contains p-values (<0.05 and <0.01). In p-values: the red ones are significant at <0.05 and green at <0.01).
	PH_C2S1	NoL_C2S1	LA_C2S1	Br_C2S1	ID_C2S1	FW_C2S1	DW_C2S1	LCP_C2S1	LCF_C2S1	LADF_C2S1	LNDF_C2S1	LMois_C2S1	SCP_C2S1	SCF_C2S1	SADF_C2S1	SNDF_C2S1	SMois_C2S1	PH_C2S2	NoL_C2S2	LA_C2S2	Br_C2S2	ID_C2S2	FW_C2S2	DW_C2S2	LCP_C2S2	LCF_C2S2	LADF_C2S2	LNDF_C2S2	LMois_C2S2	SCP_C2S2	SCF_C2S2	SADF_C2S2	SNDF_C2S2	SMois_C2S2	PH_C2S3	NoL_C2S3	LA_C2S3	Br_C2S3	ID_C2S3	FW_C2S3	DW_C2S3	LCP_C2S3	LCF_C2S3	LADF_C2S3	LNDF_C2S3	LMois_C2S3	SCP_C2S3	SCF_C2S3	SADF_C2S3
PH_C2S1
NoL_C2S1	0.583702
LA_C2S1	0.117096	0.230122
Br_C2S1	0.082447	0.766778	0.307067
ID_C2S1	0.238909	0.517642	0.193661	0.637722
FW_C2S1	0.198728	0.737966	0.15834	0.807388	0.236675
DW_C2S1	0.23469	0.722256	0.190733	0.756859	0.211098	0.980679
LCP_C2S1	0.447638	0.171661	0.796006	0.0409005	0.0843493	-0.0949154	-0.0664662
LCF_C2S1	0.0153032	-0.00358333	0.425639	-0.0983729	0.13552	0.00810454	0.122192	0.193589
LADF_C2S1	-0.0944029	-0.480688	-0.521847	-0.49215	-0.0551023	-0.555799	-0.470063	-0.417291	-0.00214767
LNDF_C2S1	0.0842944	-0.244858	-0.524082	-0.223401	0.20321	-0.365354	-0.304801	-0.390025	-0.258106	0.881113
LMois_C2S1	0.431316	0.0783431	0.134612	-0.10388	0.3464	-0.0445191	-0.0685138	0.298933	0.45646	-0.218183	-0.237136
SCP_C2S1	-0.20602	0.00149424	-0.537416	0.136566	-0.0505125	0.0498409	0.0300926	-0.431784	-0.354695	0.439929	0.344459	-0.413736
SCF_C2S1	-0.316645	0.25547	-0.129717	0.588149	0.0984426	0.504419	0.507131	-0.283981	-0.410141	-0.100504	0.122294	-0.684654	0.382226
SADF_C2S1	0.357006	-0.116055	-0.620006	-0.187138	0.113932	-0.18318	-0.171496	-0.202633	-0.338467	0.610936	0.701512	0.153871	0.533595	-0.0142121
SNDF_C2S1	0.751862	0.4435	-0.224051	0.233289	0.205533	0.39999	0.414616	0.122404	-0.30126	-0.0178951	0.279567	0.246813	0.0820594	0.161138	0.659828
SMois_C2S1	0.0485356	-0.0237241	0.550791	-0.121691	-0.452319	0.0573242	0.0247619	0.599733	0.0370423	-0.754479	-0.793514	0.131348	-0.603786	-0.190116	-0.601354	-0.142291
PH_C2S2	0.920927	0.498628	0.013344	-0.00775601	0.0146149	0.0988984	0.118191	0.410411	-0.223848	-0.00478292	0.121423	0.171813	0.0382768	-0.254706	0.413661	0.683594	0.052941
NoL_C2S2	0.279687	0.778308	-0.0746547	0.573783	0.193203	0.706365	0.689369	-0.157573	0.122198	-0.338555	-0.353185	0.0316962	0.385855	0.213192	-0.0566888	0.222951	-0.132891	0.285158
LA_C2S2	0.240955	0.0299876	0.426976	-0.0468932	0.143863	-0.0528683	0.100895	0.470807	0.475808	0.0442094	0.112668	0.0763513	-0.451753	0.113056	-0.0802653	0.183699	0.130098	0.0399942	-0.262652
Br_C2S2	-0.440275	0.0730244	-0.469951	0.209842	0.0259673	0.109498	0.103789	-0.651735	-0.0979723	0.383697	0.236468	-0.521519	0.82255	0.411829	0.114624	-0.297361	-0.63599	-0.266403	0.482564	-0.43075
ID_C2S2	0.371194	0.464937	-0.0380376	0.486436	0.750792	0.228439	0.240657	0.0110221	0.134867	0.271109	0.366384	0.2753	0.458333	0.039795	0.522599	0.389914	-0.689728	0.290201	0.423311	-0.00642337	0.324183
FW_C2S2	0.0520603	0.470886	0.00445288	0.430067	-0.0866707	0.821216	0.879569	-0.305187	0.286638	-0.30583	-0.276036	-0.143041	-0.0338206	0.420576	-0.267132	0.210022	0.0325335	-0.0642553	0.602475	0.144837	0.182508	-0.0432604
DW_C2S2	0.0433264	0.420855	0.066362	0.356961	-0.157795	0.744429	0.831123	-0.204695	0.395628	-0.248389	-0.298845	-0.163948	0.0375411	0.392217	-0.259225	0.156985	0.0479973	-0.0467838	0.61681	0.239976	0.227357	-0.0178137	0.969332
LCP_C2S2	0.369094	0.158303	0.235103	-0.0885559	-0.27783	0.354249	0.353183	0.141628	0.209033	-0.472741	-0.434342	0.374308	-0.681774	-0.363782	-0.324674	0.215738	0.563688	0.224582	0.0390908	0.036723	-0.623856	-0.431508	0.450276	0.353316
LCF_C2S2	0.589494	0.337146	0.528416	0.0944562	-0.0622451	0.363478	0.361272	0.585743	0.326805	-0.534296	-0.562957	0.583454	-0.423977	-0.490501	-0.151436	0.323645	0.549004	0.486765	0.246695	0.0528683	-0.592572	0.0279581	0.222623	0.232618	0.725592
LADF_C2S2	-0.285675	-0.68239	-0.462849	-0.45355	-0.380843	-0.323327	-0.281776	-0.414638	-0.209282	0.736511	0.64136	-0.272528	0.386945	0.0423358	0.557582	0.0691274	-0.428244	-0.159609	-0.482016	-0.121763	0.170709	-0.0367598	-0.145104	-0.131981	-0.162585	-0.297523
LNDF_C2S2	-0.0683789	-0.529442	-0.594151	-0.539823	-0.40047	-0.526448	-0.570864	-0.328125	-0.688179	0.570684	0.598019	-0.313792	0.302924	-0.0914145	0.53387	0.1049	-0.238088	0.172124	-0.501174	-0.417147	0.0591985	-0.216286	-0.504692	-0.560389	-0.154104	-0.360575	0.690952
LMois_C2S2	0.381777	0.165266	0.601937	-0.0822791	-0.140752	0.0977187	0.096283	0.653751	0.496562	-0.522492	-0.708472	0.602283	-0.416452	-0.647607	-0.330735	-0.0349389	0.633569	0.310028	0.197616	0.0401242	-0.494469	-0.0674577	0.031135	0.104647	0.549308	0.896512	-0.412566	-0.444184
SCP_C2S2	0.327997	0.551037	-0.147506	0.334354	-0.108538	0.591687	0.63737	-0.284021	-0.0672698	0.0925104	0.10615	-0.390538	0.392822	0.272938	0.0883539	0.30999	-0.282223	0.441304	0.663356	-0.190763	0.446351	0.251554	0.638371	0.634321	0.174652	0.161515	0.0647347	-0.0219859	-0.0548555
SCF_C2S2	-0.455999	-0.126368	0.0280326	0.23658	-0.163003	0.0107484	-0.0570078	0.0409921	-0.688576	-0.219019	-0.0508119	-0.670483	0.207388	0.696015	-0.148441	-0.12251	0.227086	-0.262601	-0.242966	-0.0832164	0.110373	-0.340439	-0.184431	-0.205786	-0.392237	-0.45919	0.0387583	0.246394	-0.461986	-0.196778
SADF_C2S2	0.275983	0.148147	0.0950019	0.134019	-0.0109341	0.260607	0.304942	-0.0659506	0.0332417	0.332414	0.310364	-0.158597	0.233999	-0.0882844	0.225199	0.216211	-0.335015	0.35457	0.141032	-0.175948	0.14137	0.353757	0.216821	0.211638	0.193062	0.31821	0.447526	0.199199	0.0928132	0.689726	-0.319731
SNDF_C2S2	0.404739	-0.122735	0.144225	-0.460701	-0.182297	-0.536964	-0.556031	0.367449	-0.210934	0.18492	0.150493	0.0566539	-0.220145	-0.631216	0.0513144	-0.0540961	0.180936	0.555668	-0.342522	-0.182101	-0.335486	-0.140649	-0.600544	-0.602648	0.164189	0.237566	0.0350378	0.509875	0.283843	-0.0148534	-0.149013	0.288393
SMois_C2S2	0.165701	0.478536	0.373549	0.303661	-0.156831	0.604849	0.561077	0.111856	0.259822	-0.71484	-0.781027	0.19093	-0.331909	-0.186062	-0.612975	-0.0943523	0.534972	0.114888	0.55416	-0.268944	-0.133413	-0.230181	0.569496	0.520229	0.71623	0.6808	-0.514812	-0.483569	0.648985	0.394398	-0.272467	0.178272	-0.0033501
PH_C2S3	0.974027	0.503506	0.172088	0.0505707	0.238126	0.135801	0.190639	0.52871	0.0918784	-0.0105562	0.119457	0.44694	-0.124101	-0.331909	0.430089	0.740511	0.00704658	0.904328	0.238607	0.311812	-0.4198	0.458103	-0.0111533	0.0238992	0.26045	0.598491	-0.197896	-0.0881299	0.419222	0.28659	-0.467212	0.319607	0.379234	0.0668154
NoL_C2S3	0.480118	0.93468	0.28187	0.722636	0.399028	0.773665	0.787989	0.194328	0.228347	-0.50205	-0.394145	0.117162	0.0696677	0.247279	-0.176178	0.348759	0.0286524	0.385058	0.880215	0.111291	0.154692	0.454827	0.600736	0.615373	0.13858	0.399811	-0.674472	-0.713042	0.300707	0.555935	-0.208701	0.109636	-0.307785	0.544317	0.446732
LA_C2S3	0.209326	0.300803	0.938326	0.383012	0.299381	0.157391	0.187184	0.876888	0.345501	-0.481088	-0.458099	0.174977	-0.330253	-0.0488577	-0.39625	-0.0573244	0.448694	0.129059	0.0141453	0.452136	-0.400315	0.178635	-0.0917932	0.00501092	0.0175454	0.494241	-0.471444	-0.59958	0.567767	-0.173204	0.0882222	0.0359448	0.0739835	0.207786	0.306089	0.371062
Br_C2S3	0.17931	0.639101	0.0116508	0.705352	0.618089	0.507711	0.544169	-0.119404	0.126504	0.127636	0.217575	-0.13509	0.548832	0.43999	0.226819	0.252976	-0.625165	0.147089	0.660505	0.0550889	0.585161	0.839875	0.328697	0.369749	-0.463715	-0.126023	-0.163771	-0.40746	-0.218059	0.527173	-0.107006	0.327383	-0.396905	-0.0590678	0.236248	0.682889	0.185772
ID_C2S3	0.363734	0.464955	0.64218	0.593223	0.800578	0.226874	0.250842	0.567059	0.200093	-0.181633	0.064795	0.246225	-0.251758	0.0919767	-0.026075	0.250299	-0.0967223	0.17467	-0.00847198	0.463635	-0.306775	0.587562	-0.111219	-0.114756	-0.132108	0.226165	-0.345541	-0.460697	0.125732	-0.112053	-0.0245045	0.152958	-0.00824289	-0.10616	0.423363	0.382125	0.738836	0.485124
FW_C2S3	0.116584	0.633306	0.195112	0.699157	0.111671	0.961433	0.968813	-0.0713955	0.202721	-0.544938	-0.466063	0.00109394	0.0549144	0.441496	-0.239155	0.298276	0.117757	0.0070643	0.724261	0.0245571	0.133397	0.172451	0.883823	0.857012	0.363781	0.408841	-0.299005	-0.63398	0.21216	0.557584	-0.0759569	0.217175	-0.629273	0.640815	0.0871338	0.764515	0.192361	0.47392	0.135092
DW_C2S3	0.217316	0.619732	0.216418	0.609812	0.0241887	0.932573	0.9565	0.00581039	0.234636	-0.529649	-0.471867	0.0352037	0.0165936	0.364702	-0.205538	0.360044	0.179006	0.115239	0.708625	0.0823099	0.0524527	0.137623	0.888413	0.879037	0.440741	0.504006	-0.275233	-0.611201	0.298842	0.590003	-0.13921	0.260316	-0.553284	0.661526	0.195653	0.763	0.213635	0.418893	0.107981	0.9862
LCP_C2S3	0.518632	0.193716	0.139032	-0.201479	-0.268663	0.244512	0.348673	0.103239	0.334683	-0.0799965	-0.0467082	0.148067	-0.571715	-0.227123	-0.145451	0.331793	0.274898	0.378711	0.0321529	0.427237	-0.476054	-0.298359	0.537763	0.508969	0.797167	0.489268	-0.0371377	-0.131756	0.296956	0.386513	-0.485622	0.292643	0.161352	0.413832	0.443189	0.192097	-0.0423775	-0.235273	-0.0738196	0.273976	0.383506
LCF_C2S3	0.253829	-0.0353879	0.520304	-0.0869683	-0.399308	0.104426	0.185285	0.709468	0.191059	-0.266417	-0.358049	0.028565	-0.124556	-2.2224e-15	-0.0415705	0.241207	0.563495	0.29524	-0.0542775	0.482712	-0.432353	-0.163037	0.112835	0.264397	0.210268	0.549525	0.0205151	-0.230054	0.535586	0.0165437	0.101266	0.102627	0.00517447	0.125301	0.378051	0.142753	0.606236	-0.120922	0.145833	0.234597	0.346473	0.268486
LADF_C2S3	-0.0585339	-0.511864	-0.484559	-0.488415	-0.131311	-0.541899	-0.453139	-0.311334	-0.139388	0.965905	0.901326	-0.300506	0.43302	0.00827922	0.669385	0.103027	-0.660928	0.0596205	-0.435883	0.124529	0.272959	0.20351	-0.330282	-0.269342	-0.465491	-0.514266	0.805762	0.648971	-0.553611	0.0702974	-0.0543921	0.332872	0.194038	-0.78724	0.0367972	-0.548685	-0.418279	0.0681316	-0.148365	-0.545402	-0.515963	-0.0632361	-0.101743
LNDF_C2S3	-0.0497062	-0.317943	-0.601381	-0.303006	0.0847975	-0.46885	-0.41739	-0.448079	-0.337802	0.88994	0.966013	-0.376075	0.419383	0.174976	0.634846	0.137711	-0.755295	0.049527	-0.35979	0.0492915	0.351323	0.240341	-0.337265	-0.344146	-0.548656	-0.71735	0.611848	0.658348	-0.787261	0.0633081	0.0818286	0.165513	0.158577	-0.822445	-0.024245	-0.457645	-0.534161	0.153916	-0.0878285	-0.558594	-0.573144	-0.151484	-0.404114	0.906178
LMois_C2S3	0.560039	0.130533	0.101266	0.0199817	0.372656	0.0514898	-0.0014074	0.321793	0.124281	-0.164938	-0.0631378	0.881776	-0.275129	-0.576244	0.378306	0.495823	0.0524627	0.375669	-0.0251992	-0.0769243	-0.562445	0.38872	-0.219389	-0.282429	0.377132	0.643452	-0.0656741	-0.0487439	0.507913	-0.237921	-0.515012	0.134481	0.204313	0.124197	0.578831	0.0712324	0.174143	-0.0793321	0.350254	0.00907031	0.0471928	0.105196	0.0725996	-0.17586	-0.249512
SCP_C2S3	-0.219693	-0.148958	-0.513443	-0.148794	-0.260985	-0.10424	-0.0516879	-0.304306	-0.0444701	0.409438	0.213818	-0.309108	0.786113	0.335853	0.431068	0.0347671	-0.383326	-0.0536186	0.303855	-0.0165489	0.659605	0.206333	0.0661566	0.217431	-0.62701	-0.44336	0.272058	0.0856796	-0.319225	0.173496	0.125571	-0.160908	-0.40294	-0.4036	-0.115844	0.0504538	-0.299367	0.356554	-0.39581	0.0220111	0.0262495	-0.358744	0.128423	0.41318	0.335741	-0.407675
SCF_C2S3	-0.0202251	-0.0401799	0.121602	0.0808475	-0.048302	-0.137858	-0.113069	0.289062	-0.537954	0.0164815	0.267716	-0.580843	-0.0216546	0.577232	0.0423791	0.174138	0.143684	0.092637	-0.405999	0.417112	-0.171566	-0.224982	-0.231149	-0.220133	-0.328797	-0.394864	0.0476001	0.254918	-0.471296	-0.155242	0.777863	-0.227889	0.0668347	-0.50151	-0.0143451	-0.172977	0.201479	-0.0688834	0.235568	-0.242794	-0.243008	-0.106569	0.261293	0.218024	0.340881	-0.426016	0.0509842
SADF_C2S3	0.384863	0.37462	0.0258153	0.340602	0.25698	0.493158	0.581011	0.0263657	0.391639	0.170143	0.13645	0.224482	0.372626	0.0976885	0.427956	0.507615	-0.408596	0.291474	0.519504	0.215274	0.202547	0.701292	0.467484	0.550579	-0.020342	0.347427	0.154808	-0.36561	0.17764	0.515964	-0.471751	0.524955	-0.378164	0.0626608	0.499914	0.538603	0.177615	0.694904	0.307689	0.571498	0.610419	0.176065	0.331466	0.157714	-0.0235442	0.292757	0.346613	-0.331549
SNDF_C2S3	0.588817	0.0840866	-0.388791	-0.0476351	0.169084	0.0288822	0.0430861	0.0754121	-0.290292	0.270697	0.469706	0.338443	0.233713	0.0056417	0.891478	0.887299	-0.298502	0.550327	-0.0221376	0.144796	-0.23943	0.446575	-0.123992	-0.134996	-0.0478564	0.140432	0.316877	0.308079	-0.115803	0.0274178	-0.14066	0.112508	-0.0111532	-0.431272	0.640522	0.0206687	-0.162456	0.152055	0.157977	-0.0342312	0.024103	0.0746486	0.19784	0.382489	0.353437	0.561491	0.228823	0.137661	0.464826
SMois_C2S3	0.0708099	-0.128637	0.514831	-0.0733452	-0.226137	-0.145812	-0.124161	0.538498	0.0899808	0.060726	-0.141438	-0.102406	0.194698	-0.267643	-0.0269219	-0.161442	0.185022	0.257978	-0.0747693	-0.0831177	-0.0371285	0.130261	-0.286254	-0.151309	-0.0856279	0.409473	0.204337	0.0706002	0.487956	0.150561	0.00972571	0.558916	0.447288	0.0971223	0.21406	-0.0471712	0.557992	0.051771	0.193839	-0.0875004	-0.0258013	-0.136331	0.570186	0.117019	-0.178368	0.0754368	-0.00557121	-0.0167124	0.235251
[truncated: 2 more columns]

## Sheet: P_VALUES
	PH_C2S1	NoL_C2S1	LA_C2S1	Br_C2S1	ID_C2S1	FW_C2S1	DW_C2S1	LCP_C2S1	LCF_C2S1	LADF_C2S1	LNDF_C2S1	LMois_C2S1	SCP_C2S1	SCF_C2S1	SADF_C2S1	SNDF_C2S1	SMois_C2S1	PH_C2S2	NoL_C2S2	LA_C2S2	Br_C2S2	ID_C2S2	FW_C2S2	DW_C2S2	LCP_C2S2	LCF_C2S2	LADF_C2S2	LNDF_C2S2	LMois_C2S2	SCP_C2S2	SCF_C2S2	SADF_C2S2	SNDF_C2S2	SMois_C2S2	PH_C2S3	NoL_C2S3	LA_C2S3	Br_C2S3	ID_C2S3	FW_C2S3	DW_C2S3	LCP_C2S3	LCF_C2S3	LADF_C2S3	LNDF_C2S3	LMois_C2S3	SCP_C2S3	SCF_C2S3	SADF_C2S3
PH_C1S1	1.0635e-62	0.0764672	0.747335	0.820868	0.506208	0.582047	0.513971	0.194541	0.966532	0.795324	0.816911	0.213296	0.567977	0.37271	0.311204	0.0121401	0.894078	0.000155337	0.433839	0.502461	0.202877	0.290948	0.886426	0.905401	0.293899	0.0728921	0.423636	0.851119	0.276312	0.354841	0.185321	0.440206	0.24597	0.647318	1.92952e-06	0.160194	0.561641	0.620129	0.301507	0.74841	0.546442	0.124557	0.479162	0.872395	0.891536	0.0922458	0.541952	0.955776	0.272121
NoL_C1S1	0.0764672	0	0.52243	0.00966147	0.125405	0.0148218	0.0183221	0.635363	0.992162	0.159626	0.495349	0.829673	0.996731	0.476226	0.749522	0.1992	0.948133	0.142383	0.00800779	0.934461	0.841108	0.175756	0.169555	0.225841	0.662261	0.34076	0.0296956	0.11553	0.648193	0.0987542	0.727942	0.682948	0.735526	0.161776	0.137901	7.35695e-05	0.398369	0.0466613	0.175736	0.0493348	0.055992	0.591793	0.922686	0.130423	0.370644	0.719274	0.681288	0.912248	0.286164
LA_C1S1	0.747335	0.52243	0	0.388124	0.5919	0.662185	0.597621	0.00587458	0.220053	0.121828	0.119953	0.710815	0.109142	0.720972	0.0558522	0.533759	0.0989359	0.970815	0.8376	0.21845	0.170521	0.916913	0.99026	0.855471	0.513207	0.116369	0.177963	0.0700976	0.0655832	0.684261	0.938727	0.794049	0.690989	0.287654	0.634509	0.430106	5.87332e-05	0.974517	0.0452806	0.589073	0.548143	0.701678	0.123133	0.155804	0.0658991	0.780739	0.12904	0.737894	0.943567
Br_C1S1	0.820868	0.00966147	0.388124	0	0.0472884	0.00473845	0.0112652	0.91068	0.78688	0.148472	0.534979	0.775199	0.706771	0.0737119	0.604674	0.516559	0.737709	0.983035	0.0828498	0.897646	0.560654	0.153972	0.214772	0.311269	0.807796	0.795211	0.187995	0.107259	0.821228	0.345027	0.510488	0.712042	0.180251	0.393679	0.889659	0.0182312	0.27463	0.0226874	0.0706489	0.0244517	0.0612154	0.576725	0.811189	0.152053	0.39475	0.956307	0.681624	0.824298	0.335518
ID_C1S1	0.506208	0.125405	0.5919	0.0472884	0	0.510312	0.558256	0.816793	0.708935	0.879829	0.573385	0.326815	0.889785	0.786732	0.753984	0.568913	0.189347	0.968037	0.592794	0.691733	0.943235	0.0123334	0.811826	0.663291	0.437027	0.864365	0.277587	0.251464	0.698132	0.76535	0.652755	0.976085	0.614214	0.665246	0.507645	0.253334	0.400712	0.0568361	0.00539724	0.758744	0.947118	0.452913	0.25297	0.717659	0.815834	0.2889	0.466418	0.894585	0.473531
FW_C1S1	0.582047	0.0148218	0.662185	0.00473845	0.510312	0	5.95596e-07	0.794233	0.982272	0.0952763	0.299197	0.902807	0.891243	0.137071	0.612471	0.252085	0.875015	0.785763	0.0224074	0.884673	0.763324	0.525561	0.00358046	0.013528	0.315224	0.301874	0.362139	0.117988	0.78827	0.0715672	0.97649	0.467087	0.109499	0.0639452	0.708354	0.00864734	0.664109	0.134107	0.528479	9.23821e-06	8.33176e-05	0.495976	0.774043	0.105651	0.171661	0.887664	0.774437	0.704101	0.147514
DW_C1S1	0.513971	0.0183221	0.597621	0.0112652	0.558256	5.95596e-07	0	0.855246	0.736661	0.170404	0.391815	0.850828	0.934232	0.134626	0.635693	0.233518	0.945867	0.745039	0.0274282	0.781526	0.775391	0.503007	0.000793855	0.00288685	0.316785	0.305036	0.430266	0.0847913	0.791323	0.0474496	0.8757	0.391585	0.0951088	0.0915141	0.597805	0.00678306	0.604583	0.10391	0.484525	3.98598e-06	1.48621e-05	0.323436	0.60832	0.188445	0.230087	0.996921	0.887234	0.755799	0.0781664
LCP_C1S1	0.194541	0.635363	0.00587458	0.91068	0.816793	0.794233	0.855246	0	0.592041	0.230209	0.26519	0.401452	0.212743	0.426511	0.574497	0.736218	0.0668412	0.238774	0.66374	0.169635	0.0411716	0.975892	0.391185	0.570523	0.696329	0.0751944	0.233492	0.354642	0.0403381	0.426443	0.91048	0.856359	0.296223	0.758354	0.116129	0.5906	0.000864025	0.742495	0.0873662	0.844616	0.98729	0.776556	0.0215648	0.38122	0.194048	0.364552	0.392624	0.417915	0.942365
LCF_C1S1	0.966532	0.992162	0.220053	0.78688	0.708935	0.982272	0.736661	0.592041	0	0.995302	0.471527	0.18482	0.314571	0.239114	0.338752	0.397617	0.919081	0.53414	0.736648	0.164524	0.787731	0.710286	0.422005	0.257775	0.562201	0.356697	0.561726	0.0278061	0.144308	0.853511	0.0276795	0.927364	0.55857	0.46848	0.800704	0.525732	0.328157	0.727659	0.579404	0.574328	0.51407	0.344524	0.596983	0.700943	0.339763	0.732295	0.902914	0.10872	0.263041
LADF_C1S1	0.795324	0.159626	0.121828	0.148472	0.879829	0.0952763	0.170404	0.230209	0.995302	0	0.000755389	0.544803	0.203274	0.782354	0.0606085	0.960867	0.0116762	0.989538	0.338619	0.903481	0.2737	0.44865	0.390137	0.48895	0.167648	0.111615	0.0151244	0.0849122	0.121285	0.799357	0.543225	0.348007	0.609038	0.020158	0.976911	0.139229	0.159229	0.725301	0.615528	0.103325	0.115362	0.826123	0.456846	5.6734e-06	0.00056098	0.648855	0.24	0.963956	0.6384
LNDF_C1S1	0.816911	0.495349	0.119953	0.534979	0.573385	0.299197	0.391815	0.26519	0.471527	0.000755389	0	0.509463	0.329715	0.736446	0.0237703	0.434044	0.00614707	0.73827	0.316782	0.756644	0.510693	0.297733	0.440116	0.401598	0.209742	0.0901966	0.0456457	0.0678303	0.0218327	0.770395	0.889135	0.382784	0.678152	0.00764925	0.742385	0.259726	0.183046	0.545953	0.858855	0.174572	0.168545	0.898048	0.30969	0.000367629	5.60255e-06	0.862435	0.553077	0.45457	0.707012
LMois_C1S1	0.213296	0.829673	0.710815	0.775199	0.326815	0.902807	0.850828	0.401452	0.18482	0.544803	0.509463	0	0.234613	0.0289464	0.671263	0.491801	0.717583	0.635058	0.930734	0.833952	0.122105	0.441385	0.693422	0.650848	0.286598	0.0766226	0.446184	0.377269	0.0653874	0.264506	0.0338535	0.661664	0.876467	0.597236	0.195322	0.747197	0.628743	0.709826	0.492866	0.997607	0.923087	0.683111	0.937565	0.398857	0.284147	0.000739297	0.384813	0.078273	0.532952
SCP_C1S1	0.567977	0.996731	0.109142	0.706771	0.889785	0.891243	0.934232	0.212743	0.314571	0.203274	0.329715	0.234613	0	0.275699	0.112176	0.821699	0.0645399	0.916392	0.270781	0.18997	0.00348077	0.182793	0.926102	0.917995	0.0299017	0.222054	0.269313	0.394885	0.231244	0.261474	0.565351	0.515246	0.5411	0.348786	0.732672	0.848339	0.351343	0.100391	0.482879	0.880236	0.963711	0.0842226	0.731721	0.211291	0.227639	0.441681	0.00700911	0.952653	0.288943
SCF_C1S1	0.37271	0.476226	0.720972	0.0737119	0.786732	0.137071	0.134626	0.426511	0.239114	0.782354	0.736446	0.0289464	0.275699	0	0.968917	0.656522	0.59883	0.477591	0.554267	0.755827	0.236995	0.913086	0.226181	0.262275	0.301439	0.150046	0.907556	0.801694	0.042915	0.445473	0.0253817	0.808376	0.0503234	0.606789	0.348786	0.490958	0.893378	0.203204	0.800495	0.20148	0.300126	0.528014	1	0.98189	0.628744	0.0812354	0.342734	0.0805929	0.788334
SADF_C1S1	0.311204	0.749522	0.0558522	0.604674	0.753984	0.612471	0.635693	0.574497	0.338752	0.0606085	0.0237703	0.671263	0.112176	0.968917	0	0.0378939	0.0659147	0.234706	0.876391	0.825546	0.752528	0.121195	0.455592	0.469538	0.360026	0.676226	0.0939946	0.111955	0.350597	0.808228	0.682346	0.53161	0.888045	0.0595168	0.214746	0.626352	0.25696	0.528582	0.943	0.505758	0.568904	0.688472	0.909222	0.0342555	0.0486145	0.281066	0.213588	0.907462	0.21728
SNDF_C1S1	0.0121401	0.1992	0.533759	0.516559	0.568913	0.252085	0.233518	0.736218	0.397617	0.960867	0.434044	0.491801	0.821699	0.656522	0.0378939	6.6469e-64	0.694965	0.0292955	0.535822	0.611447	0.404053	0.265336	0.56031	0.664934	0.549432	0.36164	0.849504	0.77304	0.923664	0.383388	0.735995	0.548534	0.882011	0.795432	0.0143025	0.323309	0.875014	0.48069	0.485504	0.402537	0.306805	0.348964	0.502001	0.777006	0.704405	0.145	0.924039	0.630416	0.134192
SMois_C1S1	0.894078	0.948133	0.0989359	0.737709	0.189347	0.875015	0.945867	0.0668412	0.919081	0.0116762	0.00614707	0.717583	0.0645399	0.59883	0.0659147	0.694965	0	0.884516	0.714381	0.720178	0.0480843	0.0273148	0.928908	0.895247	0.0896879	0.100263	0.216937	0.507715	0.0492113	0.429505	0.528083	0.344015	0.616907	0.111076	0.984586	0.937374	0.193362	0.0532602	0.790388	0.745948	0.620732	0.44208	0.0898224	0.0374624	0.0115341	0.885553	0.274204	0.692099	0.241064
PH_C1S2	0.000155337	0.142383	0.970815	0.983035	0.968037	0.785763	0.745039	0.238774	0.53414	0.989538	0.73827	0.635058	0.916392	0.477591	0.234706	0.0292955	0.884516	0	0.424513	0.912653	0.456871	0.416	0.86002	0.897884	0.532764	0.153651	0.659615	0.634437	0.383326	0.2017	0.463561	0.314753	0.0953705	0.751974	0.000326111	0.271857	0.722338	0.685115	0.629355	0.984548	0.751236	0.280509	0.407574	0.870043	0.891925	0.284709	0.883046	0.799087	0.413864
NoL_C1S2	0.433839	0.00800779	0.8376	0.0828498	0.592794	0.0224074	0.0274282	0.66374	0.736648	0.338619	0.316782	0.930734	0.270781	0.554267	0.876391	0.535822	0.714381	0.424513	6.6469e-64	0.463472	0.157767	0.222859	0.0652787	0.0574987	0.914619	0.492015	0.158309	0.140033	0.584205	0.0365217	0.498792	0.697556	0.332622	0.0964641	0.506762	0.000777584	0.969063	0.0376281	0.981469	0.0178463	0.0217914	0.929738	0.881617	0.207947	0.307171	0.944912	0.393361	0.244361	0.123813
LA_C1S2	0.502461	0.934461	0.21845	0.897646	0.691733	0.884673	0.781526	0.169635	0.164524	0.903481	0.756644	0.833952	0.18997	0.755827	0.825546	0.611447	0.720178	0.912653	0.463472	0	0.213964	0.985949	0.689733	0.504253	0.919777	0.884673	0.737557	0.230387	0.912369	0.597563	0.81922	0.62681	0.614604	0.452423	0.38045	0.759544	0.189548	0.879858	0.17713	0.946314	0.821162	0.218138	0.157621	0.731779	0.892436	0.83272	0.963809	0.23043	0.550312
Br_C1S2	0.202877	0.841108	0.170521	0.560654	0.943235	0.763324	0.775391	0.0411716	0.787731	0.2737	0.510693	0.122105	0.00348077	0.236995	0.752528	0.404053	0.0480843	0.456871	0.157767	0.213964	0	0.360795	0.613799	0.527578	0.0539101	0.0710367	0.637268	0.870956	0.146274	0.195983	0.761478	0.69686	0.343295	0.713297	0.227129	0.669594	0.251664	0.0755558	0.388598	0.713331	0.885575	0.164275	0.212074	0.445437	0.31952	0.0905544	0.0379819	0.635552	0.574662
ID_C1S2	0.290948	0.175756	0.916913	0.153972	0.0123334	0.525561	0.503007	0.975892	0.710286	0.44865	0.297733	0.441385	0.182793	0.913086	0.121195	0.265336	0.0273148	0.416	0.222859	0.985949	0.360795	0	0.905545	0.961045	0.21307	0.938889	0.919696	0.548394	0.853106	0.483245	0.335765	0.315943	0.698345	0.522319	0.183043	0.186597	0.621469	0.00235955	0.0740721	0.633784	0.704587	0.4024	0.652686	0.572807	0.503584	0.266932	0.567376	0.532016	0.0238333
FW_C1S2	0.886426	0.169555	0.99026	0.214772	0.811826	0.00358046	0.000793855	0.391185	0.422005	0.390137	0.440116	0.693422	0.926102	0.226181	0.455592	0.56031	0.928908	0.86002	0.0652787	0.689733	0.613799	0.905545	0	3.72944e-06	0.191603	0.536439	0.689184	0.136824	0.931958	0.0469926	0.610002	0.54738	0.0663764	0.0857116	0.975605	0.0662666	0.800886	0.353754	0.759696	0.000691184	0.000591645	0.10887	0.756292	0.351297	0.34058	0.542527	0.855914	0.520522	0.173084
DW_C1S2	0.905401	0.225841	0.855471	0.311269	0.663291	0.013528	0.00288685	0.570523	0.257775	0.48895	0.401598	0.650848	0.917995	0.262275	0.469538	0.664934	0.895247	0.897884	0.0574987	0.504253	0.527578	0.961045	3.72944e-06	6.6469e-64	0.316589	0.5178	0.716268	0.091999	0.773576	0.0488594	0.568426	0.557226	0.065181	0.123197	0.94775	0.0582493	0.989039	0.292977	0.752252	0.00153336	0.000807448	0.132984	0.460395	0.451728	0.330185	0.429154	0.546224	0.541124	0.0990927
LCP_C1S2	0.293899	0.662261	0.513207	0.807796	0.437027	0.315224	0.316785	0.696329	0.562201	0.167648	0.209742	0.286598	0.0299017	0.301439	0.360026	0.549432	0.0896879	0.532764	0.914619	0.919777	0.0539101	0.21307	0.191603	0.316589	0	0.0175354	0.653598	0.670789	0.100037	0.62939	0.262248	0.59307	0.650363	0.0198045	0.467366	0.702612	0.961631	0.177046	0.716005	0.30144	0.202343	0.00575061	0.559841	0.175172	0.100523	0.282684	0.052353	0.353598	0.95552
LCF_C1S2	0.0728921	0.34076	0.116369	0.795211	0.864365	0.301874	0.305036	0.0751944	0.356697	0.111615	0.0901966	0.0766226	0.222054	0.150046	0.676226	0.36164	0.100263	0.153651	0.492015	0.884673	0.0710367	0.938889	0.536439	0.5178	0.0175354	0	0.403784	0.30604	0.000442145	0.65576	0.181871	0.37022	0.508673	0.0302293	0.0675571	0.252317	0.146489	0.728662	0.529803	0.240754	0.137446	0.15123	0.0998752	0.128322	0.019523	0.0447187	0.199359	0.258779	0.325287
LADF_C1S2	0.423636	0.0296956	0.177963	0.187995	0.277587	0.362139	0.430266	0.233492	0.561726	0.0151244	0.0456457	0.446184	0.269313	0.907556	0.0939946	0.849504	0.216937	0.659615	0.158309	0.737557	0.637268	0.919696	0.689184	0.716268	0.653598	0.403784	0	0.0269308	0.236073	0.858985	0.915343	0.194666	0.923449	0.127847	0.58366	0.0324191	0.16898	0.651207	0.328097	0.401334	0.441501	0.918873	0.955142	0.00489018	0.0601184	0.856956	0.447	0.89611	0.669357
LNDF_C1S2	0.851119	0.11553	0.0700976	0.107259	0.251464	0.117988	0.0847913	0.354642	0.0278061	0.0849122	0.0678303	0.377269	0.394885	0.801694	0.111955	0.77304	0.507715	0.634437	0.140033	0.230387	0.870956	0.548394	0.136824	0.091999	0.670789	0.30604	0.0269308	0	0.198426	0.951929	0.49256	0.581134	0.13218	0.156777	0.808706	0.0206216	0.0669293	0.242503	0.180255	0.0490189	0.0604658	0.716736	0.522555	0.0423336	0.0384798	0.893626	0.813946	0.477213	0.298833
LMois_C1S2	0.276312	0.648193	0.0655832	0.821228	0.698132	0.78827	0.791323	0.0403381	0.144308	0.121285	0.0218327	0.0653874	0.231244	0.042915	0.350597	0.923664	0.0492113	0.383326	0.584205	0.912369	0.146274	0.853106	0.931958	0.773576	0.100037	0.000442145	0.236073	0.198426	0	0.880364	0.17888	0.798711	0.426746	0.0423277	0.227836	0.398527	0.0868831	0.545037	0.729268	0.556232	0.401602	0.404724	0.110589	0.0968645	0.00687019	0.133926	0.368611	0.169132	0.623444
SCP_C1S2	0.354841	0.0987542	0.684261	0.345027	0.76535	0.0715672	0.0474496	0.426443	0.853511	0.799357	0.770395	0.264506	0.261474	0.445473	0.808228	0.383388	0.429505	0.2017	0.0365217	0.597563	0.195983	0.483245	0.0469926	0.0488594	0.62939	0.65576	0.858985	0.951929	0.880364	6.6469e-64	0.585832	0.0273156	0.967515	0.259393	0.422088	0.0951783	0.632279	0.11739	0.757939	0.0939931	0.0725828	0.269894	0.963821	0.846982	0.862067	0.508021	0.631696	0.668475	0.126849
SCF_C1S2	0.185321	0.727942	0.938727	0.510488	0.652755	0.97649	0.8757	0.91048	0.0276795	0.543225	0.889135	0.0338535	0.565351	0.0253817	0.682346	0.735995	0.528083	0.463561	0.498792	0.81922	0.761478	0.335765	0.610002	0.568426	0.262248	0.181871	0.915343	0.49256	0.17888	0.585832	6.6469e-64	0.367809	0.681177	0.44629	0.173368	0.562837	0.808509	0.768587	0.946429	0.8348	0.701311	0.154765	0.780739	0.881369	0.822194	0.127674	0.729603	0.00806753	0.168664
SADF_C1S2	0.440206	0.682948	0.794049	0.712042	0.976085	0.467087	0.391585	0.856359	0.927364	0.348007	0.382784	0.661664	0.515246	0.808376	0.53161	0.548534	0.344015	0.314753	0.697556	0.62681	0.69686	0.315943	0.54738	0.557226	0.59307	0.37022	0.194666	0.581134	0.798711	0.0273156	0.367809	0	0.419042	0.622188	0.368005	0.763034	0.921472	0.355796	0.673123	0.54671	0.467603	0.411907	0.777852	0.347303	0.647696	0.711085	0.656987	0.526586	0.119226
SNDF_C1S2	0.24597	0.735526	0.690989	0.180251	0.614214	0.109499	0.0951088	0.296223	0.55857	0.609038	0.678152	0.876467	0.5411	0.0503234	0.888045	0.882011	0.616907	0.0953705	0.332622	0.614604	0.343295	0.698345	0.0663764	0.065181	0.650363	0.508673	0.923449	0.13218	0.426746	0.967515	0.681177	0.419042	0	0.992672	0.279791	0.386958	0.839044	0.256102	0.98197	0.0512546	0.0971034	0.656089	0.988681	0.591165	0.661705	0.571259	0.248276	0.85445	0.281263
SMois_C1S2	0.647318	0.161776	0.287654	0.393679	0.665246	0.0639452	0.0915141	0.758354	0.46848	0.020158	0.00764925	0.597236	0.348786	0.606789	0.0595168	0.795432	0.111076	0.751974	0.0964641	0.452423	0.713297	0.522319	0.0857116	0.123197	0.0198045	0.0302293	0.127847	0.156777	0.0423277	0.259393	0.44629	0.622188	0.992672	0	0.854492	0.103797	0.56459	0.871239	0.770376	0.0458894	0.0372291	0.234493	0.730166	0.00687264	0.00348855	0.732471	0.247428	0.139724	0.863466
PH_C1S3	1.92952e-06	0.137901	0.634509	0.889659	0.507645	0.708354	0.597805	0.116129	0.800704	0.976911	0.742385	0.195322	0.732672	0.348786	0.214746	0.0143025	0.984586	0.000326111	0.506762	0.38045	0.227129	0.183043	0.975605	0.94775	0.467366	0.0675571	0.58366	0.808706	0.227836	0.422088	0.173368	0.368005	0.279791	0.854492	0	0.195556	0.389716	0.511098	0.222796	0.810835	0.58802	0.199553	0.281418	0.919615	0.946995	0.0795602	0.749965	0.968627	0.141192
NoL_C1S3	0.160194	7.35695e-05	0.430106	0.0182312	0.253334	0.00864734	0.00678306	0.5906	0.525732	0.139229	0.259726	0.747197	0.848339	0.490958	0.626352	0.323309	0.937374	0.271857	0.000777584	0.759544	0.669594	0.186597	0.0662666	0.0582493	0.702612	0.252317	0.0324191	0.0206216	0.398527	0.0951783	0.562837	0.763034	0.386958	0.103797	0.195556	0	0.291132	0.0295294	0.275837	0.0100121	0.0102518	0.594955	0.694014	0.100501	0.183536	0.844967	0.889913	0.632733	0.108211
LA_C1S3	0.561641	0.398369	5.87332e-05	0.27463	0.400712	0.664109	0.604583	0.000864025	0.328157	0.159229	0.183046	0.628743	0.351343	0.893378	0.25696	0.875014	0.193362	0.722338	0.969063	0.189548	0.251664	0.621469	0.800886	0.989039	0.961631	0.146489	0.16898	0.0669293	0.0868831	0.632279	0.808509	0.921472	0.839044	0.56459	0.389716	0.291132	0	0.60736	0.0146427	0.594439	0.553424	0.907465	0.0631743	0.228993	0.111722	0.630405	0.400735	0.576724	0.623493
Br_C1S3	0.620129	0.0466613	0.974517	0.0226874	0.0568361	0.134107	0.10391	0.742495	0.727659	0.725301	0.545953	0.709826	0.100391	0.203204	0.528582	0.48069	0.0532602	0.685115	0.0376281	0.879858	0.0755558	0.00235955	0.353754	0.292977	0.177046	0.728662	0.651207	0.242503	0.545037	0.11739	0.768587	0.355796	0.256102	0.871239	0.511098	0.0295294	0.60736	0	0.155251	0.166443	0.228239	0.512894	0.739316	0.851652	0.671173	0.827549	0.311861	0.850031	0.0257162
ID_C1S3	0.301507	0.175736	0.0452806	0.0706489	0.00539724	0.528479	0.484525	0.0873662	0.579404	0.615528	0.858855	0.492866	0.482879	0.800495	0.943	0.485504	0.790388	0.629355	0.981469	0.17713	0.388598	0.0740721	0.759696	0.752252	0.716005	0.529803	0.328097	0.180255	0.729268	0.757939	0.946429	0.673123	0.98197	0.770376	0.222796	0.275837	0.0146427	0.155251	0	0.709821	0.766527	0.839397	0.687688	0.682501	0.80935	0.321097	0.257538	0.512352	0.387113
FW_C1S3	0.74841	0.0493348	0.589073	0.0244517	0.758744	9.23821e-06	3.98598e-06	0.844616	0.574328	0.103325	0.174572	0.997607	0.880236	0.20148	0.505758	0.402537	0.745948	0.984548	0.0178463	0.946314	0.713331	0.633784	0.000691184	0.00153336	0.30144	0.240754	0.401334	0.0490189	0.556232	0.0939931	0.8348	0.54671	0.0512546	0.0458894	0.810835	0.0100121	0.594439	0.166443	0.709821	6.6469e-64	1.56074e-07	0.443674	0.514142	0.102972	0.0932719	0.98016	0.951874	0.499104	0.0843675
DW_C1S3	0.546442	0.055992	0.548143	0.0612154	0.947118	8.33176e-05	1.48621e-05	0.98729	0.51407	0.115362	0.168545	0.923087	0.963711	0.300126	0.568904	0.306805	0.620732	0.751236	0.0217914	0.821162	0.885575	0.704587	0.000591645	0.000807448	0.202343	0.137446	0.441501	0.0604658	0.401602	0.0725828	0.701311	0.467603	0.0971034	0.0372291	0.58802	0.0102518	0.553424	0.228239	0.766527	1.56074e-07	1.0635e-62	0.273959	0.326707	0.12685	0.0832723	0.896995	0.942619	0.498714	0.0608873
LCP_C1S3	0.124557	0.591793	0.701678	0.576725	0.452913	0.495976	0.323436	0.776556	0.344524	0.826123	0.898048	0.683111	0.0842226	0.528014	0.688472	0.348964	0.44208	0.280509	0.929738	0.218138	0.164275	0.4024	0.10887	0.132984	0.00575061	0.15123	0.918873	0.716736	0.404724	0.269894	0.154765	0.411907	0.656089	0.234493	0.199553	0.594955	0.907465	0.512894	0.839397	0.443674	0.273959	0	0.453223	0.862223	0.676129	0.772414	0.308683	0.76951	0.626577
LCF_C1S3	0.479162	0.922686	0.123133	0.811189	0.25297	0.774043	0.60832	0.0215648	0.596983	0.456846	0.30969	0.937565	0.731721	1	0.909222	0.502001	0.0898224	0.407574	0.881617	0.157621	0.212074	0.652686	0.756292	0.460395	0.559841	0.0998752	0.955142	0.522555	0.110589	0.963821	0.780739	0.777852	0.988681	0.730166	0.281418	0.694014	0.0631743	0.739316	0.687688	0.514142	0.326707	0.453223	0	0.779727	0.246769	0.842023	0.723661	0.465872	0.349469
LADF_C1S3	0.872395	0.130423	0.155804	0.152053	0.717659	0.105651	0.188445	0.38122	0.700943	5.6734e-06	0.000367629	0.398857	0.211291	0.98189	0.0342555	0.777006	0.0374624	0.870043	0.207947	0.731779	0.445437	0.572807	0.351297	0.451728	0.175172	0.128322	0.00489018	0.0423336	0.0968645	0.846982	0.881369	0.347303	0.591165	0.00687264	0.919615	0.100501	0.228993	0.851652	0.682501	0.102972	0.12685	0.862223	0.779727	0	0.000302303	0.626985	0.235306	0.545104	0.663455
LNDF_C1S3	0.891536	0.370644	0.0658991	0.39475	0.815834	0.171661	0.230087	0.194048	0.339763	0.00056098	5.60255e-06	0.284147	0.227639	0.628744	0.0486145	0.704405	0.0115341	0.891925	0.307171	0.892436	0.31952	0.503584	0.34058	0.330185	0.100523	0.019523	0.0601184	0.0384798	0.00687019	0.862067	0.822194	0.647696	0.661705	0.00348855	0.946995	0.183536	0.111722	0.671173	0.80935	0.0932719	0.0832723	0.676129	0.246769	0.000302303	0	0.486922	0.342904	0.335097	0.948526
LMois_C1S3	0.0922458	0.719274	0.780739	0.956307	0.2889	0.887664	0.996921	0.364552	0.732295	0.648855	0.862435	0.000739297	0.441681	0.0812354	0.281066	0.145	0.885553	0.284709	0.944912	0.83272	0.0905544	0.266932	0.542527	0.429154	0.282684	0.0447187	0.856956	0.893626	0.133926	0.508021	0.127674	0.711085	0.571259	0.732471	0.0795602	0.844967	0.630405	0.827549	0.321097	0.98016	0.896995	0.772414	0.842023	0.626985	0.486922	0	0.24223	0.219601	0.411716
SCP_C1S3	0.541952	0.681288	0.12904	0.681624	0.466418	0.774437	0.887234	0.392624	0.902914	0.24	0.553077	0.384813	0.00700911	0.342734	0.213588	0.924039	0.274204	0.883046	0.393361	0.963809	0.0379819	0.567376	0.855914	0.546224	0.052353	0.199359	0.447	0.813946	0.368611	0.631696	0.729603	0.656987	0.248276	0.247428	0.749965	0.889913	0.400735	0.311861	0.257538	0.951874	0.942619	0.308683	0.723661	0.235306	0.342904	0.24223	0	0.888761	0.326498
SCF_C1S3	0.955776	0.912248	0.737894	0.824298	0.894585	0.704101	0.755799	0.417915	0.10872	0.963956	0.45457	0.078273	0.952653	0.0805929	0.907462	0.630416	0.692099	0.799087	0.244361	0.23043	0.635552	0.532016	0.520522	0.541124	0.353598	0.258779	0.89611	0.477213	0.169132	0.668475	0.00806753	0.526586	0.85445	0.139724	0.968627	0.632733	0.576724	0.850031	0.512352	0.499104	0.498714	0.76951	0.465872	0.545104	0.335097	0.219601	0.888761	0	0.34934
SADF_C1S3	0.272121	0.286164	0.943567	0.335518	0.473531	0.147514	0.0781664	0.942365	0.263041	0.6384	0.707012	0.532952	0.288943	0.788334	0.21728	0.134192	0.241064	0.413864	0.123813	0.550312	0.574662	0.0238333	0.173084	0.0990927	0.95552	0.325287	0.669357	0.298833	0.623444	0.126849	0.168664	0.119226	0.281263	0.863466	0.141192	0.108211	0.623493	0.0257162	0.387113	0.0843675	0.0608873	0.626577	0.349469	0.663455	0.948526	0.411716	0.326498	0.34934	0
SNDF_C1S3	0.0733038	0.817356	0.266837	0.896034	0.640523	0.936873	0.905924	0.835971	0.415847	0.449366	0.170773	0.338789	0.515775	0.987659	0.000531308	0.000614762	0.402164	0.0992793	0.951598	0.689816	0.505253	0.195731	0.732899	0.71002	0.895554	0.698792	0.372341	0.386481	0.75005	0.940069	0.698323	0.756981	0.975605	0.213347	0.0460207	0.954807	0.65386	0.674965	0.662921	0.925207	0.947305	0.837613	0.58377	0.275341	0.316412	0.0912227	0.524846	0.704509	0.175872
SMois_C1S3	0.845878	0.723218	0.127831	0.840418	0.529855	0.687732	0.732547	0.108294	0.804753	0.867651	0.69672	0.778322	0.589879	0.454698	0.941151	0.655907	0.608837	0.471755	0.837353	0.819431	0.918893	0.719841	0.422655	0.676486	0.814056	0.239957	0.571214	0.84633	0.152497	0.678012	0.978727	0.0930423	0.194932	0.789538	0.552616	0.897042	0.0937009	0.887054	0.591553	0.810052	0.943597	0.707257	0.0852464	0.747498	0.621999	0.835918	0.987813	0.963452	0.512935
[truncated: 2 more columns]
