# Supplementary material
Source: MDPI journal article supplement (https://www.mdpi.com/2071-1050/15/14/11446)
Supplement: s1 [file s1 › Supplementary Table S5.xlsx]

## Sheet: CORR-MAT
Supplementary Table S5 Correlation Matrix for the cutting 3 x spacing 1, 2, and 3 during first growing season (year 1) for all the 17 traits of 10 Quinoa genotypes
Note: This file has 2 sheets; the first sheet is correlation matrix and the second sheet contains p-values (<0.05 and <0.01). In p-values: the red ones are significant at <0.05 and green at <0.01).
	PH_C3S1	NoL_C3S1	LA_C3S1	Br_C3S1	ID_C3S1	FW_C3S1	DW_C3S1	LCP_C3S1	LCF_C3S1	LADF_C3S1	LNDF_C3S1	LMois_C3S1	SCP_C3S1	SCF_C3S1	SADF_C3S1	SNDF_C3S1	SMois_C3S1	PH_C3S2	NoL_C3S2	LA_C3S2	Br_C3S2	ID_C3S2	FW_C3S2	DW_C3S2	LCP_C3S2	LCF_C3S2	LADF_C3S2	LNDF_C3S2	LMois_C3S2	SCP_C3S2	SCF_C3S2	SADF_C3S2	SNDF_C3S2	SMois_C3S2	PH_C3S3	NoL_C3S3	LA_C3S3	Br_C3S3	ID_C3S3	FW_C3S3	DW_C3S3	LCP_C3S3	LCF_C3S3	LADF_C3S3	LNDF_C3S3	LMois_C3S3	SCP_C3S3	SCF_C3S3	SADF_C3S3
PH_C3S1
NoL_C3S1	0.651637
LA_C3S1	0.32312	0.49613
Br_C3S1	0.767769	0.793135	0.0191955
ID_C3S1	0.853782	0.823131	0.524504	0.746418
FW_C3S1	0.66345	0.852917	0.363832	0.775418	0.884761
DW_C3S1	0.711979	0.835957	0.366599	0.785396	0.926976	0.977431
LCP_C3S1	0.427762	0.345101	0.153405	0.502216	0.234461	0.163448	0.226425
LCF_C3S1	-0.307034	-0.36036	-0.427407	-0.0362081	-0.373086	-0.312601	-0.385129	-0.0955001
LADF_C3S1	-0.448226	-0.533565	-0.650773	-0.315375	-0.553368	-0.503779	-0.549315	-0.637302	0.563974
LNDF_C3S1	-0.280753	-0.506123	-0.935245	0.00975385	-0.464931	-0.358711	-0.351788	-0.206353	0.565961	0.767658
LMois_C3S1	-0.512849	-0.123466	-0.282051	-0.231344	-0.295852	-0.113848	-0.0856082	-0.0411867	-0.261252	-0.171551	0.0335343
SCP_C3S1	-0.383909	-0.0368406	-0.607199	0.0768695	-0.307922	-0.0160549	-0.0267682	-0.224195	0.0232877	0.489216	0.589776	0.348656
SCF_C3S1	0.0553447	0.380521	-0.00862355	0.273743	0.133214	0.31626	0.291776	0.0597063	-0.0415173	0.0453126	-0.039461	-0.0302139	0.481574
SADF_C3S1	-0.120754	-0.0671805	-0.141038	-0.143748	-0.198599	-0.360816	-0.283492	0.119613	-0.0587482	0.0549324	-0.0272526	0.348757	0.0216244	0.324365
SNDF_C3S1	0.209819	-0.0315732	-0.395762	0.330975	-0.0145188	-0.0177386	0.103102	0.547578	-0.123642	-0.0356829	0.414568	-0.00653274	0.448231	0.298266	0.101601
SMois_C3S1	0.288546	0.336805	0.423241	0.104236	0.582807	0.367934	0.481344	-0.224867	-0.548586	-0.304796	-0.374738	0.176842	-0.181344	-0.256872	0.0151017	-0.191721
PH_C3S2	0.977433	0.632145	0.372811	0.700124	0.838243	0.680075	0.713909	0.388914	-0.339905	-0.4802	-0.356434	-0.52058	-0.407399	0.164397	-0.10672	0.174709	0.224587
NoL_C3S2	0.608247	0.927728	0.556727	0.743498	0.861473	0.899183	0.912068	0.353702	-0.327973	-0.600403	-0.512887	-0.133538	-0.0393989	0.429749	-0.173554	0.0722855	0.391808	0.611201
LA_C3S2	0.257424	0.433577	0.926716	-0.110807	0.46466	0.312608	0.327194	-0.0616818	-0.61243	-0.523987	-0.906347	-0.189402	-0.441482	0.134866	0.00539452	-0.373037	0.505283	0.33764	0.475021
Br_C3S2	0.809118	0.502843	0.0429037	0.783111	0.813679	0.721293	0.783405	0.26939	-0.109219	-0.332256	0.0304726	-0.246204	-0.196224	-0.137762	-0.331301	0.223302	0.423265	0.740592	0.558686	-0.0701193
ID_C3S2	0.827444	0.808889	0.644725	0.644431	0.957892	0.837614	0.859267	0.210777	-0.359948	-0.559409	-0.593753	-0.395286	-0.392643	0.274245	-0.119048	-0.0946295	0.471832	0.860608	0.851217	0.607745	0.660921
FW_C3S2	0.601894	0.690246	0.266456	0.693869	0.792653	0.930979	0.932473	0.2388	-0.272415	-0.535488	-0.288641	-0.0533753	0.00506727	0.433676	-0.285728	0.162204	0.243645	0.661983	0.828268	0.232148	0.690649	0.773944
DW_C3S2	0.731815	0.702991	0.34443	0.737413	0.889806	0.896501	0.941418	0.358994	-0.285771	-0.63048	-0.346097	-0.0986174	-0.19063	0.276503	-0.192203	0.177505	0.385717	0.758312	0.838616	0.268968	0.808362	0.849035	0.95232
LCP_C3S2	0.283396	0.247262	-0.108337	0.483614	0.198099	0.0754113	0.173549	0.78129	0.0437771	-0.44776	0.0324626	0.290755	-0.157285	-0.189173	0.325182	0.389518	0.07395	0.165312	0.212849	-0.311306	0.377496	0.0594353	0.092082	0.285076
LCF_C3S2	0.199438	-0.15196	-0.295366	0.093704	-0.0847239	-0.419475	-0.315994	0.234449	0.18538	0.226783	0.292558	-0.0768794	-0.181341	-0.228583	0.645951	0.207085	0.0625251	0.0866547	-0.312391	-0.302531	0.0855805	-0.137252	-0.461336	-0.239306	0.539321
LADF_C3S2	-0.421367	-0.674785	-0.685605	-0.338133	-0.508753	-0.380603	-0.360312	-0.118654	0.15756	0.181365	0.547312	0.55623	0.169509	-0.424771	-0.0428513	0.157058	-0.176418	-0.432976	-0.624897	-0.666832	-0.0313174	-0.639451	-0.214287	-0.238683	0.148094	0.0309338
LNDF_C3S2	-0.0652425	-0.684921	-0.600209	-0.259859	-0.482168	-0.700282	-0.622359	0.0318627	0.282387	0.492092	0.627731	-0.156114	-0.0270611	-0.384704	0.266675	0.372633	-0.261968	-0.131519	-0.752936	-0.565813	-0.0719557	-0.534318	-0.618758	-0.501399	0.170447	0.712471	0.464696
LMois_C3S2	0.399715	0.228881	0.259281	0.335898	0.311304	0.12505	0.202617	0.758918	0.113794	-0.587433	-0.3095	-0.0530101	-0.545688	0.0793822	0.390403	0.218035	-0.0602607	0.407712	0.306426	0.0637085	0.285627	0.359902	0.269507	0.455689	0.713832	0.368947	-0.114724	0.0279046
SCP_C3S2	-0.202193	-0.338074	0.074854	-0.449741	-0.167372	-0.333938	-0.183457	-0.0769362	-0.597664	-0.103395	-0.0685682	0.310055	0.116378	-0.268299	0.101908	0.330389	0.494624	-0.230752	-0.228149	0.239643	-0.161358	-0.23826	-0.274545	-0.201494	-0.028041	0.0676368	0.225262	0.249183	-0.208747
SCF_C3S2	-0.0365901	0.13854	-0.0738982	0.0869728	0.104812	0.361157	0.306839	-0.0483833	-0.00599836	-0.194864	-0.117257	0.31047	0.12504	0.628707	0.198479	-0.0387294	-0.218532	0.123824	0.239435	0.0198419	0.00423815	0.218386	0.577946	0.429792	-0.140331	-0.419295	0.14614	-0.417773	0.219846	-0.362588
SADF_C3S2	-0.598107	-0.640811	-0.513062	-0.448631	-0.622432	-0.653622	-0.636811	-0.406215	0.685761	0.811359	0.64507	-0.0437646	0.334102	0.104469	0.301544	0.0640896	-0.28407	-0.617984	-0.567717	-0.457437	-0.446378	-0.591408	-0.560867	-0.580348	-0.192173	0.318128	0.191892	0.479101	-0.167624	0.0150759	-0.0973711
SNDF_C3S2	-0.0357052	-0.570266	-0.226815	-0.256337	-0.264207	-0.535936	-0.376318	0.226571	0.110611	0.156964	0.358275	-0.172049	-0.0734229	-0.251679	0.159664	0.598298	0.0061952	-0.0852574	-0.405402	-0.236627	0.0129127	-0.30566	-0.355874	-0.200532	0.236371	0.471283	0.278702	0.729427	0.252605	0.575689	-0.392634	0.440578
SMois_C3S2	0.570054	0.729872	0.586858	0.515377	0.735825	0.662463	0.739072	0.29772	-0.55064	-0.492819	-0.489225	-0.2534	0.0502005	0.457797	-0.102398	0.321583	0.468225	0.580919	0.844418	0.617796	0.39944	0.752236	0.632197	0.65696	0.0389349	-0.232469	-0.685819	-0.524029	0.164546	0.201483	0.0264165	-0.442956	-0.0418963
PH_C3S3	0.98826	0.702948	0.392551	0.78564	0.862346	0.705982	0.740243	0.492684	-0.292924	-0.520425	-0.352293	-0.523198	-0.397966	0.117448	-0.155957	0.201187	0.223357	0.980123	0.675498	0.300286	0.775874	0.856975	0.654754	0.767043	0.283802	0.108228	-0.47473	-0.163775	0.4485	-0.262187	0.0218465	-0.639482	-0.0910134	0.610673
NoL_C3S3	0.544101	0.925674	0.518077	0.748953	0.836617	0.873828	0.882517	0.347997	-0.246596	-0.595724	-0.485556	-0.023007	-0.0662532	0.31293	-0.144113	-0.0268178	0.436439	0.517572	0.972807	0.397445	0.568016	0.792053	0.768069	0.802153	0.329372	-0.242347	-0.557344	-0.756963	0.332575	-0.276258	0.191239	-0.54248	-0.456925	0.733929	0.60545
LA_C3S3	0.421217	0.375863	0.863781	0.00556244	0.617768	0.34812	0.43057	-0.0125117	-0.529637	-0.503411	-0.750389	-0.302048	-0.517206	-0.0280699	-0.0634157	-0.20307	0.700661	0.453821	0.503198	0.892097	0.232283	0.68983	0.29903	0.425078	-0.151998	-0.132006	-0.581041	-0.380915	0.186304	0.363888	-0.129022	-0.361387	0.0746712	0.689092	0.43061	0.434774
Br_C3S3	0.727971	0.697387	-0.0076678	0.974095	0.711086	0.739975	0.749882	0.520312	0.0983773	-0.304701	0.0756097	-0.267232	0.0143399	0.150037	-0.266559	0.325142	0.0690648	0.649135	0.693701	-0.19877	0.828604	0.589384	0.678084	0.73545	0.518592	0.0656539	-0.242563	-0.21603	0.374132	-0.470537	0.0423267	-0.392874	-0.172003	0.435321	0.749875	0.715228	-0.0259801
ID_C3S3	0.856044	0.852517	0.589913	0.745703	0.946963	0.80901	0.830888	0.342953	-0.24471	-0.552059	-0.536637	-0.405705	-0.403963	0.256807	-0.0478452	-0.056717	0.399989	0.859544	0.858665	0.499594	0.683731	0.973122	0.724165	0.828398	0.232231	0.00753948	-0.662582	-0.475875	0.473442	-0.342451	0.151431	-0.556777	-0.293864	0.706389	0.887979	0.828924	0.591683	0.697295
FW_C3S3	0.537926	0.781095	0.298921	0.724257	0.828739	0.9769	0.956074	0.103907	-0.210441	-0.463553	-0.288948	-0.00397067	0.0295877	0.29814	-0.365705	-0.0493511	0.384737	0.5512	0.870451	0.232753	0.706497	0.763608	0.93323	0.892231	0.0964127	-0.459485	-0.273688	-0.727657	0.127838	-0.337804	0.421733	-0.549655	-0.524012	0.588724	0.58153	0.871866	0.294421	0.715647	0.734828
DW_C3S3	-0.130646	0.292161	0.478605	0.0442676	0.240966	0.425626	0.331272	-0.0238827	0.222301	-0.388286	-0.460079	0.0838998	-0.277201	0.0989109	-0.332452	-0.527686	0.0204146	-0.0604246	0.443716	0.29868	0.0263687	0.307826	0.437632	0.370964	-0.0809628	-0.630228	-0.165786	-0.769996	0.214248	-0.444004	0.444888	-0.187215	-0.515514	0.089524	-0.0230804	0.504306	0.210054	0.126552	0.285501	0.530405
LCP_C3S3	0.230556	0.031614	-0.277271	0.36793	0.0247924	-0.167229	-0.0542401	0.700775	0.157732	-0.194625	0.242743	0.164329	-0.1166	-0.261573	0.392475	0.471893	-0.0137825	0.0932502	-0.0304449	-0.448826	0.293593	-0.113582	-0.148477	0.0640069	0.942251	0.744019	0.202176	0.470261	0.62713	0.0436716	-0.31691	0.0283209	0.447969	-0.0980028	0.199032	0.0730135	-0.246605	0.407226	0.0702092	-0.16159	-0.339626
LCF_C3S3	-0.0672762	-0.34527	-0.501925	0.0335717	-0.194701	-0.30358	-0.15015	0.371707	-0.0309267	-0.033256	0.472005	0.416377	0.186023	-0.364246	0.191948	0.637659	0.136805	-0.184372	-0.275881	-0.54091	0.219878	-0.394663	-0.18601	-0.0460743	0.656954	0.473077	0.617363	0.572601	0.233221	0.524989	-0.284469	0.157166	0.68293	-0.157656	-0.134606	-0.213693	-0.268703	0.100844	-0.328878	-0.244131	-0.473939	0.746919
LADF_C3S3	-0.452254	-0.534151	-0.850384	-0.181916	-0.512207	-0.392054	-0.406183	-0.532722	0.502347	0.89384	0.92613	0.105724	0.639996	-0.0687168	-0.0416133	0.151394	-0.205671	-0.520955	-0.55864	-0.750479	-0.120317	-0.628724	-0.388233	-0.478799	-0.216377	0.18437	0.487048	0.499764	-0.572601	0.00813176	-0.151291	0.712563	0.20677	-0.515542	-0.536941	-0.516463	-0.648344	-0.138587	-0.615917	-0.306507	-0.393582	-0.0105665	0.298075
LNDF_C3S3	0.0897984	-0.138632	-0.632928	0.255122	-0.169393	-0.121745	-0.119257	-0.101291	0.326434	0.701302	0.769604	-0.405744	0.608154	0.295148	-0.0713385	0.552161	-0.368381	0.0395602	-0.18553	-0.55066	0.0935448	-0.216904	-0.115892	-0.194799	-0.159385	0.243677	-0.0128952	0.481984	-0.350874	-0.107439	-0.203712	0.452963	0.285282	-0.00605689	0.039303	-0.268434	-0.450577	0.237902	-0.176506	-0.166427	-0.60502	0.0643596	0.141598	0.683711
LMois_C3S3	0.196032	0.128143	-0.102083	0.0909883	0.0411666	0.0522552	0.0709381	0.0855415	-0.692815	-0.18755	-0.0510735	0.270242	0.164641	-0.30571	-0.0871274	0.167189	0.21438	0.138906	-0.0798301	0.0185697	0.102213	-0.0826628	-0.0879397	-0.0924495	0.0880972	0.0637364	0.187033	0.135121	-0.370247	0.407715	-0.323221	-0.567125	-0.123293	0.045274	0.140189	-0.0900319	-0.0768279	-0.00674243	-0.111491	-0.0619345	-0.548963	0.0979226	0.253652	-0.0391942	0.0345887
SCP_C3S3	-0.175713	0.232265	-0.184405	0.148443	-0.0207548	0.253585	0.249518	-0.124878	-0.245332	0.174493	0.181071	0.187875	0.855355	0.742288	-0.0271721	0.448793	-0.0693913	-0.130477	0.308613	0.0041804	-0.154275	-0.0152818	0.309619	0.0981897	-0.299492	-0.438595	-0.1723	-0.354949	-0.414571	0.154027	0.307051	0.0857712	-0.159053	0.466077	-0.14447	0.20167	-0.114917	0.0493636	-0.0841168	0.259033	-0.079051	-0.349765	-0.0865941	0.233761	0.433442	0.0772069
SCF_C3S3	0.675292	0.499586	0.458498	0.460067	0.806866	0.640671	0.722747	0.174309	-0.22076	-0.464651	-0.409358	-0.273455	-0.376384	0.325344	0.0894033	0.074944	0.463998	0.733652	0.668221	0.458044	0.626028	0.858201	0.739163	0.845325	0.114125	-0.0207721	-0.379013	-0.318834	0.532196	-0.0819549	0.397979	-0.284073	0.0380131	0.637223	0.686507	0.600473	0.657576	0.442245	0.813312	0.631187	0.268881	-0.0140565	-0.139457	-0.483621	-0.203064	-0.348091	-0.0310537
SADF_C3S3	-0.300045	-0.330143	-0.010076	-0.511749	-0.335252	-0.38425	-0.304881	0.0165874	-0.418296	-0.160633	-0.20471	0.47864	0.0304752	0.288361	0.678359	0.185855	0.000692518	-0.187103	-0.281505	0.219656	-0.481447	-0.215185	-0.164255	-0.169454	-0.0359596	0.101478	0.225412	0.145995	0.187544	0.495708	0.407392	0.0921496	0.260314	-0.0400959	-0.307458	-0.350826	0.097591	-0.610862	-0.294283	-0.385506	-0.229624	-0.0260161	0.181485	-0.193794	-0.278286	0.0685618	0.154298	0.0709593
SNDF_C3S3	0.17655	-0.225411	-0.513364	0.0858754	-0.180589	-0.328348	-0.213372	0.23194	-0.103482	0.282156	0.463942	-0.0508002	0.317853	0.270617	0.54842	0.738051	-0.175877	0.157824	-0.281342	-0.344405	0.00865447	-0.190466	-0.194242	-0.137846	0.220698	0.624446	0.137828	0.695449	0.130362	0.298895	-0.0658763	0.282433	0.586258	0.0292978	0.103853	-0.372372	-0.23875	0.00157736	-0.150742	-0.402807	-0.85814	0.43333	0.498157	0.294719	0.614294	0.225332	0.218672	0.0132242	0.431396
SMois_C3S3	0.0730733	0.623688	0.30518	0.42548	0.347652	0.451249	0.478143	0.3327	-0.348695	-0.411412	-0.265263	0.267221	0.324332	0.100997	-0.214268	0.180189	0.361109	-0.0208114	0.639988	0.213143	0.167399	0.221618	0.297053	0.287791	0.339875	-0.258888	-0.340145	-0.576528	-0.0449109	0.170362	-0.234142	-0.383652	-0.255126	0.586565	0.122655	0.689775	0.192148	0.398022	0.26452	0.459838	0.218703	0.159811	0.117909	-0.244066	-0.137256	0.255224	0.427292	-0.025559	-0.288874
[truncated: 2 more columns]

## Sheet: p-values
	PH_C3S1	NoL_C3S1	LA_C3S1	Br_C3S1	ID_C3S1	FW_C3S1	DW_C3S1	LCP_C3S1	LCF_C3S1	LADF_C3S1	LNDF_C3S1	LMois_C3S1	SCP_C3S1	SCF_C3S1	SADF_C3S1	SNDF_C3S1	SMois_C3S1	PH_C3S2	NoL_C3S2	LA_C3S2	Br_C3S2	ID_C3S2	FW_C3S2	DW_C3S2	LCP_C3S2	LCF_C3S2	LADF_C3S2	LNDF_C3S2	LMois_C3S2	SCP_C3S2	SCF_C3S2	SADF_C3S2	SNDF_C3S2	SMois_C3S2	PH_C3S3	NoL_C3S3	LA_C3S3	Br_C3S3	ID_C3S3	FW_C3S3	DW_C3S3	LCP_C3S3	LCF_C3S3	LADF_C3S3	LNDF_C3S3	LMois_C3S3	SCP_C3S3	SCF_C3S3	SADF_C3S3
PH_C1S1	6.6469e-64	0.0412127	0.362464	0.00951065	0.00166984	0.0364856	0.020899	0.217512	0.388178	0.193883	0.432015	0.129559	0.273413	0.879304	0.739668	0.560699	0.418785	1.10419e-06	0.0620678	0.47274	0.00458069	0.00313193	0.0656076	0.0161311	0.427506	0.580672	0.225218	0.857888	0.252442	0.575345	0.920066	0.0677796	0.921994	0.0853351	8.19465e-08	0.103962	0.2254	0.0169888	0.00157336	0.108742	0.71904	0.521623	0.853498	0.189418	0.805142	0.587283	0.627278	0.0321296	0.399617
NoL_C1S1	0.0412127	0	0.144712	0.00618926	0.00343801	0.0017078	0.00258616	0.328754	0.30635	0.112199	0.135532	0.733997	0.919521	0.278027	0.853704	0.931002	0.34128	0.0498822	0.000109314	0.210638	0.138505	0.00460131	0.0271518	0.0233492	0.490987	0.675158	0.0323083	0.028859	0.524738	0.339349	0.702693	0.0458912	0.0851928	0.0165607	0.0233612	0.000121974	0.284439	0.0249728	0.00172559	0.00764037	0.412713	0.930913	0.328502	0.111731	0.702503	0.724245	0.518454	0.141495	0.351512
LA_C1S1	0.362464	0.144712	0	0.958025	0.119602	0.301367	0.297428	0.672214	0.217936	0.0415735	7.11087e-05	0.429798	0.0626428	0.981137	0.697543	0.2576	0.222944	0.288685	0.0946077	0.000115424	0.906321	0.0441609	0.456777	0.329759	0.765774	0.407366	0.0286359	0.0665684	0.469439	0.837171	0.839228	0.129373	0.528588	0.0745053	0.261833	0.125032	0.00127382	0.983228	0.0726374	0.401471	0.161706	0.437987	0.139344	0.00182268	0.0495127	0.779007	0.610053	0.182616	0.977961
Br_C1S1	0.00951065	0.00618926	0.958025	1.0635e-62	0.0131462	0.00840181	0.007097	0.139077	0.920898	0.374736	0.978665	0.520162	0.832838	0.444078	0.691969	0.350226	0.774445	0.0241704	0.0137093	0.760564	0.00738216	0.044289	0.0260307	0.0149363	0.156733	0.796813	0.339259	0.468413	0.342665	0.192197	0.81118	0.193432	0.474678	0.127357	0.00706703	0.0126706	0.987833	1.9095e-06	0.0132824	0.0178473	0.903354	0.295542	0.926645	0.614969	0.476849	0.802603	0.682342	0.18093	0.130524
ID_C1S1	0.00166984	0.00343801	0.119602	0.0131462	0	0.000669916	0.00011383	0.514393	0.2883	0.0970414	0.175762	0.406558	0.386736	0.713712	0.582298	0.968247	0.0770293	0.00245209	0.00135841	0.176047	0.00418278	1.30719e-05	0.00624322	0.000563622	0.583267	0.815991	0.133177	0.158158	0.381268	0.643959	0.773226	0.0546232	0.460729	0.0152686	0.00132595	0.00254693	0.057002	0.0211341	3.24633e-05	0.00304402	0.502443	0.9458	0.589874	0.130123	0.639904	0.910101	0.954618	0.00478679	0.343653
FW_C1S1	0.0364856	0.0017078	0.301367	0.00840181	0.000669916	0	1.10456e-06	0.651857	0.379181	0.137652	0.30873	0.754161	0.964889	0.373323	0.305692	0.961209	0.295538	0.030475	0.000399551	0.379169	0.0185537	0.00248846	9.12979e-05	0.000442325	0.835973	0.227527	0.277914	0.0241246	0.73069	0.345666	0.305203	0.040391	0.110311	0.036866	0.022513	0.000949548	0.324257	0.0144107	0.00459037	1.21163e-06	0.220068	0.644246	0.393812	0.262491	0.737596	0.886003	0.479599	0.0459539	0.27295
DW_C1S1	0.020899	0.00258616	0.297428	0.007097	0.00011383	1.10456e-06	0	0.529318	0.271761	0.100031	0.318835	0.814098	0.941486	0.413359	0.427343	0.776847	0.158974	0.0203972	0.00023496	0.35609	0.00734506	0.00144301	8.38e-05	4.79925e-05	0.63159	0.373747	0.306419	0.0546599	0.574527	0.611924	0.388495	0.0477056	0.28381	0.0145944	0.0143565	0.00072161	0.214177	0.0124995	0.00290209	1.54447e-05	0.349768	0.881698	0.678851	0.244126	0.742803	0.845601	0.486912	0.0182047	0.391684
LCP_C1S1	0.217512	0.328754	0.672214	0.139077	0.514393	0.651857	0.529318	6.6469e-64	0.792988	0.0474803	0.567339	0.910057	0.533489	0.869857	0.742058	0.10133	0.532231	0.266673	0.316024	0.865583	0.451645	0.558869	0.506409	0.308322	0.00761507	0.514415	0.744067	0.930371	0.0109179	0.832695	0.894409	0.244086	0.529044	0.403458	0.147964	0.324439	0.972635	0.123126	0.331975	0.775141	0.947786	0.0239823	0.290229	0.112875	0.780685	0.814241	0.73105	0.630075	0.963725
LCF_C1S1	0.388178	0.30635	0.217936	0.920898	0.2883	0.379181	0.271761	0.792988	0	0.0894899	0.0881181	0.465946	0.949086	0.909337	0.871931	0.733631	0.100575	0.336572	0.354878	0.0598072	0.763913	0.306943	0.446379	0.423474	0.904421	0.608132	0.663766	0.429225	0.754274	0.0680366	0.986879	0.0285849	0.760978	0.0990477	0.411436	0.492195	0.115372	0.78687	0.495618	0.559511	0.537044	0.663418	0.932413	0.138957	0.357276	0.0263536	0.494488	0.539943	0.228972
LADF_C1S1	0.193883	0.112199	0.0415735	0.374736	0.0970414	0.137652	0.100031	0.0474803	0.0894899	1.0635e-62	0.00952746	0.635583	0.151281	0.901082	0.880197	0.922043	0.391824	0.160113	0.0664572	0.120033	0.348251	0.0926921	0.110666	0.0506748	0.194404	0.528648	0.616059	0.148526	0.074151	0.776226	0.589556	0.00438198	0.664976	0.147835	0.12303	0.0691696	0.137987	0.391979	0.0980007	0.177217	0.267513	0.590022	0.927333	0.000487971	0.0238306	0.603863	0.629709	0.176057	0.657542
LNDF_C1S1	0.432015	0.135532	7.11087e-05	0.978665	0.175762	0.30873	0.318835	0.567339	0.0881181	0.00952746	0	0.926726	0.0727205	0.913813	0.940429	0.233578	0.286	0.312035	0.129526	0.000300199	0.933403	0.0703336	0.418625	0.327267	0.929063	0.41205	0.10153	0.0520016	0.38418	0.85071	0.746998	0.0440102	0.309363	0.151272	0.318092	0.154829	0.0124068	0.835546	0.109756	0.418107	0.180918	0.499198	0.168403	0.000119076	0.00923572	0.888568	0.616641	0.240102	0.570496
LMois_C1S1	0.129559	0.733997	0.429798	0.520162	0.406558	0.754161	0.814098	0.910057	0.465946	0.635583	0.926726	1.0635e-62	0.323462	0.933967	0.323311	0.98571	0.62503	0.122899	0.713039	0.600229	0.492905	0.258225	0.883574	0.78636	0.415069	0.832817	0.0949656	0.666702	0.884366	0.383282	0.382613	0.904448	0.634586	0.47993	0.120693	0.949699	0.396322	0.455418	0.244736	0.991314	0.817756	0.650081	0.231336	0.771297	0.244686	0.450158	0.603225	0.444576	0.161671
SCP_C1S1	0.273413	0.919521	0.0626428	0.832838	0.386736	0.964889	0.941486	0.533489	0.949086	0.151281	0.0727205	0.323462	0	0.158747	0.952719	0.193877	0.616099	0.24258	0.913949	0.201496	0.586908	0.26171	0.988916	0.597824	0.664325	0.616105	0.639671	0.940847	0.102755	0.748844	0.730712	0.345414	0.84025	0.890463	0.254717	0.855706	0.125779	0.968638	0.246963	0.935334	0.438108	0.748377	0.606867	0.0462573	0.0621185	0.649453	0.00160231	0.283718	0.933397
SCF_C1S1	0.879304	0.278027	0.981137	0.444078	0.713712	0.373323	0.413359	0.869857	0.909337	0.901082	0.913813	0.933967	0.158747	6.6469e-64	0.36051	0.402554	0.473724	0.649944	0.215149	0.710288	0.704301	0.44321	0.210522	0.439311	0.600677	0.525292	0.221097	0.272336	0.827442	0.45355	0.0515278	0.773953	0.48302	0.183372	0.746598	0.378652	0.938645	0.679083	0.47384	0.402764	0.785737	0.465378	0.300777	0.85039	0.407728	0.390332	0.0139474	0.358978	0.419097
SADF_C1S1	0.739668	0.853704	0.697543	0.691969	0.582298	0.305692	0.427343	0.742058	0.871931	0.880197	0.940429	0.323311	0.952719	0.36051	0	0.780027	0.966973	0.76919	0.63158	0.9882	0.349724	0.743243	0.423546	0.594747	0.359231	0.0436279	0.906435	0.456393	0.264685	0.779377	0.582531	0.397151	0.659503	0.778338	0.667022	0.691219	0.861835	0.456597	0.895578	0.298697	0.347949	0.261933	0.595245	0.909128	0.844739	0.810849	0.940605	0.805986	0.0310617
SNDF_C1S1	0.560699	0.931002	0.2576	0.350226	0.968247	0.961209	0.776847	0.10133	0.733631	0.922043	0.233578	0.98571	0.193877	0.402554	0.780027	6.6469e-64	0.595688	0.629278	0.842699	0.288369	0.535164	0.794842	0.654367	0.623712	0.265865	0.565933	0.664786	0.288932	0.545082	0.351133	0.915406	0.860379	0.0676684	0.364883	0.577288	0.941378	0.573654	0.359294	0.87633	0.892307	0.116968	0.168518	0.0473174	0.676311	0.0979262	0.644326	0.193251	0.836978	0.607198
SMois_C1S1	0.418785	0.34128	0.222944	0.774445	0.0770293	0.295538	0.158974	0.532231	0.100575	0.391824	0.286	0.62503	0.616099	0.473724	0.966973	0.595688	6.6469e-64	0.532756	0.262817	0.136289	0.222914	0.16858	0.497554	0.270968	0.839116	0.86376	0.625874	0.464679	0.868657	0.146128	0.544144	0.426361	0.986449	0.172311	0.53506	0.207301	0.024015	0.849639	0.252086	0.272291	0.955362	0.969856	0.706276	0.568648	0.294905	0.552009	0.848935	0.176746	0.998485
PH_C1S2	1.10419e-06	0.0498822	0.288685	0.0241704	0.00245209	0.030475	0.0203972	0.266673	0.336572	0.160113	0.312035	0.122899	0.24258	0.649944	0.76919	0.629278	0.532756	0	0.0604659	0.34001	0.0142862	0.00139115	0.0370516	0.0110194	0.648102	0.81186	0.211343	0.717227	0.242183	0.521259	0.73325	0.0568902	0.814849	0.0782246	6.6681e-07	0.125465	0.187698	0.042264	0.00143218	0.0986336	0.868303	0.79778	0.610119	0.122581	0.913597	0.701939	0.719391	0.0157319	0.604743
NoL_C1S2	0.0620678	0.000109314	0.0946077	0.0137093	0.00135841	0.000399551	0.00023496	0.316024	0.354878	0.0664572	0.129526	0.713039	0.913949	0.215149	0.63158	0.842699	0.262817	0.0604659	0	0.165322	0.093206	0.00178428	0.00307582	0.00243073	0.55492	0.379518	0.0533931	0.0119482	0.389165	0.5261	0.505245	0.0869168	0.245122	0.00211514	0.0320568	2.31497e-06	0.13818	0.0260821	0.00146675	0.00105089	0.198956	0.933463	0.440383	0.0932391	0.607836	0.82648	0.385615	0.0346853	0.43073
LA_C1S2	0.47274	0.210638	0.000115424	0.760564	0.176047	0.379169	0.35609	0.865583	0.0598072	0.120033	0.000300199	0.600229	0.201496	0.710288	0.9882	0.288369	0.136289	0.34001	0.165322	0	0.847366	0.0623431	0.51867	0.452382	0.381264	0.39553	0.0352031	0.0882195	0.861202	0.504864	0.956613	0.183762	0.5104	0.0569872	0.399221	0.255397	0.000519682	0.581967	0.141488	0.517551	0.40187	0.193215	0.106415	0.0123904	0.0990326	0.959393	0.990856	0.183105	0.542022
Br_C1S2	0.00458069	0.138505	0.906321	0.00738216	0.00418278	0.0185537	0.00734506	0.451645	0.763913	0.348251	0.933403	0.492905	0.586908	0.704301	0.349724	0.535164	0.222914	0.0142862	0.093206	0.847366	0	0.0374652	0.0270257	0.00464915	0.282182	0.814158	0.93156	0.843409	0.423718	0.656077	0.990729	0.195953	0.971758	0.252798	0.00833877	0.0867137	0.51842	0.0030531	0.0292503	0.0223711	0.942358	0.410319	0.541605	0.740585	0.797152	0.778731	0.670442	0.0528347	0.158873
ID_C1S2	0.00313193	0.00460131	0.0441609	0.044289	1.30719e-05	0.00248846	0.00144301	0.558869	0.306943	0.0926921	0.0703336	0.258225	0.26171	0.44321	0.743243	0.794842	0.16858	0.00139115	0.00178428	0.0623431	0.0374652	0	0.00860793	0.00188609	0.870444	0.705354	0.0465028	0.111598	0.307011	0.5074	0.54442	0.071735	0.390414	0.0120729	0.00153486	0.0063109	0.0272826	0.0729588	2.21053e-06	0.0101552	0.386892	0.754721	0.259045	0.0515195	0.547222	0.820406	0.966579	0.00148522	0.550481
FW_C1S2	0.0656076	0.0271518	0.456777	0.0260307	0.00624322	9.12979e-05	8.38e-05	0.506409	0.446379	0.110666	0.418625	0.883574	0.988916	0.210522	0.423546	0.654367	0.497554	0.0370516	0.00307582	0.51867	0.0270257	0.00860793	6.6469e-64	2.13426e-05	0.80027	0.179573	0.552186	0.0564911	0.45144	0.44269	0.0801305	0.0916617	0.312851	0.0498579	0.0399274	0.0094653	0.401292	0.0311566	0.017869	8.01825e-05	0.20592	0.682273	0.606893	0.267585	0.749864	0.809113	0.383987	0.0145758	0.65023
DW_C1S2	0.0161311	0.0233492	0.329759	0.0149363	0.000563622	0.000442325	4.79925e-05	0.308322	0.423474	0.0506748	0.327267	0.78636	0.597824	0.439311	0.594747	0.623712	0.270968	0.0110194	0.00243073	0.452382	0.00464915	0.00188609	2.13426e-05	1.0635e-62	0.424653	0.50548	0.506623	0.139826	0.185658	0.576696	0.215098	0.0785881	0.578556	0.0390346	0.00962092	0.00523941	0.220727	0.0153479	0.00306702	0.000517192	0.291269	0.860557	0.899426	0.161512	0.589682	0.799486	0.787269	0.00206866	0.639781
LCP_C1S2	0.427506	0.490987	0.765774	0.156733	0.583267	0.835973	0.63159	0.00761507	0.904421	0.194404	0.929063	0.415069	0.664325	0.600677	0.359231	0.265865	0.839116	0.648102	0.55492	0.381264	0.282182	0.870444	0.80027	0.424653	0	0.10765	0.683057	0.637792	0.0204169	0.938708	0.699	0.594805	0.510871	0.914959	0.426815	0.352707	0.675081	0.124591	0.518517	0.791047	0.82405	4.53677e-05	0.039037	0.548221	0.660068	0.808776	0.400529	0.753578	0.92144
LCF_C1S2	0.580672	0.675158	0.407366	0.796813	0.815991	0.227527	0.373747	0.514415	0.608132	0.528648	0.41205	0.832817	0.616105	0.525292	0.0436279	0.565933	0.86376	0.81186	0.379518	0.39553	0.814158	0.705354	0.179573	0.50548	0.10765	6.6469e-64	0.932397	0.0207704	0.294106	0.852719	0.227747	0.370351	0.169145	0.518076	0.766006	0.499921	0.716216	0.857	0.983508	0.181554	0.0507957	0.0136075	0.167304	0.610122	0.497495	0.861142	0.204807	0.954581	0.780288
LADF_C1S2	0.225218	0.0323083	0.0286359	0.339259	0.133177	0.277914	0.306419	0.744067	0.663766	0.616059	0.10153	0.0949656	0.639671	0.221097	0.906435	0.664786	0.625874	0.211343	0.0533931	0.0352031	0.93156	0.0465028	0.552186	0.506623	0.683057	0.932397	0	0.176009	0.752317	0.531492	0.68706	0.595355	0.435529	0.028566	0.165618	0.0941648	0.0781472	0.499526	0.03682	0.444174	0.647148	0.575378	0.0572117	0.153376	0.971796	0.60488	0.634085	0.280094	0.53121
LNDF_C1S2	0.857888	0.028859	0.0665684	0.468413	0.158158	0.0241246	0.0546599	0.930371	0.429225	0.148526	0.0520016	0.666702	0.940847	0.272336	0.456393	0.288932	0.464679	0.717227	0.0119482	0.0882195	0.843409	0.111598	0.0564911	0.139826	0.637792	0.0207704	0.176009	0	0.939006	0.487516	0.229616	0.16121	0.0166602	0.119997	0.651198	0.0112474	0.277489	0.548878	0.164456	0.0170602	0.00917768	0.1702	0.0836328	0.141331	0.158341	0.70976	0.3142	0.36923	0.687356
LMois_C1S2	0.252442	0.524738	0.469439	0.342665	0.381268	0.73069	0.574527	0.0109179	0.754274	0.074151	0.38418	0.884366	0.102755	0.827442	0.264685	0.545082	0.868657	0.242183	0.389165	0.861202	0.423718	0.307011	0.45144	0.185658	0.0204169	0.294106	0.752317	0.939006	0	0.562749	0.541665	0.643453	0.481356	0.649644	0.193578	0.347759	0.606314	0.286843	0.166931	0.72488	0.552259	0.0522947	0.516684	0.0836328	0.320181	0.292276	0.233574	0.113299	0.603875
SCP_C1S2	0.575345	0.339349	0.837171	0.192197	0.643959	0.345666	0.611924	0.832695	0.0680366	0.776226	0.85071	0.383282	0.748844	0.45355	0.779377	0.351133	0.146128	0.521259	0.5261	0.504864	0.656077	0.5074	0.44269	0.576696	0.938708	0.852719	0.531492	0.487516	0.562749	0	0.303148	0.967029	0.0815975	0.576717	0.464293	0.439733	0.301287	0.169915	0.33273	0.339759	0.198629	0.90465	0.119197	0.982213	0.767672	0.242179	0.670946	0.821923	0.145108
SCF_C1S2	0.920066	0.702693	0.839228	0.81118	0.773226	0.305203	0.388495	0.894409	0.986879	0.589556	0.746998	0.382613	0.730712	0.0515278	0.582531	0.915406	0.544144	0.73325	0.505245	0.956613	0.990729	0.54442	0.0801305	0.215098	0.699	0.227747	0.68706	0.229616	0.541665	0.303148	0	0.789009	0.261723	0.942254	0.952234	0.596632	0.722416	0.907576	0.676237	0.224772	0.19763	0.372288	0.425683	0.676522	0.572417	0.362306	0.388151	0.254701	0.242589
SADF_C1S2	0.0677796	0.0458912	0.129373	0.193432	0.0546232	0.040391	0.0477056	0.244086	0.0285849	0.00438198	0.0440102	0.904448	0.345414	0.773953	0.397151	0.860379	0.426361	0.0568902	0.0869168	0.183762	0.195953	0.071735	0.0916617	0.0785881	0.594805	0.370351	0.595355	0.16121	0.643453	0.967029	0.789009	1.0635e-62	0.202531	0.199818	0.046489	0.105204	0.304871	0.261405	0.0945719	0.0997783	0.604521	0.938098	0.664567	0.0207462	0.188639	0.0873208	0.81375	0.426355	0.800126
SNDF_C1S2	0.921994	0.0851928	0.528588	0.474678	0.460729	0.110311	0.28381	0.529044	0.760978	0.664976	0.309363	0.634586	0.84025	0.48302	0.659503	0.0676684	0.986449	0.814849	0.245122	0.5104	0.971758	0.390414	0.312851	0.578556	0.510871	0.169145	0.435529	0.0166602	0.481356	0.0815975	0.261723	0.202531	0	0.908513	0.802549	0.184316	0.837564	0.63468	0.409868	0.120012	0.127238	0.194171	0.0295158	0.566538	0.424303	0.734359	0.66074	0.916966	0.467607
SMois_C1S2	0.0853351	0.0165607	0.0745053	0.127357	0.0152686	0.036866	0.0145944	0.403458	0.0990477	0.147835	0.151272	0.47993	0.890463	0.183372	0.778338	0.364883	0.172311	0.0782246	0.00211514	0.0569872	0.252798	0.0120729	0.0498579	0.0390346	0.914959	0.518076	0.028566	0.119997	0.649644	0.576717	0.942254	0.199818	0.908513	6.6469e-64	0.06075	0.0156723	0.0275157	0.208601	0.0224007	0.0733606	0.805728	0.787666	0.663573	0.127214	0.986751	0.901166	0.174557	0.0475168	0.912431
PH_C1S3	8.19465e-08	0.0233612	0.261833	0.00706703	0.00132595	0.022513	0.0143565	0.147964	0.411436	0.12303	0.318092	0.120693	0.254717	0.746598	0.667022	0.577288	0.53506	6.6681e-07	0.0320568	0.399221	0.00833877	0.00153486	0.0399274	0.00962092	0.426815	0.766006	0.165618	0.651198	0.193578	0.464293	0.952234	0.046489	0.802549	0.06075	0	0.0636107	0.21413	0.0125009	0.00060057	0.0778367	0.949538	0.581458	0.710826	0.109517	0.914157	0.699292	0.690486	0.0283433	0.387488
NoL_C1S3	0.103962	0.000121974	0.125032	0.0126706	0.00254693	0.000949548	0.00072161	0.324439	0.492195	0.0691696	0.154829	0.949699	0.855706	0.378652	0.691219	0.941378	0.207301	0.125465	2.31497e-06	0.255397	0.0867137	0.0063109	0.0094653	0.00523941	0.352707	0.499921	0.0941648	0.0112474	0.347759	0.439733	0.596632	0.105204	0.184316	0.0156723	0.0636107	6.6469e-64	0.209238	0.020059	0.00303163	0.00100751	0.137174	0.841132	0.553313	0.126419	0.453315	0.804644	0.576355	0.0664174	0.320252
LA_C1S3	0.2254	0.284439	0.00127382	0.987833	0.057002	0.324257	0.214177	0.972635	0.115372	0.137987	0.0124068	0.396322	0.125779	0.938645	0.861835	0.573654	0.024015	0.187698	0.13818	0.000519682	0.51842	0.0272826	0.401292	0.220727	0.675081	0.716216	0.0781472	0.277489	0.606314	0.301287	0.722416	0.304871	0.837564	0.0275157	0.21413	0.209238	6.6469e-64	0.943207	0.0715693	0.408939	0.56025	0.492178	0.452845	0.0425999	0.19127	0.832927	0.751913	0.0387877	0.788541
Br_C1S3	0.0169888	0.0249728	0.983228	1.9095e-06	0.0211341	0.0144107	0.0124995	0.123126	0.78687	0.391979	0.835546	0.455418	0.968638	0.679083	0.456597	0.359294	0.849639	0.042264	0.0260821	0.581967	0.0030531	0.0729588	0.0311566	0.0153479	0.124591	0.857	0.499526	0.548878	0.286843	0.169915	0.907576	0.261405	0.63468	0.208601	0.0125009	0.020059	0.943207	0	0.0249999	0.0199522	0.727559	0.242801	0.781634	0.702597	0.508057	0.985252	0.89228	0.200626	0.0606483
ID_C1S3	0.00157336	0.00172559	0.0726374	0.0132824	3.24633e-05	0.00459037	0.00290209	0.331975	0.495618	0.0980007	0.109756	0.244736	0.246963	0.47384	0.895578	0.87633	0.252086	0.00143218	0.00146675	0.141488	0.0292503	2.21053e-06	0.017869	0.00306702	0.518517	0.983508	0.03682	0.164456	0.166931	0.33273	0.676237	0.0945719	0.409868	0.0224007	0.00060057	0.00303163	0.0715693	0.0249999	6.6469e-64	0.0154801	0.423932	0.847172	0.353472	0.0579645	0.6257	0.759122	0.817291	0.00421385	0.409168
FW_C1S3	0.108742	0.00764037	0.401471	0.0178473	0.00304402	1.21163e-06	1.54447e-05	0.775141	0.559511	0.177217	0.418107	0.991314	0.935334	0.402764	0.298697	0.892307	0.272291	0.0986336	0.00105089	0.517551	0.0223711	0.0101552	8.01825e-05	0.000517192	0.791047	0.181554	0.444174	0.0170602	0.72488	0.339759	0.224772	0.0997783	0.120012	0.0733606	0.0778367	0.00100751	0.408939	0.0199522	0.0154801	0	0.114747	0.655609	0.49667	0.389035	0.645859	0.865037	0.469879	0.0503373	0.271252
DW_C1S3	0.71904	0.412713	0.161706	0.903354	0.502443	0.220068	0.349768	0.947786	0.537044	0.267513	0.180918	0.817756	0.438108	0.785737	0.347949	0.116968	0.955362	0.868303	0.198956	0.40187	0.942358	0.386892	0.20592	0.291269	0.82405	0.0507957	0.647148	0.00917768	0.552259	0.198629	0.19763	0.604521	0.127238	0.805728	0.949538	0.137174	0.56025	0.727559	0.423932	0.114747	0	0.336994	0.166424	0.26047	0.0638497	0.100294	0.828153	0.452534	0.523355
LCP_C1S3	0.521623	0.930913	0.437987	0.295542	0.9458	0.644246	0.881698	0.0239823	0.663418	0.590022	0.499198	0.650081	0.748377	0.465378	0.261933	0.168518	0.969856	0.79778	0.933463	0.193215	0.410319	0.754721	0.682273	0.860557	4.53677e-05	0.0136075	0.575378	0.1702	0.0522947	0.90465	0.372288	0.938098	0.194171	0.787666	0.581458	0.841132	0.492178	0.242801	0.847172	0.655609	0.336994	0	0.0130512	0.976888	0.859795	0.787837	0.321818	0.969258	0.943128
LCF_C1S3	0.853498	0.328502	0.139344	0.926645	0.589874	0.393812	0.678851	0.290229	0.932413	0.927333	0.168403	0.231336	0.606867	0.300777	0.595245	0.0473174	0.706276	0.610119	0.440383	0.106415	0.541605	0.259045	0.606893	0.899426	0.039037	0.167304	0.0572117	0.0836328	0.516684	0.119197	0.425683	0.664567	0.0295158	0.663573	0.710826	0.553313	0.452845	0.781634	0.353472	0.49667	0.166424	0.0130512	6.6469e-64	0.402871	0.696391	0.47948	0.811989	0.700802	0.615821
LADF_C1S3	0.189418	0.111731	0.00182268	0.614969	0.130123	0.262491	0.244126	0.112875	0.138957	0.000487971	0.000119076	0.771297	0.0462573	0.85039	0.909128	0.676311	0.568648	0.122581	0.0932391	0.0123904	0.740585	0.0515195	0.267585	0.161512	0.548221	0.610122	0.153376	0.141331	0.0836328	0.982213	0.676522	0.0207462	0.566538	0.127214	0.109517	0.126419	0.0425999	0.702597	0.0579645	0.389035	0.26047	0.976888	0.402871	1.0635e-62	0.0292569	0.914394	0.515687	0.156726	0.591641
LNDF_C1S3	0.805142	0.702503	0.0495127	0.476849	0.639904	0.737596	0.742803	0.780685	0.357276	0.0238306	0.00923572	0.244686	0.0621185	0.407728	0.844739	0.0979262	0.294905	0.913597	0.607836	0.0990326	0.797152	0.547222	0.749864	0.589682	0.660068	0.497495	0.971796	0.158341	0.320181	0.767672	0.572417	0.188639	0.424303	0.986751	0.914157	0.453315	0.19127	0.508057	0.6257	0.645859	0.0638497	0.859795	0.696391	0.0292569	0	0.924428	0.210796	0.573665	0.436243
LMois_C1S3	0.587283	0.724245	0.779007	0.802603	0.910101	0.886003	0.845601	0.814241	0.0263536	0.603863	0.888568	0.450158	0.649453	0.390332	0.810849	0.644326	0.552009	0.701939	0.82648	0.959393	0.778731	0.820406	0.809113	0.799486	0.808776	0.861142	0.60488	0.70976	0.292276	0.242179	0.362306	0.0873208	0.734359	0.901166	0.699292	0.804644	0.832927	0.985252	0.759122	0.865037	0.100294	0.787837	0.47948	0.914394	0.924428	0	0.832113	0.3243	0.850724
SCP_C1S3	0.627278	0.518454	0.610053	0.682342	0.954618	0.479599	0.486912	0.73105	0.494488	0.629709	0.616641	0.603225	0.00160231	0.0139474	0.940605	0.193251	0.848935	0.719391	0.385615	0.990856	0.670442	0.966579	0.383987	0.787269	0.400529	0.204807	0.634085	0.3142	0.233574	0.670946	0.388151	0.81375	0.66074	0.174557	0.690486	0.576355	0.751913	0.89228	0.817291	0.469879	0.828153	0.321818	0.811989	0.515687	0.210796	0.832113	0	0.932135	0.670395
SCF_C1S3	0.0321296	0.141495	0.182616	0.18093	0.00478679	0.0459539	0.0182047	0.630075	0.539943	0.176057	0.240102	0.444576	0.283718	0.358978	0.805986	0.836978	0.176746	0.0157319	0.0346853	0.183105	0.0528347	0.00148522	0.0145758	0.00206866	0.753578	0.954581	0.280094	0.36923	0.113299	0.821923	0.254701	0.426355	0.916966	0.0475168	0.0283433	0.0664174	0.0387877	0.200626	0.00421385	0.0503373	0.452534	0.969258	0.700802	0.156726	0.573665	0.3243	0.932135	0	0.845556
SADF_C1S3	0.399617	0.351512	0.977961	0.130524	0.343653	0.27295	0.391684	0.963725	0.228972	0.657542	0.570496	0.161671	0.933397	0.419097	0.0310617	0.607198	0.998485	0.604743	0.43073	0.542022	0.158873	0.550481	0.65023	0.639781	0.92144	0.780288	0.53121	0.687356	0.603875	0.145108	0.242589	0.800126	0.467607	0.912431	0.387488	0.320252	0.788541	0.0606483	0.409168	0.271252	0.523355	0.943128	0.615821	0.591641	0.436243	0.850724	0.670395	0.845556	0
SNDF_C1S3	0.625612	0.531212	0.129109	0.813527	0.617595	0.354295	0.553925	0.519056	0.776041	0.429619	0.176805	0.889161	0.370787	0.449507	0.100699	0.0148041	0.626951	0.663231	0.431008	0.329796	0.98107	0.598144	0.590767	0.704127	0.540059	0.0536167	0.704163	0.0255518	0.719631	0.401515	0.856519	0.429146	0.0748757	0.935966	0.775256	0.289298	0.5065	0.99655	0.677643	0.248448	0.00148765	0.210927	0.14282	0.408442	0.0588173	0.53136	0.543879	0.971077	0.213202
SMois_C1S3	0.841003	0.0539939	0.391196	0.220244	0.324952	0.190526	0.16217	0.347568	0.323403	0.237518	0.458872	0.455437	0.360562	0.78131	0.552222	0.618387	0.305271	0.954495	0.0462608	0.55436	0.643905	0.538327	0.404564	0.420058	0.336617	0.470136	0.336209	0.0810501	0.901955	0.637963	0.514982	0.273762	0.476841	0.074686	0.735693	0.0272999	0.594853	0.254644	0.460178	0.181176	0.54382	0.659205	0.745629	0.496788	0.705344	0.476666	0.218072	0.944126	0.418232
[truncated: 2 more columns]
