# Supplementary material
Source: MDPI journal article supplement (https://www.mdpi.com/2071-1050/15/14/11446)
Supplement: s1 [file s1 › Supplementary Table S6.xlsx]

## Sheet: CORR-MAT
Supplementary Table S6 Correlation Matrix for the cutting 1 x spacing 1, 2, and 3 during second growing season (year 2) for all the 17 traits of 10 Quinoa genotypes
Note: This file has 2 sheets; the first sheet is correlation matrix and the second sheet contains p-values (<0.05 and <0.01). In p-values: the red ones are significant at <0.05 and green at <0.01).
	PH_C1S1	NoL_C1S1	LA_C1S1	Br_C1S1	ID_C1S1	FW_C1S1	DW_C1S1	LCP_C1S1	LCF_C1S1	LADF_C1S1	LNDF_C1S1	LMois_C1S1	SCP_C1S1	SCF_C1S1	SADF_C1S1	SNDF_C1S1	SMois_C1S1	PH_C1S2	NoL_C1S2	LA_C1S2	Br_C1S2	ID_C1S2	FW_C1S2	DW_C1S2	LCP_C1S2	LCF_C1S2	LADF_C1S2	LNDF_C1S2	LMois_C1S2	SCP_C1S2	SCF_C1S2	SADF_C1S2	SNDF_C1S2	SMois_C1S2	PH_C1S3	NoL_C1S3	LA_C1S3	Br_C1S3	ID_C1S3	FW_C1S3	DW_C1S3	LCP_C1S3	LCF_C1S3	LADF_C1S3	LNDF_C1S3	LMois_C1S3	SCP_C1S3	SCF_C1S3	SADF_C1S3
PH_C1S1
NoL_C1S1	0.758534
LA_C1S1	0.169311	-0.186713
Br_C1S1	0.903842	0.664814	-0.116016
ID_C1S1	0.45426	0.331171	0.147853	0.5948
FW_C1S1	0.77711	0.550176	-0.0125408	0.878283	0.613887
DW_C1S1	0.437569	0.346538	-0.0638947	0.605906	0.67995	0.793349
LCP_C1S1	0.267104	0.0350244	0.0670274	0.304792	0.19305	-0.106458	-0.127611
LCF_C1S1	0.133911	0.496331	-0.327359	0.0730745	-0.320246	-0.148195	-0.381002	0.236582
LADF_C1S1	-0.204323	0.0688552	-0.0553565	-0.365446	-0.282508	-0.674138	-0.645323	0.266541	0.292976
LNDF_C1S1	-0.340867	-0.3982	0.0241342	-0.404052	-0.473336	-0.703371	-0.571022	0.494449	0.0415404	0.712052
LMois_C1S1	-0.341769	-0.436401	-0.0693553	-0.293497	-0.268669	-0.121912	-0.276531	-0.24925	-0.119384	-0.383289	-0.297782
SCP_C1S1	0.00470106	-0.266392	0.49319	-0.0832552	-0.0146354	-0.129719	-0.154353	0.243475	-0.221288	0.237116	0.51704	-0.240974
SCF_C1S1	0.260885	0.114748	0.277077	0.264824	0.287122	0.314598	0.428876	0.0724894	-0.246116	-0.0424928	0.171793	-0.543664	0.777784
SADF_C1S1	-0.257001	-0.440178	0.164285	-0.284914	-0.286499	-0.309348	0.0532176	0.303292	-0.240281	-0.134343	0.359627	0.0148219	-0.0910457	-0.121638
SNDF_C1S1	0.662602	0.697994	-0.107504	0.630705	0.43344	0.524182	0.170208	-0.00614239	0.138415	0.17166	-0.256446	-0.220222	0.162895	0.299721	-0.810574
SMois_C1S1	0.17262	-0.0381993	0.496781	0.205376	0.747298	0.436993	0.699513	-0.0657587	-0.60944	-0.517086	-0.486673	-0.0965912	-0.0205555	0.244169	0.193539	-0.103938
PH_C1S2	0.812823	0.453152	-0.0730689	0.892372	0.325622	0.734594	0.40659	0.366116	0.0409243	-0.270275	-0.0927879	-0.2701	0.254092	0.453175	-0.237187	0.588751	-0.0387793
NoL_C1S2	0.857191	0.9173	0.0251254	0.697747	0.330562	0.471125	0.242576	0.311274	0.395808	0.216824	-0.131729	-0.520696	-0.0167848	0.230116	-0.303471	0.709802	-0.0375989	0.577475
LA_C1S2	0.377274	-0.0321527	0.645413	0.32666	0.466423	0.442498	0.555236	0.202878	-0.481045	-0.404903	-0.0760462	-0.241069	0.599564	0.750129	0.21905	0.0463152	0.669085	0.397586	0.149547
Br_C1S2	0.370599	-0.0169165	-0.070842	0.48707	-0.0073283	0.354838	0.191874	0.300974	-0.130183	-0.105646	0.343158	-0.347804	0.539799	0.608906	-0.0211233	0.238517	-0.205777	0.795196	0.151104	0.378838
ID_C1S2	0.456899	-0.0176546	0.379982	0.444824	0.319275	0.375248	0.231726	0.297972	-0.437324	-0.0409895	0.238297	-0.255357	0.787225	0.752801	-0.146704	0.448955	0.171612	0.69129	0.249886	0.710382	0.754889
FW_C1S2	0.794547	0.478747	0.0579275	0.881911	0.634747	0.933364	0.750987	0.0884127	-0.250117	-0.565867	-0.505532	-0.107202	0.1113	0.468196	-0.249552	0.587797	0.423596	0.82304	0.510937	0.600516	0.471742	0.613082
DW_C1S2	0.289101	0.30473	-0.287282	0.45716	0.453147	0.472273	0.828528	0.130183	-0.292861	-0.284055	-0.127488	-0.38851	-0.0711304	0.453234	0.286853	0.0880386	0.419258	0.352992	0.291091	0.431921	0.26207	0.229996	0.553007
LCP_C1S2	0.542342	0.399862	0.36584	0.459983	0.414979	0.331783	0.143054	0.553114	0.340477	-0.167305	-0.213057	0.00327091	0.238635	0.223284	-0.112885	0.311148	0.240696	0.388976	0.516698	0.482337	-0.00607671	0.275521	0.45394	0.0567942
LCF_C1S2	0.239311	0.146557	-0.452897	0.3345	-0.234724	0.238809	-0.100883	0.155868	0.341077	-0.334111	-0.241175	0.622089	-0.388437	-0.466293	-0.0311506	0.122164	-0.417451	0.35978	0.0976609	-0.321112	0.0867055	-0.139185	0.251307	-0.0699981	0.230447
LADF_C1S2	-0.470624	-0.00820248	-0.22063	-0.50116	-0.219876	-0.710601	-0.468644	0.184921	0.389984	0.837531	0.604576	-0.411339	0.185765	0.0591835	-0.0854393	-0.0483416	-0.400128	-0.459516	0.00253628	-0.382468	-0.217988	-0.257446	-0.659389	-0.121292	-0.158226	-0.452837
LNDF_C1S2	-0.576316	-0.0990168	-0.224076	-0.551739	-0.0707284	-0.64307	-0.335226	-0.0164112	0.165102	0.722957	0.44851	-0.305588	0.1923	0.11172	-0.196345	-0.00764137	-0.224438	-0.546526	-0.143763	-0.326203	-0.297818	-0.229193	-0.593888	-0.0629157	-0.24838	-0.543024	0.940812
LMois_C1S2	0.15591	0.225868	-0.194648	0.332541	0.241876	0.438925	0.17278	-0.232827	0.300073	-0.294512	-0.404367	-0.0721059	0.127249	0.288115	-0.72162	0.407836	-0.08322	0.34405	0.0271038	-0.00964181	0.290607	0.118951	0.296852	-0.158542	0.146382	0.043131	-0.0804106	-0.00584782
SCP_C1S2	-0.104034	-0.288167	0.0600493	0.00143935	-0.141782	-0.16846	-0.279145	0.429425	0.239832	0.156437	0.519551	-0.279272	0.6346	0.434358	-0.0829884	-0.0663561	-0.321567	0.300003	-0.162996	0.16211	0.636081	0.400545	-0.101942	-0.239118	0.135951	-0.136011	0.269615	0.16056	0.477905
SCF_C1S2	0.279717	0.141572	0.52388	0.206806	0.430033	0.398953	0.438263	-0.168041	-0.32526	-0.18277	-0.162037	-0.334369	0.6925	0.876752	-0.302704	0.370117	0.473995	0.28365	0.197479	0.790042	0.292636	0.656337	0.497715	0.249955	0.333444	-0.514257	-0.100744	0.0343103	0.357226	0.202491
SADF_C1S2	0.125739	-0.0201498	0.0947158	0.147083	-0.0774804	0.116284	-0.0256837	0.0404253	0.00814931	0.132515	0.35469	-0.369234	0.818499	0.800374	-0.35972	0.35172	-0.267464	0.485762	0.0826566	0.364428	0.764145	0.702656	0.233025	-0.00341618	0.0469136	-0.23593	0.146427	0.138995	0.523828	0.73965	0.625793
SNDF_C1S2	0.658367	0.65135	-0.0808134	0.631513	0.300848	0.486803	0.0400993	0.084354	0.330279	0.164348	-0.163049	-0.264606	0.272589	0.344413	-0.828429	0.935196	-0.257836	0.670323	0.6722	0.0350438	0.394505	0.470294	0.522787	-0.0753343	0.373743	0.157	-0.0204632	-0.0470785	0.594264	0.234381	0.366335	0.532851
SMois_C1S2	0.097636	0.0600448	0.205092	-0.0927476	-0.369039	0.0546323	0.0914064	-0.314748	7.10631e-05	-0.277439	-0.198215	-0.0158262	-0.470688	-0.333166	0.530114	-0.468192	0.107113	-0.186303	0.0030064	-0.0512331	-0.205154	-0.405405	-0.13872	-0.0133943	-0.261677	0.0259349	-0.368231	-0.48234	-0.386277	-0.420591	-0.278521	-0.443352	-0.469565
PH_C1S3	0.938269	0.596164	0.179967	0.888403	0.538871	0.80881	0.523225	0.223324	-0.164991	-0.272941	-0.329327	-0.216143	0.10003	0.334642	-0.233263	0.684133	0.285068	0.833226	0.729609	0.490573	0.432831	0.627114	0.897932	0.394991	0.461536	0.23746	-0.574151	-0.597769	0.0686215	-0.176244	0.359306	0.150529	0.606528	-0.025675
NoL_C1S3	0.779419	0.745386	0.113332	0.521688	0.0194863	0.29718	-0.0722946	0.245191	0.374246	0.252844	-0.0627701	-0.183319	-0.0664809	-0.051108	-0.220718	0.614994	-0.234914	0.474921	0.876542	-0.0111067	0.0610636	0.186403	0.356421	-0.0116117	0.434062	0.332543	-0.137024	-0.316061	-0.185047	-0.282705	-0.0280034	-0.0532636	0.574764	0.164824	0.676431
LA_C1S3	0.176591	-0.268355	0.726746	0.0143961	0.09107	0.217407	0.353281	-0.0437558	-0.63398	-0.432796	-0.0535872	0.0293075	0.330569	0.358559	0.54409	-0.301683	0.606731	0.086425	-0.0909774	0.790495	0.143538	0.432206	0.316143	0.240539	0.141834	-0.233692	-0.544564	-0.507807	-0.413171	-0.16833	0.455546	0.0100007	-0.367084	0.434376	0.306137	-0.010395
Br_C1S3	0.625777	0.450746	-0.268593	0.74297	0.46886	0.644512	0.704755	0.280656	-0.232861	-0.32156	-0.234895	-0.201985	-0.277082	0.125666	0.209033	0.287202	0.307174	0.605568	0.505815	0.28676	0.302151	0.274013	0.717633	0.805864	0.168027	0.313063	-0.436998	-0.452201	-0.245776	-0.379763	-0.0299345	-0.203114	0.118883	0.100888	0.723509	0.380733	0.210796
ID_C1S3	0.73697	0.31591	0.470743	0.553312	0.344136	0.459069	0.11774	0.219359	-0.29271	-0.0112012	-0.0887697	-0.0255077	0.317	0.230958	-0.222298	0.618951	0.193207	0.594063	0.561433	0.450908	0.296387	0.694201	0.626689	0.0228988	0.41102	0.137438	-0.467339	-0.48317	-0.152479	-0.167924	0.344097	0.149499	0.528371	-0.0818902	0.849064	0.692385	0.409384	0.406321
FW_C1S3	0.695314	0.228216	0.220172	0.667981	0.324333	0.71291	0.333618	-0.061141	-0.40428	-0.370139	-0.313067	0.0966731	0.203937	0.262681	-0.319079	0.595569	0.177434	0.740398	0.345436	0.404295	0.513773	0.696841	0.789705	0.108491	0.166139	0.28516	-0.733844	-0.677772	0.161432	-0.100238	0.346048	0.276204	0.543211	-0.0418828	0.846836	0.444346	0.363636	0.467948	0.843741
DW_C1S3	0.430663	0.301917	-0.0651258	0.428497	0.290446	0.589151	0.389461	-0.389768	-0.413398	-0.305231	-0.477553	0.29447	-0.00371406	0.15965	-0.426349	0.642073	0.160132	0.402691	0.271018	0.189722	0.120675	0.401472	0.67019	0.266157	0.0236329	0.305556	-0.534811	-0.359022	0.0654153	-0.503998	0.3142	0.0649118	0.434343	-0.142811	0.640486	0.356038	0.186078	0.461124	0.624676	0.774212
LCP_C1S3	-0.557045	-0.183947	-0.217346	-0.417293	0.155962	-0.267308	0.136725	-0.329025	-0.218325	0.233153	0.105761	-0.183229	0.25315	0.39574	-0.225087	0.00722941	0.127834	-0.419046	-0.317502	0.00983307	-0.162314	-0.036396	-0.225595	0.252983	-0.302521	-0.568814	0.579408	0.796563	0.187828	0.0603794	0.381378	0.262074	-0.0923666	-0.501132	-0.452089	-0.580567	-0.224261	-0.270852	-0.46867	-0.427823	-0.0154366
LCF_C1S3	0.109188	-0.0925164	0.401402	-0.14672	-0.302092	-0.1745	-0.0928501	0.199061	-0.17439	-0.0130136	0.190282	0.226645	0.00867728	-0.138598	0.677325	-0.320206	0.0988121	-0.0982651	0.111566	0.271144	-0.168472	0.0367982	-0.0233626	0.107407	0.195555	0.190454	-0.245465	-0.35791	-0.834819	-0.423633	-0.13097	-0.372303	-0.431024	0.499844	0.160366	0.382948	0.645436	0.254751	0.351066	0.0781643	0.089504	-0.443722
LADF_C1S3	-0.289662	0.0471382	-0.280271	-0.323244	-0.279272	-0.662633	-0.463284	0.421688	0.441336	0.8309	0.705403	-0.512571	-0.0200539	-0.133859	0.1788	-0.162694	-0.460866	-0.300021	0.125745	-0.459553	-0.0922208	-0.300881	-0.636949	-0.056549	-0.20102	-0.293197	0.868937	0.692598	-0.29144	0.245659	-0.407869	-0.0317465	-0.113352	-0.101714	-0.438161	0.037355	-0.501983	-0.183724	-0.391483	-0.670433	-0.659799	0.202075	-0.0729546
LNDF_C1S3	-0.390178	-0.169652	-0.081772	-0.479552	-0.44264	-0.758558	-0.581194	0.531427	0.487583	0.537125	0.580137	0.00543546	-0.111604	-0.400989	0.502918	-0.494578	-0.37644	-0.460686	-0.0667709	-0.360611	-0.354953	-0.467726	-0.689898	-0.201639	0.118193	0.0655683	0.599519	0.393326	-0.523284	0.104285	-0.562392	-0.350056	-0.435687	0.0685418	-0.531001	0.0306283	-0.237607	-0.244107	-0.389226	-0.742357	-0.705976	-0.0855015	0.373578	0.7407
LMois_C1S3	0.35811	0.283936	-0.19744	0.432901	0.193099	0.37142	0.263707	0.0521746	-0.131061	0.0825016	0.125953	-0.218277	0.562209	0.708838	-0.44175	0.690055	-0.167502	0.638678	0.367213	0.330287	0.638061	0.733585	0.577432	0.403976	0.13535	0.0618983	0.00741937	0.0743865	0.296458	0.230845	0.545702	0.720274	0.655326	-0.585206	0.505309	0.23265	-0.0439279	0.328552	0.419077	0.514295	0.589417	0.294212	-0.190907	-0.164021	-0.459141
SCP_C1S3	0.217574	-0.0953725	0.519076	0.074154	-0.0807428	-0.0151451	-0.0551871	0.245081	-0.155017	0.240127	0.545618	-0.590001	0.822402	0.741247	0.0815681	0.0763196	-0.0241384	0.374615	0.162624	0.565136	0.679772	0.718558	0.113479	-0.00240804	0.0667483	-0.498352	0.10977	0.00963366	0.0592931	0.62765	0.572287	0.770296	0.232728	-0.0473613	0.209177	0.0833867	0.411094	-0.129275	0.315599	0.235322	-0.175833	-0.0141068	0.0445344	0.124033	-0.126159	0.377832
SCF_C1S3	-0.159651	-0.0375071	0.250795	-0.310785	-0.272971	-0.239609	-0.251226	-0.0967701	0.155387	0.212502	0.227497	0.0813947	0.689401	0.529947	-0.220398	0.16987	-0.222998	-0.0715852	0.0157604	0.289412	0.0530998	0.298861	-0.0619891	-0.135908	0.312578	-0.12912	0.309097	0.336812	0.144374	0.265766	0.56912	0.562445	0.22685	-0.371172	-0.138033	0.0328794	0.101168	-0.431869	0.045286	-0.0905491	0.105216	0.396638	0.112382	-0.0626306	0.0599426	0.474813	0.346038
SADF_C1S3	-0.213524	-0.0719308	0.0724604	-0.385048	-0.406532	-0.471361	-0.256123	-0.0531561	-0.11098	0.671888	0.711313	-0.490498	0.508376	0.45025	0.141689	0.00668545	-0.319679	-0.144537	0.0787333	0.0484204	0.229287	0.25929	-0.327206	0.113681	-0.384027	-0.519985	0.579857	0.531859	-0.357623	0.137415	0.231097	0.444949	-0.0271711	-0.0193703	-0.179139	0.0686583	0.101374	-0.155578	-0.00451383	-0.179914	-0.0837844	0.401477	0.194061	0.514617	0.192398	0.363327	0.585357	0.440678
SNDF_C1S3	0.73386	0.724854	-0.0159375	0.694001	0.557206	0.597993	0.223209	0.0416902	0.130801	0.0621191	-0.401321	-0.150609	0.0406883	0.177464	-0.774241	0.966757	0.0465642	0.56848	0.73228	0.0789757	0.112227	0.379005	0.635227	0.0607848	0.43085	0.166731	-0.167329	-0.126128	0.377426	-0.163893	0.323161	0.172613	0.887677	-0.398442	0.741724	0.648346	-0.245491	0.332982	0.670693	0.616847	0.628965	-0.11829	-0.267288	-0.245359	-0.483677	0.53125	-0.0362738	0.0436936	-0.193553
SMois_C1S3	0.194355	0.402684	-0.166717	0.247605	0.0661701	0.263443	0.117567	0.107906	0.713871	-0.378625	-0.487124	0.162933	-0.313013	-0.157655	-0.150743	0.00676941	-0.0429	0.0899056	0.210016	-0.0736691	-0.231203	-0.403104	0.129943	-0.0502895	0.602415	0.426512	-0.0947579	-0.183795	0.462632	0.0830531	-0.0666459	-0.151762	0.154346	0.0355304	-0.0251368	0.104277	-0.285746	-0.0550606	-0.293623	-0.252167	-0.223108	-0.200572	-0.156371	-0.136996	0.168856	-0.211656	-0.374728	0.109152	-0.608228
[truncated: 2 more columns]

## Sheet: P_VALUE
	PH_C1S1	NoL_C1S1	LA_C1S1	Br_C1S1	ID_C1S1	FW_C1S1	DW_C1S1	LCP_C1S1	LCF_C1S1	LADF_C1S1	LNDF_C1S1	LMois_C1S1	SCP_C1S1	SCF_C1S1	SADF_C1S1	SNDF_C1S1	SMois_C1S1	PH_C1S2	NoL_C1S2	LA_C1S2	Br_C1S2	ID_C1S2	FW_C1S2	DW_C1S2	LCP_C1S2	LCF_C1S2	LADF_C1S2	LNDF_C1S2	LMois_C1S2	SCP_C1S2	SCF_C1S2	SADF_C1S2	SNDF_C1S2	SMois_C1S2	PH_C1S3	NoL_C1S3	LA_C1S3	Br_C1S3	ID_C1S3	FW_C1S3	DW_C1S3	LCP_C1S3	LCF_C1S3	LADF_C1S3	LNDF_C1S3	LMois_C1S3	SCP_C1S3	SCF_C1S3	SADF_C1S3
PH_C1S1	0	0.0109821	0.640068	0.000332587	0.187217	0.0081695	0.205992	0.455641	0.712267	0.57124	0.335118	0.333757	0.989717	0.466595	0.473493	0.0368122	0.633445	0.00425552	0.00152604	0.282489	0.291782	0.184345	0.00603309	0.41785	0.105309	0.505472	0.169825	0.0811885	0.667118	0.774872	0.433788	0.729253	0.038472	0.788446	5.89445e-05	0.00785986	0.62553	0.0529582	0.0150284	0.0255926	0.214067	0.0943791	0.763979	0.416906	0.264985	0.309602	0.545954	0.659529	0.553636
NoL_C1S1	0.0109821	0	0.605509	0.0359649	0.349924	0.0993911	0.32661	0.923478	0.144524	0.850091	0.254411	0.207346	0.456889	0.752268	0.202988	0.0247932	0.916561	0.188431	0.000185024	0.929739	0.963006	0.961392	0.161564	0.39193	0.25225	0.686204	0.982058	0.785512	0.530359	0.419424	0.696444	0.95594	0.0413322	0.869124	0.0689115	0.0133433	0.453452	0.191082	0.373881	0.525976	0.396538	0.610958	0.799344	0.897114	0.639384	0.426588	0.79326	0.918069	0.843463
LA_C1S1	0.640068	0.605509	1.0635e-62	0.749602	0.68355	0.972571	0.860799	0.854035	0.355834	0.879278	0.947237	0.849013	0.147483	0.438322	0.65017	0.767533	0.144103	0.841012	0.945073	0.0438613	0.845809	0.278766	0.873708	0.420918	0.298506	0.18871	0.540187	0.533713	0.589977	0.869115	0.120122	0.794658	0.824371	0.56976	0.618828	0.755246	0.0172687	0.453036	0.169701	0.541049	0.85814	0.546387	0.250258	0.43284	0.822315	0.584546	0.124178	0.48461	0.842323
Br_C1S1	0.000332587	0.0359649	0.749602	6.6469e-64	0.0697139	0.000826971	0.0633572	0.39183	0.841	0.299066	0.246849	0.41048	0.819136	0.459645	0.424928	0.0505671	0.569215	0.000514577	0.0248663	0.356923	0.153355	0.197703	0.000736046	0.184061	0.18102	0.344803	0.140045	0.0982364	0.347811	0.996851	0.566468	0.685126	0.0501821	0.798851	0.00059185	0.121962	0.968515	0.0138128	0.0970823	0.0347745	0.216636	0.230207	0.685869	0.36227	0.160758	0.211431	0.838677	0.382104	0.27187
ID_C1S1	0.187217	0.349924	0.68355	0.0697139	0	0.0590324	0.0305175	0.593092	0.366995	0.429019	0.167039	0.452904	0.967992	0.421187	0.422242	0.210798	0.0129798	0.358543	0.350865	0.174194	0.98397	0.368531	0.0486605	0.188436	0.233068	0.513908	0.541607	0.846053	0.500779	0.696012	0.214812	0.831525	0.398294	0.293977	0.108001	0.95739	0.802428	0.171651	0.330199	0.360561	0.415589	0.667011	0.39625	0.43455	0.200177	0.592997	0.824522	0.445416	0.243682
FW_C1S1	0.0081695	0.0993911	0.972571	0.000826971	0.0590324	0	0.00616545	0.769744	0.68285	0.0325374	0.0232418	0.737245	0.720967	0.375978	0.384425	0.11987	0.206659	0.01553	0.169308	0.200338	0.314363	0.285292	7.95512e-05	0.168128	0.34898	0.506391	0.0212625	0.044887	0.204427	0.641774	0.253432	0.749041	0.153615	0.880848	0.0046085	0.404353	0.54627	0.0442539	0.182002	0.0206558	0.0731004	0.455285	0.629693	0.0368001	0.0109781	0.29063	0.966878	0.504925	0.169065
DW_C1S1	0.205992	0.32661	0.860799	0.0633572	0.0305175	0.00616545	0	0.725352	0.27737	0.0439002	0.0846855	0.439262	0.670282	0.216185	0.883916	0.638271	0.0243479	0.243608	0.499503	0.095683	0.595389	0.519453	0.012298	0.00305824	0.693395	0.78155	0.171876	0.343692	0.633126	0.434769	0.20519	0.943854	0.912424	0.801711	0.12067	0.842679	0.316641	0.0228533	0.745984	0.346156	0.265941	0.706443	0.798633	0.177502	0.0780499	0.46161	0.879645	0.483834	0.47506
LCP_C1S1	0.455641	0.923478	0.854035	0.39183	0.593092	0.769744	0.725352	0	0.510483	0.456628	0.146293	0.487395	0.497864	0.84226	0.394283	0.986564	0.856773	0.298113	0.381315	0.574025	0.398087	0.403041	0.808102	0.720003	0.0972277	0.667202	0.609037	0.96411	0.517413	0.215532	0.642615	0.911714	0.816783	0.375739	0.535123	0.494744	0.904467	0.432181	0.542583	0.866753	0.265532	0.353245	0.581402	0.224827	0.113919	0.886178	0.494944	0.790287	0.884049
LCF_C1S1	0.712267	0.144524	0.355834	0.841	0.366995	0.68285	0.27737	0.510483	0	0.41135	0.909287	0.742537	0.538949	0.493065	0.503694	0.702953	0.0614173	0.910628	0.257539	0.159272	0.720003	0.206276	0.485831	0.411543	0.335707	0.334801	0.265244	0.648524	0.399571	0.504517	0.35911	0.982175	0.351302	0.999845	0.648747	0.286684	0.0490187	0.517351	0.411794	0.246557	0.235034	0.544535	0.629913	0.201663	0.152858	0.718179	0.668933	0.66818	0.7602
LADF_C1S1	0.57124	0.850091	0.879278	0.299066	0.429019	0.0325374	0.0439002	0.456628	0.41135	0	0.0208798	0.274254	0.509501	0.907215	0.711372	0.635364	0.125882	0.450102	0.547373	0.245759	0.771462	0.910486	0.0881825	0.426386	0.644094	0.3454	0.00249328	0.0181547	0.408787	0.666046	0.613281	0.71516	0.650042	0.437698	0.445467	0.480928	0.211554	0.36492	0.9755	0.292428	0.391113	0.51681	0.971538	0.0029013	0.109372	0.820751	0.503977	0.55558	0.0333434
LNDF_C1S1	0.335118	0.254411	0.947237	0.246849	0.167039	0.0232418	0.0846855	0.146293	0.909287	0.0208798	0	0.403356	0.125922	0.635098	0.307407	0.474484	0.153741	0.798765	0.71679	0.834608	0.331667	0.507331	0.136065	0.725608	0.554523	0.50206	0.0640978	0.193566	0.246445	0.123773	0.654705	0.314579	0.652662	0.583043	0.352777	0.86323	0.883114	0.513593	0.807339	0.378432	0.162762	0.771219	0.598504	0.0226731	0.0787233	0.728808	0.102809	0.527315	0.0210741
LMois_C1S1	0.333757	0.207346	0.849013	0.41048	0.452904	0.737245	0.439262	0.487395	0.742537	0.274254	0.403356	0	0.502427	0.104296	0.967584	0.540956	0.790667	0.450407	0.1228	0.502254	0.324726	0.476428	0.768173	0.267214	0.992845	0.0547958	0.237609	0.390531	0.843086	0.43455	0.345004	0.293703	0.460027	0.965389	0.548663	0.612196	0.935945	0.575747	0.944238	0.790493	0.408858	0.612374	0.528906	0.129803	0.98811	0.544626	0.072584	0.823124	0.150049
SCP_C1S1	0.989717	0.456889	0.147483	0.819136	0.967992	0.720967	0.670282	0.497864	0.538949	0.509501	0.125922	0.502427	0	0.0080782	0.80248	0.652974	0.955054	0.47869	0.963294	0.0669382	0.107278	0.0068745	0.759524	0.845187	0.506711	0.267311	0.607375	0.594558	0.726107	0.0487291	0.0264506	0.00378995	0.446079	0.169758	0.78336	0.855214	0.350854	0.438313	0.372145	0.571983	0.991876	0.480379	0.98102	0.95615	0.758884	0.0907194	0.00349172	0.0274181	0.133512
SCF_C1S1	0.466595	0.752268	0.438322	0.459645	0.421187	0.375978	0.216185	0.84226	0.493065	0.907215	0.635098	0.104296	0.0080782	0	0.73782	0.400152	0.4966	0.188406	0.52244	0.0124543	0.061708	0.0119721	0.172341	0.188341	0.535198	0.17433	0.870989	0.758639	0.419511	0.209724	0.000867722	0.0054179	0.329784	0.346851	0.344586	0.888493	0.308951	0.729406	0.520876	0.46342	0.659531	0.257628	0.702573	0.712375	0.250792	0.021734	0.0141545	0.115119	0.191632
SADF_C1S1	0.473493	0.202988	0.65017	0.424928	0.422242	0.384425	0.883916	0.394283	0.503694	0.711372	0.307407	0.967584	0.80248	0.73782	0	0.00445085	0.592139	0.50937	0.393989	0.543165	0.953813	0.685903	0.48685	0.421643	0.756187	0.931924	0.81446	0.586673	0.0184747	0.819708	0.395246	0.307273	0.0030649	0.114983	0.516607	0.540022	0.10397	0.562203	0.537049	0.368842	0.219202	0.531819	0.0314189	0.621141	0.138436	0.201191	0.822752	0.540625	0.696202
SNDF_C1S1	0.0368122	0.0247932	0.767533	0.0505671	0.210798	0.11987	0.638271	0.986564	0.702953	0.635364	0.474484	0.540956	0.652974	0.400152	0.00445085	0	0.775077	0.0733445	0.0214753	0.898902	0.506928	0.193071	0.0739278	0.808901	0.381519	0.736719	0.8945	0.983285	0.242026	0.855484	0.29246	0.318934	7.13183e-05	0.172346	0.0291178	0.0584488	0.396921	0.421054	0.0563922	0.0692606	0.0453285	0.984186	0.367058	0.653379	0.146172	0.027212	0.83402	0.638948	0.985376
SMois_C1S1	0.633445	0.916561	0.144103	0.569215	0.0129798	0.206659	0.0243479	0.856773	0.0614173	0.125882	0.153741	0.790667	0.955054	0.4966	0.592139	0.775077	0	0.915298	0.917869	0.0343661	0.568445	0.635461	0.222514	0.227793	0.502935	0.230012	0.251906	0.533034	0.819212	0.364909	0.166367	0.455011	0.472007	0.768361	0.424665	0.513558	0.0629009	0.38795	0.592785	0.623854	0.658556	0.724889	0.785947	0.180075	0.283641	0.643698	0.947228	0.535734	0.367892
PH_C1S2	0.00425552	0.188431	0.841012	0.000514577	0.358543	0.01553	0.243608	0.298113	0.910628	0.450102	0.798765	0.450407	0.47869	0.188406	0.50937	0.0733445	0.915298	0	0.0804355	0.255212	0.00596223	0.0268255	0.00344463	0.317065	0.26659	0.307187	0.181521	0.102122	0.330329	0.399686	0.427074	0.154628	0.0339116	0.606315	0.00275312	0.165424	0.812351	0.0635449	0.0701495	0.0143251	0.248596	0.228052	0.787109	0.399657	0.180267	0.0468532	0.286171	0.844207	0.690349
NoL_C1S2	0.00152604	0.000185024	0.945073	0.0248663	0.350865	0.169308	0.499503	0.381315	0.257539	0.547373	0.71679	0.1228	0.963294	0.52244	0.393989	0.0214753	0.917869	0.0804355	0	0.680084	0.676904	0.486248	0.131241	0.414506	0.126216	0.788393	0.994452	0.691937	0.940754	0.652768	0.584471	0.820419	0.0332308	0.993424	0.0166194	0.000873415	0.802626	0.135809	0.0912638	0.328254	0.448808	0.371345	0.758964	0.729241	0.854588	0.296558	0.653519	0.965533	0.828835
LA_C1S2	0.282489	0.929739	0.0438613	0.356923	0.174194	0.200338	0.095683	0.574025	0.159272	0.245759	0.834608	0.502254	0.0669382	0.0124543	0.543165	0.898902	0.0343661	0.255212	0.680084	0	0.280335	0.0213206	0.0663923	0.212582	0.157992	0.365627	0.27537	0.357636	0.97891	0.654558	0.00654154	0.300517	0.923436	0.888221	0.149978	0.975707	0.00648902	0.4218	0.190904	0.246538	0.599603	0.978492	0.448589	0.181481	0.305987	0.351289	0.0886859	0.417327	0.894328
Br_C1S2	0.291782	0.963006	0.845809	0.153355	0.98397	0.314363	0.595389	0.398087	0.720003	0.771462	0.331667	0.324726	0.107278	0.061708	0.953813	0.506928	0.568445	0.00596223	0.676904	0.280335	0	0.0116046	0.168673	0.464499	0.986708	0.811751	0.545172	0.403296	0.415319	0.0480421	0.411918	0.0100703	0.259252	0.569641	0.211512	0.86692	0.6924	0.396153	0.405668	0.128752	0.739834	0.654145	0.641751	0.799974	0.314194	0.0471336	0.0305781	0.884171	0.523983
ID_C1S2	0.184345	0.961392	0.278766	0.197703	0.368531	0.285292	0.519453	0.403041	0.206276	0.910486	0.507331	0.476428	0.0068745	0.0119721	0.685903	0.193071	0.635461	0.0268255	0.486248	0.0213206	0.0116046	0	0.0594595	0.522663	0.441004	0.701364	0.472701	0.524157	0.743445	0.251366	0.0392854	0.0234439	0.170166	0.245119	0.0523024	0.606119	0.212247	0.44361	0.0259296	0.0251351	0.250168	0.920489	0.919613	0.398241	0.172831	0.0157463	0.0192225	0.401572	0.469422
FW_C1S2	0.00603309	0.161564	0.873708	0.000736046	0.0486605	7.95512e-05	0.012298	0.808102	0.485831	0.0881825	0.136065	0.768173	0.759524	0.172341	0.48685	0.0739278	0.222514	0.00344463	0.131241	0.0663923	0.168673	0.0594595	0	0.0973059	0.187567	0.483689	0.0380669	0.0702533	0.404897	0.779306	0.143231	0.517047	0.121037	0.702322	0.000419114	0.312054	0.37351	0.0194522	0.0525102	0.00658073	0.0339602	0.530869	0.948922	0.0476423	0.0272614	0.0804631	0.754936	0.864919	0.356073
DW_C1S2	0.41785	0.39193	0.420918	0.184061	0.188436	0.168128	0.00305824	0.720003	0.411543	0.426386	0.725608	0.267214	0.845187	0.188341	0.421643	0.808901	0.227793	0.317065	0.414506	0.212582	0.464499	0.522663	0.0973059	0	0.876163	0.847627	0.738542	0.862915	0.661777	0.505826	0.486123	0.992527	0.836138	0.970705	0.258612	0.974603	0.503223	0.00488056	0.949935	0.765449	0.457301	0.480678	0.767739	0.876694	0.576415	0.246946	0.994732	0.708132	0.754511
LCP_C1S2	0.105309	0.25225	0.298506	0.18102	0.233068	0.34898	0.693395	0.0972277	0.335707	0.644094	0.554523	0.992845	0.506711	0.535198	0.756187	0.381519	0.502935	0.26659	0.126216	0.157992	0.986708	0.441004	0.187567	0.876163	0	0.521826	0.662417	0.488966	0.686563	0.708043	0.346424	0.897602	0.287385	0.465195	0.179359	0.21007	0.695906	0.642644	0.238009	0.646438	0.948332	0.395546	0.58821	0.577611	0.745033	0.709286	0.854637	0.379218	0.273253
LCF_C1S2	0.505472	0.686204	0.18871	0.344803	0.513908	0.506391	0.78155	0.667202	0.334801	0.3454	0.50206	0.0547958	0.267311	0.17433	0.931924	0.736719	0.230012	0.307187	0.788393	0.365627	0.811751	0.701364	0.483689	0.847627	0.521826	0	0.188777	0.104785	0.905826	0.707919	0.12833	0.511684	0.664902	0.943306	0.508869	0.347808	0.515814	0.378438	0.704968	0.42451	0.390583	0.0861721	0.598167	0.41098	0.857184	0.865115	0.142639	0.722212	0.123404
LADF_C1S2	0.169825	0.982058	0.540187	0.140045	0.541607	0.0212625	0.171876	0.609037	0.265244	0.00249328	0.0640978	0.237609	0.607375	0.870989	0.81446	0.8945	0.251906	0.181521	0.994452	0.27537	0.545172	0.472701	0.0380669	0.738542	0.662417	0.188777	0	4.9972e-05	0.825235	0.451253	0.781845	0.68647	0.955256	0.295118	0.082607	0.705825	0.103609	0.206652	0.173236	0.0156905	0.111204	0.0791896	0.494246	0.00109878	0.0669639	0.983771	0.76275	0.384831	0.0789022
LNDF_C1S2	0.0811885	0.785512	0.533713	0.0982364	0.846053	0.044887	0.343692	0.96411	0.648524	0.0181547	0.193566	0.390531	0.594558	0.758639	0.586673	0.983285	0.533034	0.102122	0.691937	0.357636	0.403296	0.524157	0.0702533	0.862915	0.488966	0.104785	4.9972e-05	0	0.987208	0.65769	0.925034	0.701754	0.897244	0.157989	0.0679754	0.373641	0.134021	0.189477	0.157169	0.0312641	0.308281	0.00581487	0.309891	0.0264203	0.260807	0.838177	0.978928	0.34127	0.11357
LMois_C1S2	0.667118	0.530359	0.589977	0.347811	0.500779	0.204427	0.633126	0.517413	0.399571	0.408787	0.246445	0.843086	0.726107	0.419511	0.0184747	0.242026	0.819212	0.330329	0.940754	0.97891	0.415319	0.743445	0.404897	0.661777	0.686563	0.905826	0.825235	0.987208	0	0.162409	0.310884	0.120165	0.0700307	0.270212	0.850595	0.608787	0.235318	0.493681	0.674099	0.655927	0.857515	0.603317	0.0026548	0.413921	0.120621	0.40555	0.870751	0.690682	0.310307
SCP_C1S2	0.774872	0.419424	0.869115	0.996851	0.696012	0.641774	0.434769	0.215532	0.504517	0.666046	0.123773	0.43455	0.0487291	0.209724	0.819708	0.855484	0.364909	0.399686	0.652768	0.654558	0.0480421	0.251366	0.779306	0.505826	0.708043	0.707919	0.451253	0.65769	0.162409	6.6469e-64	0.57477	0.0144767	0.51454	0.226163	0.626221	0.428683	0.642035	0.279066	0.642851	0.78292	0.137453	0.8684	0.222469	0.493894	0.774341	0.521086	0.052041	0.457989	0.705016
SCF_C1S2	0.433788	0.696444	0.120122	0.566468	0.214812	0.253432	0.20519	0.642615	0.35911	0.613281	0.654705	0.345004	0.0264506	0.000867722	0.395246	0.29246	0.166367	0.427074	0.584471	0.00654154	0.411918	0.0392854	0.143231	0.486123	0.346424	0.12833	0.781845	0.925034	0.310884	0.57477	0	0.0529505	0.297803	0.435839	0.307871	0.938791	0.185814	0.934577	0.330258	0.327341	0.376616	0.276856	0.718367	0.241984	0.0905913	0.102745	0.0838411	0.0859654	0.52062
SADF_C1S2	0.729253	0.95594	0.794658	0.685126	0.831525	0.749041	0.943854	0.911714	0.982175	0.71516	0.314579	0.293703	0.00378995	0.0054179	0.307273	0.318934	0.455011	0.154628	0.820419	0.300517	0.0100703	0.0234439	0.517047	0.992527	0.897602	0.511684	0.68647	0.701754	0.120165	0.0144767	0.0529505	0	0.112772	0.199368	0.678078	0.883816	0.978126	0.57357	0.680183	0.439825	0.858602	0.464492	0.289394	0.930625	0.321388	0.0188009	0.00913359	0.0905544	0.197561
SNDF_C1S2	0.038472	0.0413322	0.824371	0.0501821	0.398294	0.153615	0.912424	0.816783	0.351302	0.650042	0.652662	0.460027	0.446079	0.329784	0.0030649	7.13183e-05	0.472007	0.0339116	0.0332308	0.923436	0.259252	0.170166	0.121037	0.836138	0.287385	0.664902	0.955256	0.897244	0.0700307	0.51454	0.297803	0.112772	0	0.170919	0.0630129	0.0822036	0.29674	0.743587	0.116406	0.104643	0.209742	0.799663	0.21364	0.755203	0.208175	0.0396948	0.517596	0.528524	0.940607
SMois_C1S2	0.788446	0.869124	0.56976	0.798851	0.293977	0.880848	0.801711	0.375739	0.999845	0.437698	0.583043	0.965389	0.169758	0.346851	0.114983	0.172346	0.768361	0.606315	0.993424	0.888221	0.569641	0.245119	0.702322	0.970705	0.465195	0.943306	0.295118	0.157989	0.270212	0.226163	0.435839	0.199368	0.170919	0	0.943873	0.649083	0.209703	0.78154	0.822062	0.908542	0.693894	0.140071	0.141257	0.779789	0.850767	0.075528	0.896629	0.290978	0.957643
PH_C1S3	5.89445e-05	0.0689115	0.618828	0.00059185	0.108001	0.0046085	0.12067	0.535123	0.648747	0.445467	0.352777	0.548663	0.78336	0.344586	0.516607	0.0291178	0.424665	0.00275312	0.0166194	0.149978	0.211512	0.0523024	0.000419114	0.258612	0.179359	0.508869	0.082607	0.0679754	0.850595	0.626221	0.307871	0.678078	0.0630129	0.943873	0	0.0317301	0.389637	0.0180237	0.00188469	0.00199282	0.046037	0.1896	0.658083	0.205308	0.114264	0.136266	0.561927	0.70374	0.620468
NoL_C1S3	0.00785986	0.0133433	0.755246	0.121962	0.95739	0.404353	0.842679	0.494744	0.286684	0.480928	0.86323	0.612196	0.855214	0.888493	0.540022	0.0584488	0.513558	0.165424	0.000873415	0.975707	0.86692	0.606119	0.312054	0.974603	0.21007	0.347808	0.705825	0.373641	0.608787	0.428683	0.938791	0.883816	0.0822036	0.649083	0.0317301	0	0.977263	0.277737	0.0264859	0.198243	0.312612	0.0784488	0.274717	0.9184	0.933063	0.517741	0.818855	0.928154	0.850516
LA_C1S3	0.62553	0.453452	0.0172687	0.968515	0.802428	0.54627	0.316641	0.904467	0.0490187	0.211554	0.883114	0.935945	0.350854	0.308951	0.10397	0.396921	0.0629009	0.812351	0.802626	0.00648902	0.6924	0.212247	0.37351	0.503223	0.695906	0.515814	0.103609	0.134021	0.235318	0.642035	0.185814	0.978126	0.29674	0.209703	0.389637	0.977263	0	0.558833	0.240068	0.301647	0.606758	0.533366	0.0438512	0.139291	0.508599	0.904093	0.237917	0.780946	0.780509
Br_C1S3	0.0529582	0.191082	0.453036	0.0138128	0.171651	0.0442539	0.0228533	0.432181	0.517351	0.36492	0.513593	0.575747	0.438313	0.729406	0.562203	0.421054	0.38795	0.0635449	0.135809	0.4218	0.396153	0.44361	0.0194522	0.00488056	0.642644	0.378438	0.206652	0.189477	0.493681	0.279066	0.934577	0.57357	0.743587	0.78154	0.0180237	0.277737	0.558833	0	0.243951	0.1726	0.179799	0.449096	0.477511	0.611397	0.496713	0.353979	0.72189	0.212644	0.667791
ID_C1S3	0.0150284	0.373881	0.169701	0.0970823	0.330199	0.182002	0.745984	0.542583	0.411794	0.9755	0.807339	0.944238	0.372145	0.520876	0.537049	0.0563922	0.592785	0.0701495	0.0912638	0.190904	0.405668	0.0259296	0.0525102	0.949935	0.238009	0.704968	0.173236	0.157169	0.674099	0.642851	0.330258	0.680183	0.116406	0.822062	0.00188469	0.0264859	0.240068	0.243951	0	0.00215037	0.0535025	0.171849	0.319898	0.263249	0.266256	0.228014	0.374378	0.90114	0.990126
FW_C1S3	0.0255926	0.525976	0.541049	0.0347745	0.360561	0.0206558	0.346156	0.866753	0.246557	0.292428	0.378432	0.790493	0.571983	0.46342	0.368842	0.0692606	0.623854	0.0143251	0.328254	0.246538	0.128752	0.0251351	0.00658073	0.765449	0.646438	0.42451	0.0156905	0.0312641	0.655927	0.78292	0.327341	0.439825	0.104643	0.908542	0.00199282	0.198243	0.301647	0.1726	0.00215037	6.6469e-64	0.00857022	0.217438	0.830056	0.0338717	0.0139337	0.128297	0.512805	0.80354	0.618933
DW_C1S3	0.214067	0.396538	0.85814	0.216636	0.415589	0.0731004	0.265941	0.265532	0.235034	0.391113	0.162762	0.408858	0.991876	0.659531	0.219202	0.0453285	0.658556	0.248596	0.448808	0.599603	0.739834	0.250168	0.0339602	0.457301	0.948332	0.390583	0.111204	0.308281	0.857515	0.137453	0.376616	0.858602	0.209742	0.693894	0.046037	0.312612	0.606758	0.179799	0.0535025	0.00857022	0	0.966241	0.805771	0.0379054	0.0225146	0.0729388	0.627039	0.772371	0.818003
LCP_C1S3	0.0943791	0.610958	0.546387	0.230207	0.667011	0.455285	0.706443	0.353245	0.544535	0.51681	0.771219	0.612374	0.480379	0.257628	0.531819	0.984186	0.724889	0.228052	0.371345	0.978492	0.654145	0.920489	0.530869	0.480678	0.395546	0.0861721	0.0791896	0.00581487	0.603317	0.8684	0.276856	0.464492	0.799663	0.140071	0.1896	0.0784488	0.533366	0.449096	0.171849	0.217438	0.966241	1.0635e-62	0.198949	0.575573	0.814327	0.409287	0.969148	0.256452	0.250161
LCF_C1S3	0.763979	0.799344	0.250258	0.685869	0.39625	0.629693	0.798633	0.581402	0.629913	0.971538	0.598504	0.528906	0.98102	0.702573	0.0314189	0.367058	0.785947	0.787109	0.758964	0.448589	0.641751	0.919613	0.948922	0.767739	0.58821	0.598167	0.494246	0.309891	0.0026548	0.222469	0.718367	0.289394	0.21364	0.141257	0.658083	0.274717	0.0438512	0.477511	0.319898	0.830056	0.805771	0.198949	0	0.841258	0.287614	0.597282	0.902774	0.757246	0.591121
LADF_C1S3	0.416906	0.897114	0.43284	0.36227	0.43455	0.0368001	0.177502	0.224827	0.201663	0.0029013	0.0226731	0.129803	0.95615	0.712375	0.621141	0.653379	0.180075	0.399657	0.729241	0.181481	0.799974	0.398241	0.0476423	0.876694	0.577611	0.41098	0.00109878	0.0264203	0.413921	0.493894	0.241984	0.930625	0.755203	0.779789	0.205308	0.9184	0.139291	0.611397	0.263249	0.0338717	0.0379054	0.575573	0.841258	6.6469e-64	0.0142643	0.650703	0.732813	0.863532	0.128017
LNDF_C1S3	0.264985	0.639384	0.822315	0.160758	0.200177	0.0109781	0.0780499	0.113919	0.152858	0.109372	0.0787233	0.98811	0.758884	0.250792	0.138436	0.146172	0.283641	0.180267	0.854588	0.305987	0.314194	0.172831	0.0272614	0.576415	0.745033	0.857184	0.0669639	0.260807	0.120621	0.774341	0.0905913	0.321388	0.208175	0.850767	0.114264	0.933063	0.508599	0.496713	0.266256	0.0139337	0.0225146	0.814327	0.287614	0.0142643	0	0.181924	0.728379	0.869346	0.594366
LMois_C1S3	0.309602	0.426588	0.584546	0.211431	0.592997	0.29063	0.46161	0.886178	0.718179	0.820751	0.728808	0.544626	0.0907194	0.021734	0.201191	0.027212	0.643698	0.0468532	0.296558	0.351289	0.0471336	0.0157463	0.0804631	0.246946	0.709286	0.865115	0.983771	0.838177	0.40555	0.521086	0.102745	0.0188009	0.0396948	0.075528	0.136266	0.517741	0.904093	0.353979	0.228014	0.128297	0.0729388	0.409287	0.597282	0.650703	0.181924	6.6469e-64	0.281719	0.165534	0.30209
SCP_C1S3	0.545954	0.79326	0.124178	0.838677	0.824522	0.966878	0.879645	0.494944	0.668933	0.503977	0.102809	0.072584	0.00349172	0.0141545	0.822752	0.83402	0.947228	0.286171	0.653519	0.0886859	0.0305781	0.0192225	0.754936	0.994732	0.854637	0.142639	0.76275	0.978928	0.870751	0.052041	0.0838411	0.00913359	0.517596	0.896629	0.561927	0.818855	0.237917	0.72189	0.374378	0.512805	0.627039	0.969148	0.902774	0.732813	0.728379	0.281719	0	0.327356	0.0754343
SCF_C1S3	0.659529	0.918069	0.48461	0.382104	0.445416	0.504925	0.483834	0.790287	0.66818	0.55558	0.527315	0.823124	0.0274181	0.115119	0.540625	0.638948	0.535734	0.844207	0.965533	0.417327	0.884171	0.401572	0.864919	0.708132	0.379218	0.722212	0.384831	0.34127	0.690682	0.457989	0.0859654	0.0905544	0.528524	0.290978	0.70374	0.928154	0.780946	0.212644	0.90114	0.80354	0.772371	0.256452	0.757246	0.863532	0.869346	0.165534	0.327356	0	0.202416
SADF_C1S3	0.553636	0.843463	0.842323	0.27187	0.243682	0.169065	0.47506	0.884049	0.7602	0.0333434	0.0210741	0.150049	0.133512	0.191632	0.696202	0.985376	0.367892	0.690349	0.828835	0.894328	0.523983	0.469422	0.356073	0.754511	0.273253	0.123404	0.0789022	0.11357	0.310307	0.705016	0.52062	0.197561	0.940607	0.957643	0.620468	0.850516	0.780509	0.667791	0.990126	0.618933	0.818003	0.250161	0.591121	0.128017	0.594366	0.30209	0.0754343	0.202416	0
SNDF_C1S3	0.0156871	0.0177074	0.965145	0.0259905	0.0942637	0.0678454	0.535339	0.908961	0.718719	0.864638	0.250362	0.677915	0.911142	0.623795	0.0085662	5.13286e-06	0.898361	0.0863988	0.0160292	0.828314	0.757571	0.280106	0.0484376	0.867523	0.213845	0.645246	0.644045	0.728443	0.28228	0.65096	0.3624	0.63346	0.000606853	0.254097	0.0140593	0.0425992	0.494199	0.347133	0.0337768	0.0574793	0.051403	0.74483	0.45532	0.494438	0.15667	0.114063	0.920755	0.904602	0.59211
SMois_C1S3	0.590547	0.248605	0.645275	0.490367	0.855885	0.462076	0.746348	0.766686	0.0204069	0.280628	0.153303	0.652897	0.378518	0.663575	0.677642	0.985193	0.906329	0.804914	0.560322	0.839721	0.520422	0.248065	0.7205	0.89027	0.0653125	0.219005	0.794568	0.611256	0.178193	0.819569	0.854858	0.675562	0.670298	0.922375	0.945048	0.774358	0.423517	0.87992	0.410269	0.482143	0.535527	0.578477	0.66618	0.705882	0.640981	0.557192	0.286015	0.764054	0.0620782
[truncated: 2 more columns]
