# Supplementary material
Source: MDPI journal article supplement (https://www.mdpi.com/2071-1050/15/14/11446)
Supplement: s1 [file s1 › Supplementary Table S7.xlsx]

## Sheet: CORR_MAT
Supplementary Table S7 Correlation Matrix for the cutting 2 x spacing 1, 2, and 3 during second growing season (year 2) for all the 17 traits of 10 Quinoa genotypes
Note: This file has 2 sheets; the first sheet is correlation matrix and the second sheet contains p-values (<0.05 and <0.01). In p-values: the red ones are significant at <0.05 and green at <0.01).
	PH_C2S1	NoL_C2S1	LA_C2S1	Br_C2S1	ID_C2S1	FW_C2S1	DW_C2S1	LCP_C2S1	LCF_C2S1	LADF_C2S1	LNDF_C2S1	LMois_C2S1	SCP_C2S1	SCF_C2S1	SADF_C2S1	SNDF_C2S1	SMois_C2S1	PH_C2S2	NoL_C2S2	LA_C2S2	Br_C2S2	ID_C2S2	FW_C2S2	DW_C2S2	LCP_C2S2	LCF_C2S2	LADF_C2S2	LNDF_C2S2	LMois_C2S2	SCP_C2S2	SCF_C2S2	SADF_C2S2	SNDF_C2S2	SMois_C2S2	PH_C2S3	NoL_C2S3	LA_C2S3	Br_C2S3	ID_C2S3	FW_C2S3	DW_C2S3	LCP_C2S3	LCF_C2S3	LADF_C2S3	LNDF_C2S3	LMois_C2S3	SCP_C2S3	SCF_C2S3	SADF_C2S3
PH_C2S1
NoL_C2S1	0.452777
LA_C2S1	0.15836	0.044672
Br_C2S1	-0.0754872	0.735551	0.171058
ID_C2S1	0.429531	0.265678	0.533605	0.188212
FW_C2S1	0.274296	0.904299	0.00910361	0.750505	0.0233828
DW_C2S1	0.255904	0.851731	0.0839101	0.725258	0.0055439	0.980754
LCP_C2S1	0.679923	0.205166	0.504411	0.110548	0.810115	-0.0161676	0.00177186
LCF_C2S1	-0.324789	0.034887	0.212292	0.178391	-0.0437275	0.0945501	0.134629	-0.357713
LADF_C2S1	0.110529	-0.334274	0.0126519	-0.604076	0.135112	-0.485419	-0.584855	0.0106664	-0.396362
LNDF_C2S1	0.290216	0.0481367	0.186179	-0.220538	0.398576	-0.0868469	-0.214975	0.165879	-0.218644	0.826872
LMois_C2S1	0.216612	0.201357	0.0691849	0.235616	0.397894	0.268691	0.202948	0.199567	0.310059	-0.107479	0.340946
SCP_C2S1	0.319952	-0.27046	0.399238	-0.18664	0.477951	-0.405847	-0.291844	0.743429	-0.146633	-0.21123	-0.323852	-0.133752
SCF_C2S1	0.355925	0.0807089	0.661936	-0.165063	0.279004	0.0414065	0.162864	0.269999	0.451896	-0.132448	-0.0808567	-0.0777942	0.406946
SADF_C2S1	0.3673	0.0669704	-0.251786	-0.0377534	-0.341302	0.168507	0.105728	0.0754652	-0.66033	0.178292	0.181495	0.0554513	-0.20005	-0.447542
SNDF_C2S1	0.711207	0.400449	0.10947	0.0315399	0.248608	0.357509	0.272304	0.31408	-0.0106458	0.183373	0.497835	0.653672	-0.181703	0.129071	0.467241
SMois_C2S1	0.592888	-0.255797	0.32873	-0.638176	0.380927	-0.464342	-0.443318	0.496787	-0.190953	0.532134	0.449006	-0.0973304	0.497289	0.512633	-0.0196943	0.228412
PH_C2S2	0.893775	0.500228	-0.00248233	0.0486865	0.454527	0.232816	0.186835	0.703266	-0.520417	0.129328	0.25955	0.023375	0.337563	0.0895522	0.348935	0.455386	0.519238
NoL_C2S2	0.263544	0.688378	-0.109265	0.513839	0.327364	0.681085	0.636729	0.240969	-0.464442	-0.0823585	0.160466	0.09783	-0.202249	-0.261689	0.17311	0.0923335	-0.269787	0.424006
LA_C2S2	0.501295	0.290983	0.59299	-0.0596943	0.156162	0.268685	0.288611	0.256098	-0.0859632	0.278971	0.330364	-0.0940429	-0.0389925	0.584038	0.218976	0.509278	0.332547	0.246966	0.0746732
Br_C2S2	-0.122286	0.232852	-0.0178498	0.338886	0.271277	0.294122	0.241056	0.122908	-0.558948	0.194936	0.333345	0.0653184	-0.233106	-0.493053	0.19479	-0.141863	-0.285123	0.0765526	0.80801	-0.0724808
ID_C2S2	0.315284	0.69573	0.0228812	0.543201	0.227192	0.580508	0.441442	0.126681	-0.0140524	0.0859382	0.399976	0.426345	-0.482726	-0.226889	0.308591	0.6764	-0.3004	0.292832	0.383914	0.357513	0.186532
FW_C2S2	0.317168	0.456215	0.0289616	0.241652	-0.0208034	0.68613	0.708531	0.0132903	-0.233713	-0.156461	0.1398	0.24378	-0.270062	0.0636019	0.360235	0.28668	-0.0898808	0.209572	0.66345	0.277615	0.505325	0.101801
DW_C2S2	0.181556	0.107345	0.0888613	0.0131189	-0.025376	0.345013	0.439966	0.12647	-0.419886	-0.174444	-0.115494	-0.0926179	0.116547	0.121556	0.253584	-0.103028	0.0218122	0.131761	0.552278	0.176504	0.515233	-0.335778	0.839148
LCP_C2S2	0.532501	0.215004	0.11275	-0.0292896	-0.0533438	0.301308	0.387532	0.16289	0.381936	-0.506679	-0.314025	0.303851	0.270817	0.596339	0.0457911	0.440848	0.251693	0.251601	-0.212231	0.207865	-0.607246	-0.101393	0.301016	0.185124
LCF_C2S2	-0.0778942	0.127557	0.695638	0.184153	-0.00703417	0.289784	0.330173	-0.0773557	0.104318	0.139692	0.285308	-0.0636972	-0.258723	0.39216	0.0623081	0.101856	-0.00216997	-0.260881	0.0865007	0.695413	0.233098	0.137386	0.421164	0.336133	-0.0475296
LADF_C2S2	0.312839	-0.524844	0.151177	-0.730592	0.129465	-0.604852	-0.625891	0.292223	-0.557812	0.797637	0.601878	-0.136171	0.236701	0.0248816	0.368974	0.157845	0.769756	0.285889	-0.201537	0.258858	0.0810718	-0.269599	-0.022484	0.137865	-0.17396	0.109575
LNDF_C2S2	0.201756	-0.453396	0.158003	-0.64958	0.153328	-0.489726	-0.540199	0.0538504	0.130702	0.636338	0.601171	0.410235	-0.0342989	0.189371	0.0764267	0.541853	0.510404	-0.0771565	-0.510384	0.30024	-0.331472	0.0801044	-0.235464	-0.338403	0.0882593	0.0614988	0.585177
LMois_C2S2	0.406674	0.0356611	0.03189	-0.0246204	0.391727	0.109042	0.181709	0.496881	-0.14382	-0.327752	-0.117034	0.401469	0.525907	0.157551	0.00546775	0.09845	0.271543	0.36375	0.293485	-0.245504	0.166716	-0.362386	0.486105	0.596008	0.489989	-0.254505	0.095827	-0.0985083
SCP_C2S2	0.114196	-0.325947	-0.0192772	-0.169292	0.125289	-0.476236	-0.39361	0.46626	-0.252266	-0.259495	-0.498072	-0.374901	0.842677	0.0429074	-0.081774	-0.427818	0.315973	0.306515	-0.250342	-0.390717	-0.262029	-0.554288	-0.42557	-0.0262745	0.113153	-0.543243	0.148716	-0.280496	0.360359
SCF_C2S2	-0.215981	-0.0607465	0.291764	0.0665002	-0.256142	0.115976	0.292015	-0.126103	0.302376	-0.593122	-0.758807	-0.441168	0.313092	0.5604	-0.337492	-0.43785	-0.192082	-0.351561	-0.151527	0.202743	-0.282935	-0.4621	0.0710583	0.353195	0.344544	0.276274	-0.392218	-0.393796	0.0427534	0.208248
SADF_C2S2	0.438157	0.000145388	-0.066687	-0.325741	-0.0937854	0.14001	0.215822	0.172599	-0.543485	0.0566556	0.00436332	-0.194405	0.191485	0.173902	0.388176	0.0373864	0.369753	0.382184	0.373401	0.223933	0.267975	-0.401715	0.717766	0.880055	0.312505	0.133397	0.4233	-0.122859	0.59029	0.115397	0.190623
SNDF_C2S2	0.670761	0.169878	-0.208818	-0.293251	0.539526	-0.0953595	-0.131446	0.568762	-0.309039	0.211823	0.18227	0.158168	0.398171	0.0966801	-0.0377271	0.349723	0.467349	0.693603	0.242326	0.0292705	-0.0527958	0.118003	-0.0887914	-0.0528672	0.159774	-0.598028	0.223605	0.233731	0.387518	0.288498	-0.291787	0.197153
SMois_C2S2	0.745795	0.207172	0.284388	0.0328172	0.337417	-0.02099	-0.0130496	0.780783	-0.40754	-0.0293628	-0.0184726	-0.0935125	0.616996	0.212964	0.396785	0.373629	0.483847	0.775084	-0.0193737	0.340847	-0.23801	0.180522	-0.129026	-0.0603821	0.315023	-0.145832	0.292657	0.000170169	0.184384	0.556719	-0.0721037	0.153966	0.432478
PH_C2S3	0.912293	0.390656	0.199613	0.0376178	0.558508	0.215539	0.191109	0.837924	-0.562722	0.125023	0.317183	0.218279	0.433763	0.1293	0.451391	0.568466	0.525452	0.918154	0.424296	0.350373	0.181974	0.273155	0.34432	0.300163	0.295069	-0.0876993	0.394303	0.06454	0.52029	0.25191	-0.315807	0.471582	0.626973	0.78812
NoL_C2S3	0.454643	0.835799	0.155533	0.661306	0.548443	0.730447	0.703728	0.507764	-0.303582	-0.233445	0.0981547	0.151715	0.0371657	-0.00442004	0.0522809	0.202318	-0.138831	0.589867	0.903292	0.196907	0.595267	0.473978	0.532116	0.39726	-0.0125276	0.0996501	-0.291011	-0.523212	0.326657	-0.0941663	-0.0740822	0.228718	0.318488	0.266889	0.582368
LA_C2S3	0.298772	0.186996	0.804425	0.357001	0.37185	0.136001	0.213044	0.639892	-0.0692667	-0.254653	-0.153849	-0.0875354	0.537979	0.443557	0.0935449	0.1287	0.135116	0.223029	-0.0180161	0.541919	-0.0558749	0.142377	-0.0180156	0.100974	0.176901	0.465509	0.00960419	-0.136978	0.0243485	0.271431	0.376031	-0.0276605	-0.13079	0.649309	0.393027	0.288026
Br_C2S3	0.22102	0.374664	0.320576	0.491618	0.604205	0.403879	0.356569	0.464115	-0.173934	-0.0251075	0.441631	0.627863	0.000157673	-0.165717	0.134717	0.30379	-0.0390788	0.26072	0.597291	-0.0201926	0.672471	0.320378	0.543078	0.361537	-0.0714473	0.246977	0.0367906	-0.0786593	0.511478	-0.218726	-0.410391	0.138895	0.0133899	0.0378954	0.464159	0.624577	0.198669
ID_C2S3	0.353367	0.63455	0.395979	0.526263	0.320811	0.541521	0.447343	0.179432	0.309596	0.0292312	0.488136	0.527443	-0.352687	0.159775	0.112123	0.685473	-0.0125399	0.243682	0.14442	0.435993	-0.0193377	0.792393	0.177284	-0.301349	0.186203	0.405401	-0.179354	0.177676	-0.202621	-0.534024	-0.375424	-0.361468	-0.111001	0.191748	0.264191	0.357397	0.300085	0.457125
FW_C2S3	0.386041	0.825962	0.00593911	0.672062	0.218373	0.921525	0.924994	0.198919	0.0565084	-0.568645	-0.158719	0.437218	-0.153198	0.0784023	0.115994	0.404412	-0.393332	0.308085	0.708325	0.172461	0.296962	0.478511	0.691076	0.432771	0.41406	0.0991065	-0.577982	-0.416158	0.404794	-0.3129	0.13814	0.226661	0.15147	0.0543031	0.363066	0.775242	0.151204	0.495088	0.399863
DW_C2S3	0.338297	0.796406	-0.0314312	0.707408	0.0477398	0.929253	0.947862	0.130301	0.0214837	-0.664503	-0.275201	0.318683	-0.145257	0.0357453	0.216322	0.302458	-0.417612	0.299646	0.656697	0.103895	0.26035	0.373435	0.726042	0.492834	0.462694	0.118156	-0.580841	-0.557523	0.411492	-0.209049	0.198671	0.298453	-0.0101395	0.0975695	0.334087	0.720862	0.182402	0.454493	0.353955	0.959075
LCP_C2S3	0.407757	0.250393	0.623239	0.217302	0.560803	0.258389	0.313568	0.47387	0.533446	-0.332496	0.0643351	0.656298	0.343188	0.652475	-0.283626	0.498541	0.242167	0.12232	-0.0936811	0.297168	-0.2842	0.140075	0.187664	0.0276535	0.658383	0.226516	-0.163172	0.279834	0.464947	-0.0836372	0.14702	-0.0628995	0.134376	0.214717	0.30959	0.196719	0.439305	0.417991	0.514729	0.422401	0.33649
LCF_C2S3	0.282589	-0.0224204	-0.0773851	-0.248218	-0.416586	0.204848	0.197269	-0.278871	0.109606	0.0771488	0.243309	0.360958	-0.365737	0.132417	0.511191	0.569175	0.176154	-0.00732626	-0.194206	0.278104	-0.246709	0.0479483	0.516675	0.24586	0.570951	0.289165	0.245083	0.409752	0.158037	-0.42889	-0.124041	0.394042	-0.226115	-0.0611862	0.103537	-0.278788	-0.177981	0.0599825	0.29014	0.139562	0.216542	0.241649
LADF_C2S3	0.148976	-0.304326	0.103851	-0.49892	0.276405	-0.459336	-0.559761	0.187798	-0.474493	0.943498	0.790131	-0.00813653	-0.104782	-0.18259	0.23854	0.265121	0.43557	0.150008	-0.0148232	0.335192	0.275267	0.215973	-0.195487	-0.183803	-0.558715	0.134068	0.754244	0.650377	-0.308398	-0.228974	-0.578836	-0.0204382	0.284394	0.0834673	0.221571	-0.1331	-0.0742739	0.0672785	0.0545003	-0.477178	-0.614905	-0.257574	-0.0486635
LNDF_C2S3	0.247414	-0.285279	0.0583881	-0.654483	0.0734189	-0.389563	-0.468047	-0.0146049	-0.302972	0.943738	0.841107	-0.046009	-0.222963	0.0480832	0.215932	0.296961	0.661496	0.186684	-0.123185	0.368632	0.0775748	0.0167369	0.0289172	-0.0471166	-0.240697	0.231874	0.832722	0.677298	-0.191279	-0.310145	-0.536063	0.23176	0.174118	-0.0118432	0.19173	-0.253392	-0.263156	-0.00254125	0.108837	-0.484428	-0.546451	-0.177894	0.343508	0.821776
LMois_C2S3	0.315725	-0.298905	0.31537	-0.160882	0.523322	-0.285695	-0.283783	0.614332	-0.111684	0.0833436	0.265749	0.665	0.493761	0.0166646	0.188176	0.424313	0.333606	0.165426	-0.142859	-0.0433371	0.0311142	-0.0276565	0.0101759	0.053916	0.207346	-0.107028	0.399246	0.516953	0.573827	0.210202	-0.311309	0.0622892	0.28174	0.327805	0.469259	-0.0497606	0.27051	0.519225	0.0949117	-0.00823788	-0.0823413	0.552642	0.169557	0.249538	0.0954385
SCP_C2S3	0.0239935	-0.537711	0.118346	-0.456134	0.089897	-0.565293	-0.44016	0.381673	-0.403373	-0.0218701	-0.414358	-0.510005	0.793451	0.18571	-0.0790782	-0.476788	0.337102	0.0778735	-0.17527	-0.0615105	-0.0658793	-0.690615	-0.246621	0.297436	-0.0391809	-0.224669	0.355965	-0.0858033	0.303247	0.75833	0.4539	0.375992	0.273824	0.33139	0.153222	-0.165773	0.284827	-0.306648	-0.784587	-0.364976	-0.342923	-0.164737	-0.403047	0.060208	-0.0983075	0.203088
SCF_C2S3	0.310046	0.104765	0.606418	-0.0782268	-0.0112802	0.119416	0.252986	0.185986	0.256542	-0.228737	-0.291659	-0.346298	0.356226	0.880211	-0.160892	0.0653461	0.328021	0.0711806	-0.256703	0.70076	-0.492171	-0.173418	0.0703645	0.183894	0.5429	0.484918	-0.0217803	-0.00465695	-0.0508539	0.0973534	0.728448	0.223556	-0.0877071	0.350259	0.103274	-0.0223958	0.616919	-0.348072	0.0853431	0.0778015	0.107722	0.408468	0.138667	-0.241517	-0.079435	-0.166827	0.278471
SADF_C2S3	0.369224	0.135436	-0.0298757	0.0445207	-0.177915	0.327953	0.286121	0.112586	-0.466805	0.100814	0.235044	0.337474	-0.241089	-0.261305	0.883075	0.637239	-0.111628	0.191274	0.245534	0.40235	0.259923	0.409389	0.539176	0.374953	0.155699	0.286522	0.256106	0.220727	0.103988	-0.348079	-0.213302	0.377173	-0.062528	0.240915	0.423462	0.134743	0.187789	0.313698	0.249851	0.341976	0.359971	0.0346733	0.596503	0.228801	0.159054	0.355989	-0.170259	-0.0510611
SNDF_C2S3	0.5001	0.244626	-0.610153	-0.0970542	0.0234578	0.218904	0.125003	0.135211	-0.351565	0.0648216	0.147358	0.45616	-0.155744	-0.404099	0.50594	0.607239	-0.0505701	0.457285	0.315989	-0.101804	0.0699334	0.409807	0.217052	0.0210507	0.201729	-0.5571	0.0361007	0.217103	0.285355	-0.108438	-0.475712	0.195619	0.639946	0.187123	0.45872	0.210745	-0.381573	0.110821	0.0365264	0.389233	0.297372	-0.0417444	0.260748	0.15098	0.0579322	0.273808	-0.161443	-0.42722	0.511926
SMois_C2S3	0.705449	0.611524	0.328022	0.243915	0.426944	0.440497	0.339963	0.45592	-0.189434	0.317388	0.613515	0.341802	-0.17709	0.14483	0.389391	0.826876	0.248093	0.601802	0.327135	0.690262	0.107709	0.815881	0.238783	-0.114562	0.109598	0.315026	0.173136	0.293124	-0.140212	-0.412403	-0.436929	-0.0315097	0.298562	0.495124	0.642712	0.490355	0.364288	0.374262	0.798175	0.374464	0.276002	0.330918	0.225308	0.409737	0.353501	0.168918	-0.455843	0.149415	0.485589
[truncated: 2 more columns]

## Sheet: P_VALUES
	PH_C2S1	NoL_C2S1	LA_C2S1	Br_C2S1	ID_C2S1	FW_C2S1	DW_C2S1	LCP_C2S1	LCF_C2S1	LADF_C2S1	LNDF_C2S1	LMois_C2S1	SCP_C2S1	SCF_C2S1	SADF_C2S1	SNDF_C2S1	SMois_C2S1	PH_C2S2	NoL_C2S2	LA_C2S2	Br_C2S2	ID_C2S2	FW_C2S2	DW_C2S2	LCP_C2S2	LCF_C2S2	LADF_C2S2	LNDF_C2S2	LMois_C2S2	SCP_C2S2	SCF_C2S2	SADF_C2S2	SNDF_C2S2	SMois_C2S2	PH_C2S3	NoL_C2S3	LA_C2S3	Br_C2S3	ID_C2S3	FW_C2S3	DW_C2S3	LCP_C2S3	LCF_C2S3	LADF_C2S3	LNDF_C2S3	LMois_C2S3	SCP_C2S3	SCF_C2S3	SADF_C2S3
PH_C1S1	0	0.188843	0.662145	0.835809	0.215407	0.443121	0.475451	0.0305268	0.359847	0.76115	0.415975	0.547776	0.36746	0.312776	0.296434	0.0211022	0.0708482	0.000489119	0.461898	0.139921	0.736464	0.374882	0.371877	0.615682	0.113053	0.830636	0.378798	0.576189	0.243501	0.753428	0.54897	0.205313	0.0337521	0.013265	0.000232626	0.186799	0.401719	0.539453	0.316515	0.27053	0.33901	0.242126	0.428881	0.681252	0.490713	0.374177	0.947544	0.383297	0.293716
NoL_C1S1	0.188843	6.6469e-64	0.902475	0.0153266	0.458143	0.000326499	0.0017609	0.569619	0.923778	0.345149	0.894945	0.57696	0.44978	0.824595	0.854157	0.25149	0.475641	0.140903	0.0277426	0.414687	0.517367	0.0254673	0.185086	0.767871	0.550824	0.725466	0.119318	0.188163	0.922091	0.358036	0.867606	0.999682	0.638931	0.565767	0.264348	0.00259558	0.604952	0.286103	0.0487523	0.00323479	0.00583164	0.485333	0.95098	0.392592	0.424307	0.401498	0.10891	0.773325	0.709108
LA_C1S1	0.662145	0.902475	0	0.636569	0.112167	0.980087	0.817734	0.137079	0.55598	0.972328	0.606558	0.84938	0.253061	0.03707	0.482827	0.763383	0.353702	0.99457	0.763816	0.0707876	0.960966	0.949974	0.9367	0.807144	0.756471	0.0254949	0.676755	0.662868	0.930312	0.957847	0.413378	0.854769	0.562613	0.42582	0.580333	0.667882	0.0050176	0.366472	0.257315	0.987009	0.931312	0.0542181	0.83173	0.77526	0.87271	0.374744	0.744713	0.063074	0.934705
Br_C1S1	0.835809	0.0153266	0.636569	0	0.602564	0.0123856	0.0176131	0.761111	0.621953	0.0643773	0.54036	0.512263	0.605652	0.648602	0.917532	0.931075	0.0470814	0.89375	0.128694	0.869883	0.338117	0.10465	0.501189	0.971307	0.935984	0.610551	0.0164005	0.0420756	0.946176	0.640107	0.855172	0.358358	0.41089	0.92829	0.917827	0.0373151	0.311211	0.148978	0.118142	0.0332807	0.0221216	0.546469	0.489259	0.142112	0.0400383	0.657038	0.185174	0.829922	0.902804
ID_C1S1	0.215407	0.458143	0.112167	0.602564	6.6469e-64	0.948878	0.987873	0.00449148	0.904529	0.709779	0.253922	0.25481	0.162362	0.43501	0.334461	0.488554	0.277472	0.186925	0.355826	0.666604	0.448357	0.527885	0.954512	0.944526	0.883642	0.984614	0.721494	0.672369	0.262925	0.730193	0.475026	0.796639	0.10749	0.340348	0.0933331	0.100682	0.290027	0.0643053	0.366102	0.544444	0.895807	0.0917066	0.231079	0.439479	0.840259	0.120589	0.804932	0.975328	0.622898
FW_C1S1	0.443121	0.000326499	0.980087	0.0123856	0.948878	0	5.86566e-07	0.964643	0.795011	0.154963	0.811449	0.452866	0.244554	0.909578	0.641681	0.310473	0.176383	0.517434	0.0301334	0.452876	0.409437	0.0784864	0.0284652	0.328886	0.397538	0.4167	0.0639437	0.15079	0.764287	0.164091	0.749686	0.699662	0.793288	0.954105	0.549808	0.0164328	0.707941	0.24707	0.105942	0.000150805	0.000100565	0.471024	0.57023	0.181714	0.265805	0.423603	0.0885776	0.742471	0.35491
DW_C1S1	0.475451	0.0017609	0.817734	0.0176131	0.987873	5.86566e-07	6.6469e-64	0.996124	0.710778	0.0757464	0.550878	0.57389	0.413244	0.653035	0.771288	0.446573	0.199407	0.605268	0.0477436	0.418675	0.502278	0.201543	0.0218167	0.203231	0.268525	0.351466	0.0529022	0.106967	0.615377	0.260432	0.412958	0.549272	0.717378	0.971459	0.596886	0.023141	0.554548	0.311839	0.194871	0.000126397	3.03498e-05	0.377628	0.584879	0.0924431	0.172496	0.426848	0.20301	0.480673	0.422881
LCP_C1S1	0.0305268	0.569619	0.137079	0.761111	0.00449148	0.964643	0.996124	6.6469e-64	0.310178	0.97667	0.64696	0.580422	0.0137228	0.450582	0.835857	0.376807	0.144097	0.0232713	0.502436	0.475104	0.735165	0.72729	0.970933	0.72773	0.652983	0.831793	0.41261	0.882543	0.14401	0.174364	0.728495	0.633487	0.0862077	0.00768087	0.0024705	0.134059	0.046304	0.176622	0.619887	0.581678	0.719757	0.166494	0.435238	0.603376	0.968059	0.0587975	0.276454	0.606938	0.756817
LCF_C1S1	0.359847	0.923778	0.55598	0.621953	0.904529	0.795011	0.710778	0.310178	6.6469e-64	0.256813	0.543931	0.383276	0.686048	0.189812	0.0376966	0.976715	0.597192	0.123037	0.176277	0.813339	0.0930201	0.969266	0.515775	0.227024	0.276095	0.774272	0.09383	0.718925	0.69182	0.481964	0.395785	0.104433	0.384926	0.242401	0.0903612	0.393808	0.849204	0.630823	0.384024	0.876782	0.953026	0.112294	0.763097	0.16586	0.394806	0.758716	0.24772	0.474313	0.173794
LADF_C1S1	0.76115	0.345149	0.972328	0.0643773	0.709779	0.154963	0.0757464	0.97667	0.256813	0	0.0031714	0.767588	0.558004	0.715299	0.622149	0.61209	0.113348	0.721779	0.821058	0.435067	0.589415	0.813393	0.665997	0.629806	0.135031	0.700318	0.005701	0.0479233	0.355222	0.469058	0.0707086	0.876463	0.556874	0.935824	0.730747	0.51627	0.477687	0.945112	0.936111	0.0862867	0.0360829	0.347881	0.832238	4.16379e-05	4.0945e-05	0.818947	0.952182	0.525006	0.781697
LNDF_C1S1	0.415975	0.894945	0.606558	0.54036	0.253922	0.811449	0.550878	0.64696	0.543931	0.0031714	0	0.334999	0.361314	0.824278	0.615802	0.14312	0.193014	0.468961	0.657881	0.351171	0.346576	0.252104	0.700094	0.7507	0.376896	0.424258	0.0656166	0.066019	0.747465	0.1429	0.0109365	0.990455	0.614269	0.959605	0.371853	0.787343	0.671308	0.201327	0.152322	0.661417	0.441556	0.859848	0.498166	0.00653118	0.00229135	0.458018	0.23384	0.413554	0.513317
LMois_C1S1	0.547776	0.57696	0.84938	0.512263	0.25481	0.452866	0.57389	0.580422	0.383276	0.767588	0.334999	1.0635e-62	0.712596	0.830851	0.879073	0.0403704	0.789095	0.948895	0.788033	0.796091	0.857724	0.219206	0.497309	0.799127	0.393368	0.861226	0.707589	0.238996	0.250172	0.285774	0.201855	0.59045	0.662535	0.797221	0.544623	0.675657	0.809977	0.0519373	0.117168	0.206399	0.36947	0.0393012	0.305489	0.982203	0.899568	0.035894	0.132065	0.326968	0.340261
SCP_C1S1	0.36746	0.44978	0.253061	0.605652	0.162362	0.244554	0.413244	0.0137228	0.686048	0.558004	0.361314	0.712596	0	0.243156	0.579487	0.61539	0.143629	0.340127	0.575238	0.914833	0.516897	0.157608	0.450473	0.748489	0.449157	0.47043	0.510264	0.925059	0.118436	0.00220652	0.378392	0.596151	0.254449	0.0574021	0.21042	0.918812	0.1087	0.999655	0.317513	0.672634	0.68887	0.331623	0.298653	0.773289	0.5358	0.146942	0.00615405	0.312338	0.502218
SCF_C1S1	0.312776	0.824595	0.03707	0.648602	0.43501	0.909578	0.653035	0.450582	0.189812	0.715299	0.824278	0.830851	0.243156	0	0.194648	0.722313	0.129748	0.805668	0.465173	0.0762568	0.147613	0.528451	0.861432	0.737991	0.0688089	0.262351	0.945605	0.60029	0.663786	0.906313	0.0919907	0.630887	0.790478	0.554701	0.721837	0.990331	0.199136	0.647286	0.659279	0.829545	0.921907	0.0408646	0.715363	0.613637	0.895061	0.963556	0.607482	0.000777693	0.465851
SADF_C1S1	0.296434	0.854157	0.482827	0.917532	0.334461	0.641681	0.771288	0.835857	0.0376966	0.622149	0.615802	0.879073	0.579487	0.194648	0	0.173338	0.956935	0.323047	0.632468	0.543305	0.5897	0.385651	0.30653	0.479601	0.900042	0.864229	0.294069	0.83379	0.98804	0.822311	0.340234	0.26766	0.917589	0.25626	0.19037	0.885948	0.797152	0.710597	0.757792	0.749649	0.548325	0.427115	0.131016	0.506886	0.549063	0.602635	0.828094	0.65702	0.000708489
SNDF_C1S1	0.0211022	0.25149	0.763383	0.931075	0.488554	0.310473	0.446573	0.376807	0.976715	0.61209	0.14312	0.0403704	0.61539	0.722313	0.173338	0	0.52561	0.185988	0.799734	0.132709	0.695844	0.031741	0.421936	0.777004	0.202221	0.779487	0.66319	0.105687	0.786716	0.217444	0.205667	0.918331	0.321882	0.287543	0.0864082	0.575105	0.723086	0.393468	0.0286787	0.246387	0.395649	0.142464	0.0859278	0.459122	0.404716	0.221649	0.163533	0.857664	0.0475096
SMois_C1S1	0.0708482	0.475641	0.353702	0.0470814	0.277472	0.176383	0.199407	0.144097	0.597192	0.113348	0.193014	0.789095	0.143629	0.129748	0.956935	0.52561	0	0.124039	0.450952	0.347802	0.424573	0.399032	0.804966	0.952308	0.482995	0.995253	0.00921319	0.131711	0.447895	0.373782	0.594983	0.292971	0.173225	0.156503	0.118813	0.702093	0.709771	0.914646	0.972573	0.260799	0.229814	0.500249	0.6264	0.208311	0.0372411	0.346174	0.340828	0.354803	0.758834
PH_C1S2	0.000489119	0.140903	0.99457	0.89375	0.186925	0.517434	0.605268	0.0232713	0.123037	0.721779	0.468961	0.948895	0.340127	0.805668	0.323047	0.185988	0.124039	0	0.22202	0.491524	0.833519	0.411591	0.561171	0.716726	0.483159	0.466602	0.423274	0.832221	0.301484	0.389021	0.319169	0.275757	0.0261119	0.0084482	0.000177688	0.0726657	0.535676	0.466888	0.497486	0.386471	0.400275	0.736393	0.983975	0.679143	0.605565	0.647871	0.830681	0.845079	0.596563
NoL_C1S2	0.461898	0.0277426	0.763816	0.128694	0.355826	0.0301334	0.0477436	0.502436	0.176277	0.821058	0.657881	0.788033	0.575238	0.465173	0.632468	0.799734	0.450952	0.22202	0	0.83756	0.00468123	0.273406	0.0364856	0.09784	0.556097	0.812189	0.576613	0.131729	0.410501	0.485425	0.676041	0.287861	0.499959	0.957636	0.221669	0.000340023	0.960603	0.0682535	0.690589	0.0218726	0.0391402	0.796862	0.590837	0.967581	0.734585	0.693795	0.628159	0.474026	0.49412
LA_C1S2	0.139921	0.414687	0.0707876	0.869883	0.666604	0.452876	0.418675	0.475104	0.813339	0.435067	0.351171	0.796091	0.914833	0.0762568	0.543305	0.132709	0.347802	0.491524	0.83756	0	0.842278	0.310467	0.437395	0.625702	0.564438	0.0255627	0.470191	0.399296	0.494175	0.264267	0.574285	0.533981	0.936026	0.335148	0.32092	0.585581	0.105635	0.955847	0.207819	0.633764	0.775167	0.404373	0.436555	0.343745	0.294551	0.905378	0.865954	0.0239864	0.249036
Br_C1S2	0.736464	0.517367	0.960966	0.338117	0.448357	0.409437	0.502278	0.735165	0.0930201	0.589415	0.346576	0.857724	0.516897	0.147613	0.5897	0.695844	0.424573	0.833519	0.00468123	0.842278	0	0.605865	0.136252	0.127482	0.0626169	0.516912	0.823817	0.349458	0.645277	0.464572	0.428292	0.454117	0.884831	0.507857	0.614855	0.0694386	0.878155	0.0331331	0.957715	0.404715	0.467543	0.426138	0.491989	0.441443	0.831323	0.932004	0.856513	0.148452	0.4683
ID_C1S2	0.374882	0.0254673	0.949974	0.10465	0.527885	0.0784864	0.201543	0.72729	0.969266	0.813393	0.252104	0.219206	0.157608	0.528451	0.385651	0.031741	0.399032	0.411591	0.273406	0.310467	0.605865	0	0.779603	0.342847	0.780468	0.705076	0.45128	0.825892	0.303437	0.0963713	0.178759	0.249854	0.745432	0.617728	0.445096	0.166384	0.694786	0.366785	0.00627255	0.1618	0.287814	0.699528	0.895354	0.548987	0.963398	0.939548	0.0270363	0.631853	0.240062
FW_C1S2	0.371877	0.185086	0.9367	0.501189	0.954512	0.0284652	0.0218167	0.970933	0.515775	0.665997	0.700094	0.497309	0.450473	0.861432	0.30653	0.421936	0.804966	0.561171	0.0364856	0.437395	0.136252	0.779603	0	0.00240049	0.398018	0.225465	0.950841	0.512542	0.154294	0.220135	0.845343	0.019419	0.807293	0.722407	0.329923	0.113363	0.960604	0.104744	0.624153	0.0268921	0.0174311	0.60364	0.126236	0.588343	0.936797	0.977743	0.492149	0.846837	0.107763
DW_C1S2	0.615682	0.767871	0.807144	0.971307	0.944526	0.328886	0.203231	0.72773	0.227024	0.629806	0.7507	0.799127	0.748489	0.737991	0.479601	0.777004	0.952308	0.716726	0.09784	0.625702	0.127482	0.342847	0.00240049	0	0.608637	0.342305	0.704087	0.338849	0.0690032	0.942564	0.316767	0.000781596	0.884676	0.868395	0.399423	0.255638	0.781357	0.304656	0.39747	0.211584	0.147821	0.939554	0.493528	0.611242	0.897161	0.882401	0.403929	0.611061	0.285702
LCP_C1S2	0.113053	0.550824	0.756471	0.935984	0.883642	0.397538	0.268525	0.652983	0.276095	0.135031	0.376896	0.393368	0.449157	0.0688089	0.900042	0.202221	0.482995	0.483159	0.556097	0.564438	0.0626169	0.780468	0.398018	0.608637	0	0.896263	0.630772	0.80843	0.150538	0.755622	0.329589	0.379335	0.659281	0.375298	0.407859	0.9726	0.624912	0.844504	0.606512	0.234209	0.178127	0.0384657	0.0847332	0.0931853	0.502934	0.565434	0.914423	0.104881	0.667547
LCF_C1S2	0.830636	0.725466	0.0254949	0.610551	0.984614	0.4167	0.351466	0.831793	0.774272	0.700318	0.424258	0.861226	0.47043	0.262351	0.864229	0.779487	0.995253	0.466602	0.812189	0.0255627	0.516912	0.705076	0.225465	0.342305	0.896263	0	0.763162	0.865979	0.477951	0.104618	0.439704	0.713332	0.0678252	0.68769	0.809626	0.784167	0.175153	0.491503	0.245123	0.785321	0.745112	0.529147	0.417742	0.71194	0.519179	0.768541	0.532601	0.155453	0.422202
LADF_C1S2	0.378798	0.119318	0.676755	0.0164005	0.721494	0.0639437	0.0529022	0.41261	0.09383	0.005701	0.0656166	0.707589	0.510264	0.945605	0.294069	0.66319	0.00921319	0.423274	0.576613	0.470191	0.823817	0.45128	0.950841	0.704087	0.630772	0.763162	0	0.0755458	0.792293	0.681783	0.262274	0.222872	0.534596	0.411883	0.259519	0.41464	0.978993	0.919629	0.620043	0.0801072	0.078274	0.652414	0.494939	0.0117172	0.00278471	0.25305	0.312718	0.952378	0.475091
LNDF_C1S2	0.576189	0.188163	0.662868	0.0420756	0.672369	0.15079	0.106967	0.882543	0.718925	0.0479233	0.066019	0.238996	0.925059	0.60029	0.83379	0.105687	0.131711	0.832221	0.131729	0.399296	0.349458	0.825892	0.512542	0.338849	0.80843	0.865979	0.0755458	0	0.786592	0.432455	0.260187	0.735266	0.515742	0.999628	0.859405	0.120681	0.705919	0.828993	0.623373	0.231608	0.0940368	0.433588	0.239604	0.0417397	0.0314284	0.125997	0.813681	0.989813	0.540005
LMois_C1S2	0.243501	0.922091	0.930312	0.946176	0.262925	0.764287	0.615377	0.14401	0.69182	0.355222	0.747465	0.250172	0.118436	0.663786	0.98804	0.786716	0.447895	0.301484	0.410501	0.494175	0.645277	0.303437	0.154294	0.0690032	0.150538	0.477951	0.792293	0.786592	0	0.306351	0.906648	0.0724094	0.268543	0.610096	0.123145	0.356927	0.946769	0.130764	0.57452	0.245899	0.237417	0.175745	0.662799	0.385964	0.596553	0.0828208	0.394355	0.889044	0.77497
SCP_C1S2	0.753428	0.358036	0.957847	0.640107	0.730193	0.164091	0.260432	0.174364	0.481964	0.469058	0.1429	0.285774	0.00220652	0.906313	0.822311	0.217444	0.373782	0.389021	0.485425	0.264267	0.464572	0.0963713	0.220135	0.942564	0.755622	0.104618	0.681783	0.432455	0.306351	0	0.563704	0.750903	0.418866	0.0946137	0.482605	0.795828	0.448089	0.543777	0.111832	0.3787	0.56217	0.818318	0.216168	0.524565	0.383137	0.559966	0.0110163	0.789046	0.324318
SCF_C1S2	0.54897	0.867606	0.413378	0.855172	0.475026	0.749686	0.412958	0.728495	0.395785	0.0707086	0.0109365	0.201855	0.378392	0.0919907	0.340234	0.205667	0.594983	0.319169	0.676041	0.574285	0.428292	0.178759	0.845343	0.316767	0.329589	0.439704	0.262274	0.260187	0.906648	0.563704	0	0.597837	0.413339	0.843091	0.374047	0.838832	0.284208	0.238801	0.285048	0.703519	0.582159	0.685256	0.732796	0.0795572	0.11021	0.38126	0.18761	0.0168807	0.554058
SADF_C1S2	0.205313	0.999682	0.854769	0.358358	0.796639	0.699662	0.549272	0.633487	0.104433	0.876463	0.990455	0.59045	0.596151	0.630887	0.26766	0.918331	0.292971	0.275757	0.287861	0.533981	0.454117	0.249854	0.019419	0.000781596	0.379335	0.713332	0.222872	0.735266	0.0724094	0.750903	0.597837	0	0.585104	0.671071	0.168837	0.525041	0.939539	0.701962	0.304754	0.528876	0.402246	0.86295	0.259863	0.95531	0.51939	0.86427	0.284261	0.534688	0.282628
SNDF_C1S2	0.0337521	0.638931	0.562613	0.41089	0.10749	0.793288	0.717378	0.0862077	0.384926	0.556874	0.614269	0.662535	0.254449	0.790478	0.917589	0.321882	0.173225	0.0261119	0.499959	0.936026	0.884831	0.745432	0.807293	0.884676	0.659281	0.0678252	0.534596	0.515742	0.268543	0.418866	0.413339	0.585104	0	0.211927	0.0523712	0.369779	0.718741	0.970715	0.760155	0.676157	0.977822	0.711304	0.529896	0.425809	0.630457	0.430329	0.443938	0.80961	0.863754
SMois_C1S2	0.013265	0.565767	0.42582	0.92829	0.340348	0.954105	0.971459	0.00768087	0.242401	0.935824	0.959605	0.797221	0.0574021	0.554701	0.25626	0.287543	0.156503	0.0084482	0.957636	0.335148	0.507857	0.617728	0.722407	0.868395	0.375298	0.68769	0.411883	0.999628	0.610096	0.0946137	0.843091	0.671071	0.211927	0	0.0067674	0.456018	0.0421902	0.917223	0.595635	0.881562	0.788587	0.551369	0.866655	0.818682	0.974097	0.355139	0.349585	0.321088	0.502536
PH_C1S3	0.000232626	0.264348	0.580333	0.917827	0.0933331	0.549808	0.596886	0.0024705	0.0903612	0.730747	0.371853	0.544623	0.21042	0.721837	0.19037	0.0864082	0.118813	0.000177688	0.221669	0.32092	0.614855	0.445096	0.329923	0.399423	0.407859	0.809626	0.259519	0.859405	0.123145	0.482605	0.374047	0.168837	0.0523712	0.0067674	0	0.0773064	0.261203	0.176576	0.460757	0.302463	0.345436	0.384033	0.775926	0.538416	0.595671	0.171238	0.672586	0.776482	0.222676
NoL_C1S3	0.186799	0.00259558	0.667882	0.0373151	0.100682	0.0164328	0.023141	0.134059	0.393808	0.51627	0.787343	0.675657	0.918812	0.990331	0.885948	0.575105	0.702093	0.0726657	0.000340023	0.585581	0.0694386	0.166384	0.113363	0.255638	0.9726	0.784167	0.41464	0.120681	0.356927	0.795828	0.838832	0.525041	0.369779	0.456018	0.0773064	0	0.419662	0.0535515	0.310636	0.00842632	0.018658	0.585947	0.43538	0.713948	0.479945	0.891418	0.647174	0.951034	0.710543
LA_C1S3	0.401719	0.604952	0.0050176	0.311211	0.290027	0.707941	0.554548	0.046304	0.849204	0.477687	0.671308	0.809977	0.1087	0.199136	0.797152	0.723086	0.709771	0.535676	0.960603	0.105635	0.878155	0.694786	0.960604	0.781357	0.624912	0.175153	0.978993	0.705919	0.946769	0.448089	0.284208	0.939539	0.718741	0.0421902	0.261203	0.419662	0	0.582162	0.399551	0.676699	0.614007	0.20399	0.622767	0.838419	0.462581	0.449693	0.425075	0.0574423	0.603394
Br_C1S3	0.539453	0.286103	0.366472	0.148978	0.0643053	0.24707	0.311839	0.176622	0.630823	0.945112	0.201327	0.0519373	0.999655	0.647286	0.710597	0.393468	0.914646	0.466888	0.0682535	0.955847	0.0331331	0.366785	0.104744	0.304656	0.844504	0.491503	0.919629	0.828993	0.130764	0.543777	0.238801	0.701962	0.970715	0.917223	0.176576	0.0535515	0.582162	1.0635e-62	0.184099	0.145691	0.186962	0.229347	0.869259	0.853493	0.994441	0.12405	0.388805	0.324328	0.377419
ID_C1S3	0.316515	0.0487523	0.257315	0.118142	0.366102	0.105942	0.194871	0.619887	0.384024	0.936111	0.152322	0.117168	0.317513	0.659279	0.757792	0.0286787	0.972573	0.497486	0.690589	0.207819	0.957715	0.00627255	0.624153	0.39747	0.606512	0.245123	0.620043	0.623373	0.57452	0.111832	0.285048	0.304754	0.760155	0.595635	0.460757	0.310636	0.399551	0.184099	0	0.25225	0.315653	0.12792	0.416103	0.881134	0.764719	0.794241	0.00719706	0.814666	0.48631
FW_C1S3	0.27053	0.00323479	0.987009	0.0332807	0.544444	0.000150805	0.000126397	0.581678	0.876782	0.0862867	0.661417	0.206399	0.672634	0.829545	0.749649	0.246387	0.260799	0.386471	0.0218726	0.633764	0.404715	0.1618	0.0268921	0.211584	0.234209	0.785321	0.0801072	0.231608	0.245899	0.3787	0.703519	0.528876	0.676157	0.881562	0.302463	0.00842632	0.676699	0.145691	0.25225	0	1.16795e-05	0.223962	0.700585	0.16314	0.155933	0.981981	0.299736	0.830836	0.333446
DW_C1S3	0.33901	0.00583164	0.931312	0.0221216	0.895807	0.000100565	3.03498e-05	0.719757	0.953026	0.0360829	0.441556	0.36947	0.68887	0.921907	0.548325	0.395649	0.229814	0.400275	0.0391402	0.775167	0.467543	0.287814	0.0174311	0.147821	0.178127	0.745112	0.078274	0.0940368	0.237417	0.56217	0.582159	0.402246	0.977822	0.788587	0.345436	0.018658	0.614007	0.186962	0.315653	1.16795e-05	6.6469e-64	0.341761	0.547907	0.0584952	0.102178	0.821095	0.33202	0.767073	0.30691
LCP_C1S3	0.242126	0.485333	0.0542181	0.546469	0.0917066	0.471024	0.377628	0.166494	0.112294	0.347881	0.859848	0.0393012	0.331623	0.0408646	0.427115	0.142464	0.500249	0.736393	0.796862	0.404373	0.426138	0.699528	0.60364	0.939554	0.0384657	0.529147	0.652414	0.433588	0.175745	0.818318	0.685256	0.86295	0.711304	0.551369	0.384033	0.585947	0.20399	0.229347	0.12792	0.223962	0.341761	6.6469e-64	0.501194	0.472474	0.62294	0.0975733	0.649259	0.241225	0.924243
LCF_C1S3	0.428881	0.95098	0.83173	0.489259	0.231079	0.57023	0.584879	0.435238	0.763097	0.832238	0.498166	0.305489	0.298653	0.715363	0.131016	0.0859278	0.6264	0.983975	0.590837	0.436555	0.491989	0.895354	0.126236	0.493528	0.0847332	0.417742	0.494939	0.239604	0.662799	0.216168	0.732796	0.259863	0.529896	0.866655	0.775926	0.43538	0.622767	0.869259	0.416103	0.700585	0.547907	0.501194	6.6469e-64	0.8938	0.331142	0.639575	0.248138	0.702431	0.0687131
LADF_C1S3	0.681252	0.392592	0.77526	0.142112	0.439479	0.181714	0.0924431	0.603376	0.16586	4.16379e-05	0.00653118	0.982203	0.773289	0.613637	0.506886	0.459122	0.208311	0.679143	0.967581	0.343745	0.441443	0.548987	0.588343	0.611242	0.0931853	0.71194	0.0117172	0.0417397	0.385964	0.524565	0.0795572	0.95531	0.425809	0.818682	0.538416	0.713948	0.838419	0.853493	0.881134	0.16314	0.0584952	0.472474	0.8938	0	0.00353841	0.486875	0.868771	0.501434	0.524887
LNDF_C1S3	0.490713	0.424307	0.87271	0.0400383	0.840259	0.265805	0.172496	0.968059	0.394806	4.0945e-05	0.00229135	0.899568	0.5358	0.895061	0.549063	0.404716	0.0372411	0.605565	0.734585	0.294551	0.831323	0.963398	0.936797	0.897161	0.502934	0.519179	0.00278471	0.0314284	0.596553	0.383137	0.11021	0.51939	0.630457	0.974097	0.595671	0.479945	0.462581	0.994441	0.764719	0.155933	0.102178	0.62294	0.331142	0.00353841	0	0.79312	0.787019	0.827328	0.660739
LMois_C1S3	0.374177	0.401498	0.374744	0.657038	0.120589	0.423603	0.426848	0.0587975	0.758716	0.818947	0.458018	0.035894	0.146942	0.963556	0.602635	0.221649	0.346174	0.647871	0.693795	0.905378	0.932004	0.939548	0.977743	0.882401	0.565434	0.768541	0.25305	0.125997	0.0828208	0.559966	0.38126	0.86427	0.430329	0.355139	0.171238	0.891418	0.449693	0.12405	0.794241	0.981981	0.821095	0.0975733	0.639575	0.486875	0.79312	1.0635e-62	0.573619	0.645054	0.312683
SCP_C1S3	0.947544	0.10891	0.744713	0.185174	0.804932	0.0885776	0.20301	0.276454	0.24772	0.952182	0.23384	0.132065	0.00615405	0.607482	0.828094	0.163533	0.340828	0.830681	0.628159	0.865954	0.856513	0.0270363	0.492149	0.403929	0.914423	0.532601	0.312718	0.813681	0.394355	0.0110163	0.18761	0.284261	0.443938	0.349585	0.672586	0.647174	0.425075	0.388805	0.00719706	0.299736	0.33202	0.649259	0.248138	0.868771	0.787019	0.573619	6.6469e-64	0.435925	0.638169
SCF_C1S3	0.383297	0.773325	0.063074	0.829922	0.975328	0.742471	0.480673	0.606938	0.474313	0.525006	0.413554	0.326968	0.312338	0.000777693	0.65702	0.857664	0.354803	0.845079	0.474026	0.0239864	0.148452	0.631853	0.846837	0.611061	0.104881	0.155453	0.952378	0.989813	0.889044	0.789046	0.0168807	0.534688	0.80961	0.321088	0.776482	0.951034	0.0574423	0.324328	0.814666	0.830836	0.767073	0.241225	0.702431	0.501434	0.827328	0.645054	0.435925	0	0.888595
SADF_C1S3	0.293716	0.709108	0.934705	0.902804	0.622898	0.35491	0.422881	0.756817	0.173794	0.781697	0.513317	0.340261	0.502218	0.465851	0.000708489	0.0475096	0.758834	0.596563	0.49412	0.249036	0.4683	0.240062	0.107763	0.285702	0.667547	0.422202	0.475091	0.540005	0.77497	0.324318	0.554058	0.282628	0.863754	0.502536	0.222676	0.710543	0.603394	0.377419	0.48631	0.333446	0.30691	0.924243	0.0687131	0.524887	0.660739	0.312683	0.638169	0.888595	0
SNDF_C1S3	0.141021	0.495771	0.061031	0.789682	0.948714	0.543441	0.730789	0.709574	0.319163	0.858797	0.684563	0.185146	0.667455	0.246788	0.135697	0.0626212	0.88966	0.183926	0.373756	0.779598	0.847767	0.239536	0.546942	0.953972	0.576241	0.0943398	0.921132	0.546845	0.424179	0.765561	0.164622	0.588087	0.0462796	0.604703	0.182377	0.55893	0.276589	0.760535	0.920205	0.266246	0.404035	0.908843	0.466838	0.677157	0.873698	0.443965	0.655905	0.218159	0.130369
SMois_C1S3	0.0226605	0.060292	0.354802	0.497064	0.218489	0.202623	0.336484	0.185406	0.600166	0.371527	0.0592296	0.333707	0.624537	0.689746	0.266036	0.00317111	0.489484	0.0656596	0.356183	0.027147	0.767101	0.00399986	0.506439	0.752658	0.763114	0.375294	0.632416	0.411103	0.699246	0.236277	0.206733	0.931141	0.402065	0.145657	0.0450453	0.150186	0.300716	0.286662	0.00564449	0.286381	0.440173	0.350314	0.531405	0.239624	0.316319	0.640856	0.18549	0.680355	0.154797
[truncated: 2 more columns]
