# Supplementary material
Source: MDPI journal article supplement (https://www.mdpi.com/2071-1050/15/14/11446)
Supplement: s1 [file s1 › Supplementary Table S8.xlsx]

## Sheet: CORR_MAT
Supplementary Table S8 Correlation Matrix for the cutting 3 x spacing 1, 2, and 3 during second growing season (year 2) for all the 17 traits of 10 Quinoa genotypes
Note: This file has 2 sheets; the first sheet is correlation matrix and the second sheet contains p-values (<0.05 and <0.01). In p-values: the red ones are significant at <0.05 and green at <0.01).
	PH_C3S1	NoL_C3S1	LA_C3S1	Br_C3S1	ID_C3S1	FW_C3S1	DW_C3S1	LCP_C3S1	LCF_C3S1	LADF_C3S1	LNDF_C3S1	LMois_C3S1	SCP_C3S1	SCF_C3S1	SADF_C3S1	SNDF_C3S1	SMois_C3S1	PH_C3S2	NoL_C3S2	LA_C3S2	Br_C3S2	ID_C3S2	FW_C3S2	DW_C3S2	LCP_C3S2	LCF_C3S2	LADF_C3S2	LNDF_C3S2	LMois_C3S2	SCP_C3S2	SCF_C3S2	SADF_C3S2	SNDF_C3S2	SMois_C3S2	PH_C3S3	NoL_C3S3	LA_C3S3	Br_C3S3	ID_C3S3	FW_C3S3	DW_C3S3	LCP_C3S3	LCF_C3S3	LADF_C3S3	LNDF_C3S3	LMois_C3S3	SCP_C3S3	SCF_C3S3	SADF_C3S3
PH_C3S1
NoL_C3S1	0.619401
LA_C3S1	0.591667	0.424988
Br_C3S1	0.582873	0.904667	0.272431
ID_C3S1	0.565682	0.779288	0.184736	0.796361
FW_C3S1	0.578315	0.894654	0.362579	0.84883	0.813763
DW_C3S1	0.569744	0.910895	0.352643	0.835042	0.844883	0.989204
LCP_C3S1	0.642436	0.25144	0.413521	0.241233	0.240508	0.0395809	0.0752242
LCF_C3S1	-0.445671	-0.441991	-0.231722	-0.552205	-0.339205	-0.335388	-0.372964	-0.546197
LADF_C3S1	-0.304099	-0.217581	-0.757939	0.0170258	-0.261835	-0.242365	-0.272134	-0.246046	-0.0210202
LNDF_C3S1	-0.494137	-0.563777	-0.796771	-0.50057	-0.337138	-0.396103	-0.377336	-0.386844	0.348266	0.629009
LMois_C3S1	0.137359	0.35509	0.404821	0.229407	-0.0396018	0.192652	0.187348	-0.288524	-0.0629924	-0.139011	-0.4966
SCP_C3S1	-0.123567	-0.113026	-0.178676	0.267596	0.0361725	-0.13661	-0.168846	0.030833	-0.295883	0.475832	0.0358952	-0.0839879
SCF_C3S1	-0.485282	0.0395205	-0.269457	-0.0249263	-0.238482	0.0182058	-0.0367591	-0.421524	0.381045	0.173674	-0.0180692	0.0490612	-0.264293
SADF_C3S1	-0.132342	0.240654	-0.309919	0.284933	0.0423092	0.094	0.106681	-0.45486	-0.104584	0.508198	0.0549229	0.688254	0.237311	0.0886689
SNDF_C3S1	0.398974	0.101172	-0.0848508	0.152401	-0.0388985	0.133337	0.0501001	0.150993	0.237532	0.422472	0.192559	-0.161099	-0.0574592	0.156784	-0.0631806
SMois_C3S1	0.13006	-0.494877	0.0832656	-0.356104	-0.223858	-0.200726	-0.23761	0.186703	-0.136797	-0.130453	0.227064	-0.513792	0.0617793	-0.438691	-0.627955	0.0446367
PH_C3S2	0.986473	0.668997	0.541519	0.591917	0.614664	0.636185	0.636881	0.622971	-0.42172	-0.312567	-0.445579	0.0925701	-0.235581	-0.41912	-0.146778	0.407015	0.0855426
NoL_C3S2	0.546492	0.930187	0.410091	0.755862	0.757197	0.862286	0.901211	0.31947	-0.387771	-0.352269	-0.453996	0.11597	-0.316375	0.0745728	-0.0264058	0.0362614	-0.38396	0.635112
LA_C3S2	0.551024	0.385425	0.973346	0.287496	0.127996	0.30507	0.273829	0.399926	-0.157509	-0.65641	-0.801948	0.394984	-0.0393238	-0.200072	-0.293399	0.0234073	0.0405016	0.481498	0.330183
Br_C3S2	0.699477	0.647618	0.421859	0.748711	0.837827	0.749188	0.761952	0.414647	-0.606191	-0.308717	-0.391325	-0.0848653	0.233002	-0.530852	-0.14958	-0.0626452	0.200812	0.692099	0.617499	0.36302
ID_C3S2	0.531023	0.406608	0.325138	0.426312	0.745327	0.592002	0.622315	0.20672	-0.173279	-0.370192	-0.0745466	-0.209451	0.0929884	-0.631626	-0.261203	-0.0436033	0.24801	0.541624	0.456058	0.260089	0.836681
FW_C3S2	0.544625	0.800948	0.366144	0.703749	0.78111	0.956506	0.961682	0.0901053	-0.283692	-0.347345	-0.279766	0.000140257	-0.27146	-0.031407	-0.128196	0.0969165	-0.0495602	0.624561	0.872125	0.276716	0.745131	0.677473
DW_C3S2	0.569762	0.748682	0.336299	0.679141	0.753711	0.928313	0.932687	0.139742	-0.343123	-0.294663	-0.207743	-0.0836099	-0.2323	-0.106353	-0.176997	0.131663	0.0669582	0.645685	0.830996	0.24281	0.776448	0.704704	0.98889
LCP_C3S2	0.496464	-0.016751	0.470687	-0.172914	0.0674013	-0.00225446	0.0247448	0.125847	0.144927	-0.428551	-0.125854	0.351769	-0.264242	-0.689492	-0.00577276	0.0352725	0.189581	0.454351	-0.0692706	0.399795	0.174594	0.428644	0.0273395	0.0297127
LCF_C3S2	-0.316351	-0.289012	-0.504024	-0.204872	-0.517084	-0.271249	-0.337775	-0.5501	0.377449	0.76913	0.496444	0.255656	0.119197	0.353064	0.563419	0.531315	-0.18832	-0.332681	-0.460639	-0.401315	-0.595028	-0.534898	-0.394191	-0.387545	-0.112406
LADF_C3S2	-0.523814	-0.401484	-0.73204	-0.392936	-0.264268	-0.174121	-0.160947	-0.620848	0.167451	0.430603	0.749641	-0.190859	-0.222912	0.20112	0.235849	-0.106185	0.194079	-0.450918	-0.317084	-0.823021	-0.354739	-0.2278	-0.104548	-0.0635945	-0.219243	0.426883
LNDF_C3S2	-0.455759	-0.474411	-0.510717	-0.500549	-0.235963	-0.255401	-0.214552	-0.329161	-0.012766	0.0610622	0.551139	-0.354545	-0.307783	0.0256958	-0.1175	-0.40156	0.438415	-0.389695	-0.289172	-0.655695	-0.216679	-0.132636	-0.107437	-0.0533449	-0.162158	-0.0252173	0.860011
LMois_C3S2	0.210403	9.03196e-05	0.569074	-0.294137	-0.41714	-0.118763	-0.0890004	0.155267	0.00183673	-0.330049	-0.158794	0.447391	-0.464209	-0.193827	-0.0537437	0.0264002	0.0316883	0.199868	0.0545275	0.502257	-0.221801	-0.123938	-0.0498093	-0.0477755	0.541846	0.0480123	-0.182198	-0.128054
SCP_C3S2	-0.0382814	0.0191537	0.159061	0.140373	-0.306466	0.0466235	-0.0846428	-0.286528	0.214379	0.178483	-0.328388	0.365807	0.162204	0.563909	0.157889	0.427629	-0.0986056	-0.10155	-0.180915	0.308602	-0.260759	-0.467311	-0.125466	-0.164998	-0.255942	0.511785	-0.192403	-0.412908	-0.0311769
SCF_C3S2	-0.721283	-0.703363	-0.169595	-0.867463	-0.713915	-0.616682	-0.610683	-0.419841	0.574288	-0.199462	0.31106	-0.134556	-0.424844	0.382505	-0.30968	-0.315703	0.186993	-0.694489	-0.507548	-0.200525	-0.744891	-0.490278	-0.469696	-0.487958	-0.0868369	0.0952954	0.412234	0.535979	0.260096	0.00829281
SADF_C3S2	-0.307827	0.0679955	-0.172614	0.0426149	0.083743	-0.202501	-0.110952	-0.139644	-0.0941389	0.10392	-0.0437458	0.423454	0.292772	-0.163593	0.634908	-0.577956	-0.633928	-0.32843	-0.0488218	-0.181512	-0.119815	-0.0916145	-0.311741	-0.375488	0.0587135	-0.0339174	-0.0622809	-0.106277	-0.044175	-0.356881	-0.0874256
SNDF_C3S2	-0.0462783	-0.554661	-0.143649	-0.521829	-0.108084	-0.510887	-0.477002	0.404657	0.0592675	-0.274368	0.153517	-0.636345	-0.105943	-0.32239	-0.627226	-0.20897	0.553915	-0.051758	-0.37851	-0.193394	-0.0478826	0.0598527	-0.355633	-0.304239	0.130316	-0.467558	0.0484633	0.4235	-0.206243	-0.457659	0.319661	-0.14661
SMois_C3S2	0.575456	-0.172566	0.423757	-0.151396	-0.213448	-0.222627	-0.261997	0.698031	-0.0969039	-0.14028	-0.16872	-0.220991	-0.0223055	-0.403135	-0.529049	0.52225	0.517208	0.509076	-0.161737	0.469496	0.0908986	0.0613557	-0.169169	-0.0974674	0.408875	-0.088501	-0.485356	-0.331966	0.373409	0.11257	-0.143439	-0.51691	0.381609
PH_C3S3	0.967654	0.671899	0.462975	0.643486	0.696126	0.648587	0.660899	0.655318	-0.520382	-0.257376	-0.389993	-0.000858097	-0.1171	-0.501723	-0.139959	0.333346	0.117803	0.980509	0.642542	0.39764	0.787624	0.623569	0.642024	0.675692	0.395453	-0.398731	-0.418844	-0.337046	0.0821964	-0.213504	-0.767553	-0.263996	-0.00209307	0.45391
NoL_C3S3	0.415076	0.942487	0.362394	0.824156	0.753974	0.879461	0.914582	0.169538	-0.457056	-0.282952	-0.486195	0.230063	-0.154854	0.124627	0.13759	-0.115628	-0.454358	0.488444	0.959704	0.292621	0.624024	0.405853	0.843244	0.792355	-0.183439	-0.416572	-0.266723	-0.268558	-0.0384552	-0.106779	-0.52246	0.0894565	-0.503298	-0.354784	0.515052
LA_C3S3	0.595625	0.586496	0.935469	0.491036	0.280661	0.566342	0.532551	0.281209	-0.25784	-0.571515	-0.75534	0.440176	-0.0529102	-0.142949	-0.173353	0.0626259	-0.0115343	0.551657	0.524644	0.941021	0.503983	0.364733	0.528279	0.497648	0.310743	-0.341808	-0.694443	-0.610929	0.461774	0.319249	-0.329339	-0.22932	-0.424964	0.29871	0.480763	0.517506
Br_C3S3	0.683687	0.819617	0.554578	0.871681	0.742162	0.894897	0.856258	0.272502	-0.493766	-0.335362	-0.647357	0.161812	0.0676676	-0.0607502	-0.0741501	0.116954	-0.0146445	0.685786	0.742056	0.537947	0.829521	0.534639	0.820641	0.806246	-0.0298078	-0.405951	-0.437176	-0.396561	-0.156018	0.222042	-0.675529	-0.302762	-0.354653	0.039667	0.700119	0.769241	0.71604
ID_C3S3	0.297609	0.483897	-0.0470219	0.591644	0.775921	0.606405	0.637696	0.321885	-0.420722	-0.0603364	0.0101565	-0.555997	0.193624	-0.190371	-0.302495	-0.0411171	0.117671	0.357996	0.604921	-0.0906726	0.76768	0.690748	0.688112	0.726303	-0.301495	-0.550806	-0.0703827	0.0390336	-0.521811	-0.429663	-0.509937	-0.144209	0.0938258	-0.147615	0.495666	0.594515	0.068998	0.56947
FW_C3S3	0.430163	0.854637	0.263158	0.819354	0.811872	0.981337	0.976435	-0.0435394	-0.312975	-0.224139	-0.334404	0.117125	-0.117982	0.105768	0.0802799	0.0298339	-0.219054	0.500454	0.853132	0.201902	0.714747	0.566237	0.952919	0.920752	-0.13829	-0.300712	-0.0838886	-0.152677	-0.219661	0.00808537	-0.532944	-0.164214	-0.4891	-0.363634	0.530108	0.895989	0.475532	0.854313	0.669344
DW_C3S3	0.433014	0.853018	0.273769	0.81573	0.814769	0.978426	0.977768	-0.0178116	-0.334841	-0.235456	-0.329399	0.094608	-0.112457	0.0813076	0.0557451	0.0122874	-0.201653	0.503726	0.862556	0.208703	0.731364	0.5856	0.9596	0.931121	-0.137995	-0.330257	-0.091633	-0.145001	-0.207524	-0.0250926	-0.53213	-0.161758	-0.473897	-0.353994	0.538341	0.903071	0.481601	0.853406	0.69247	0.998758
LCP_C3S3	0.0270976	-0.348411	-0.158966	-0.409953	-0.00393661	-0.295337	-0.287879	-0.159159	0.689861	-0.0815838	0.301972	-0.0661319	-0.17063	-0.293964	-0.0298801	0.209321	0.0152811	0.0201205	-0.363684	-0.140102	-0.204947	0.226643	-0.259768	-0.281521	0.63234	0.141228	0.0243076	-0.0594313	-0.0254073	-0.2096	0.136058	0.0996305	0.35602	0.175162	-0.0169953	-0.489906	-0.29278	-0.410887	-0.259674	-0.350295	-0.364956
LCF_C3S3	0.0691543	0.282378	-0.474295	0.33183	0.643225	0.503227	0.51239	-0.244781	0.0262948	0.112588	0.284281	-0.336493	-0.171023	0.106677	0.071146	0.057638	-0.0252225	0.170732	0.339155	-0.55073	0.360467	0.395228	0.528793	0.527795	-0.194937	-0.0874507	0.486908	0.397632	-0.662959	-0.272873	-0.247023	-0.133591	0.0811172	-0.456157	0.246682	0.334751	-0.371127	0.281907	0.607843	0.57309	0.561711	0.145362
LADF_C3S3	-0.211115	-0.126928	-0.699072	0.0464673	-0.100138	-0.208673	-0.168223	-0.0339642	-0.328698	0.857438	0.629788	-0.169545	0.436969	-0.157484	0.503247	0.104579	-0.0980233	-0.203573	-0.195582	-0.686772	-0.0996233	-0.164311	-0.257301	-0.185297	-0.294062	0.453215	0.450321	0.229059	-0.219806	-0.288879	-0.277386	0.344132	-0.129746	-0.193713	-0.0912327	-0.13016	-0.593631	-0.341685	0.128295	-0.182378	-0.17468	-0.153761	0.138209
LNDF_C3S3	-0.43523	-0.397219	-0.554133	-0.192301	-0.20737	-0.503281	-0.489782	-0.277262	0.248133	0.617709	0.452021	0.0170418	0.650432	-0.169904	0.499341	-0.0244414	-0.266302	-0.499968	-0.565428	-0.436025	-0.311238	-0.139953	-0.610599	-0.610697	-0.0184259	0.453253	0.0920411	-0.14412	-0.312796	-0.0737903	-0.0749229	0.621356	-0.0303838	-0.206964	-0.428168	-0.467707	-0.523202	-0.547857	-0.207773	-0.48256	-0.488993	0.398231	-0.113619	0.581687
LMois_C3S3	-0.0246482	0.0557973	0.380081	-0.0987918	-0.221476	-0.0677559	-0.0750488	-0.389494	0.271854	-0.245614	-0.37583	0.911565	-0.145466	0.0124405	0.532121	-0.18963	-0.414532	-0.0815335	-0.143087	0.386684	-0.286847	-0.220952	-0.211376	-0.302449	0.516099	0.266548	-0.180709	-0.310563	0.492281	0.329342	0.137114	0.419174	-0.426298	-0.146041	-0.19752	-0.0654246	0.33501	-0.0991909	-0.732004	-0.13986	-0.163443	0.251722	-0.42737	-0.324827	0.139833
SCP_C3S3	-0.078823	0.00313602	-0.308802	0.149315	-0.188996	0.107373	-0.0117733	-0.357878	0.342873	0.583046	0.203473	-0.00534007	0.123335	0.591727	0.189338	0.761748	-0.106783	-0.0783574	-0.127808	-0.161197	-0.27714	-0.343874	-0.00737055	-0.00975319	-0.384972	0.747593	0.148326	-0.24526	-0.2483	0.770358	-0.0972372	-0.465516	-0.455394	0.0344219	-0.148358	-0.118309	-0.0602557	0.0858413	-0.157196	0.0902802	0.0584141	-0.0432853	0.127827	0.112556	0.0898872	-0.0595233
SCF_C3S3	-0.731812	-0.227498	-0.696298	-0.181963	-0.222768	-0.221766	-0.248208	-0.511951	0.460925	0.433681	0.362099	-0.230166	-0.0179334	0.839489	0.159605	0.0424387	-0.394622	-0.665817	-0.181454	-0.617729	-0.5835	-0.560322	-0.250561	-0.302259	-0.753437	0.394737	0.429156	0.23335	-0.520046	0.266899	0.398441	0.0710702	-0.0769124	-0.557195	-0.669065	-0.109217	-0.594646	-0.356603	-0.0602095	-0.0876242	-0.107791	-0.0627843	0.30735	0.177259	0.249572	-0.193419	0.491059
SADF_C3S3	-0.41807	-0.0212563	-0.57943	0.0455964	-0.0370384	-0.104924	-0.0605526	-0.551186	-0.0300246	0.588183	0.386146	0.400257	0.290623	0.0172537	0.895861	-0.255594	-0.495229	-0.414061	-0.191538	-0.587338	-0.233835	-0.212871	-0.244013	-0.268414	-0.0988445	0.504097	0.487334	0.187216	-0.17828	-0.137234	-0.103203	0.72509	-0.407893	-0.676004	-0.353531	-0.0191347	-0.480529	-0.33865	-0.185695	-0.0586791	-0.0717684	0.0404687	0.177392	0.678504	0.660707	0.317761	0.025175	0.28903
SNDF_C3S3	0.551045	0.326224	0.133484	0.242113	0.0899452	0.258638	0.216811	0.506814	-0.0419447	0.107787	-0.0732296	-0.231686	-0.356156	0.215876	-0.298715	0.819705	0.00846803	0.603322	0.387068	0.166963	0.0561185	-0.0629341	0.286254	0.314054	-0.0681666	0.126793	-0.239246	-0.323007	0.166792	0.224986	-0.285591	-0.619686	-0.0593642	0.5776	0.527995	0.185397	0.19847	0.273132	0.130052	0.167399	0.163306	-0.0766849	0.0444411	-0.049076	-0.439797	-0.349816	0.465674	-0.0339619	-0.513628
SMois_C3S3	0.571782	0.165676	0.571932	0.11716	0.353636	0.155343	0.159366	0.392957	-0.182734	-0.712181	-0.650011	0.203109	-0.197634	-0.432711	-0.241519	-0.226621	0.231771	0.526526	0.115339	0.499469	0.424152	0.327029	0.133753	0.109915	0.569417	-0.586762	-0.425486	-0.113618	0.0516404	-0.0818198	-0.183354	-0.0561793	0.437956	0.354163	0.501082	0.0533858	0.36494	0.368566	-0.0157017	0.0724912	0.067738	0.264897	0.0201432	-0.602464	-0.364125	0.256174	-0.462981	-0.56939	-0.41298
[truncated: 2 more columns]

## Sheet: P_VALUES
	PH_C3S1	NoL_C3S1	LA_C3S1	Br_C3S1	ID_C3S1	FW_C3S1	DW_C3S1	LCP_C3S1	LCF_C3S1	LADF_C3S1	LNDF_C3S1	LMois_C3S1	SCP_C3S1	SCF_C3S1	SADF_C3S1	SNDF_C3S1	SMois_C3S1	PH_C3S2	NoL_C3S2	LA_C3S2	Br_C3S2	ID_C3S2	FW_C3S2	DW_C3S2	LCP_C3S2	LCF_C3S2	LADF_C3S2	LNDF_C3S2	LMois_C3S2	SCP_C3S2	SCF_C3S2	SADF_C3S2	SNDF_C3S2	SMois_C3S2	PH_C3S3	NoL_C3S3	LA_C3S3	Br_C3S3	ID_C3S3	FW_C3S3	DW_C3S3	LCP_C3S3	LCF_C3S3	LADF_C3S3	LNDF_C3S3	LMois_C3S3	SCP_C3S3	SCF_C3S3	SADF_C3S3
PH_C1S1	6.6469e-64	0.0561614	0.0715793	0.076988	0.0883099	0.0798923	0.0855439	0.0451671	0.196747	0.392962	0.146587	0.705131	0.733787	0.155097	0.715519	0.253405	0.720258	1.44105e-07	0.102147	0.0987633	0.0243583	0.114246	0.103563	0.0855321	0.1444	0.373178	0.120177	0.185582	0.559583	0.916382	0.0185561	0.38689	0.898983	0.0817503	4.60598e-06	0.232947	0.069228	0.0292649	0.403642	0.214658	0.211298	0.940768	0.849446	0.558223	0.208707	0.946115	0.828642	0.0161316	0.229251
NoL_C1S1	0.0561614	0	0.220835	0.000321654	0.00787714	0.000473662	0.000247389	0.483449	0.200916	0.545942	0.0896262	0.313994	0.755889	0.913684	0.503012	0.780938	0.14589	0.0343985	9.54679e-05	0.271361	0.0429102	0.243585	0.00535988	0.0127209	0.963368	0.417999	0.250152	0.165943	0.999802	0.958117	0.023244	0.851946	0.0961002	0.633554	0.0333395	4.4644e-05	0.0747287	0.00370271	0.156455	0.00163289	0.00170336	0.323824	0.42924	0.726775	0.255692	0.878323	0.99314	0.527314	0.953523
LA_C1S1	0.0715793	0.220835	0	0.446353	0.609401	0.303161	0.317577	0.234881	0.519459	0.0110821	0.00579273	0.245864	0.621387	0.451528	0.383502	0.815719	0.819114	0.105944	0.239178	2.13844e-06	0.224619	0.3593	0.298073	0.342052	0.16976	0.137429	0.0160818	0.131435	0.0859967	0.660724	0.639498	0.633458	0.692172	0.22232	0.177829	0.303426	7.01484e-05	0.0961603	0.897367	0.462577	0.444033	0.660917	0.166061	0.0244768	0.0964839	0.278629	0.385309	0.0252969	0.0791755
Br_C1S1	0.076988	0.000321654	0.446353	0	0.0058365	0.00189585	0.00264124	0.501953	0.0978937	0.962767	0.140588	0.523758	0.454781	0.945507	0.424895	0.67426	0.312516	0.0714293	0.0114361	0.420557	0.0127156	0.219245	0.0231352	0.0307935	0.632858	0.570184	0.261323	0.140608	0.409412	0.698914	0.00114692	0.906949	0.121843	0.676308	0.0447036	0.00336341	0.149534	0.00101311	0.0715931	0.00372305	0.00401219	0.239351	0.348908	0.898572	0.594556	0.78599	0.680559	0.614875	0.900465
ID_C1S1	0.0883099	0.00787714	0.609401	0.0058365	0	0.0041757	0.0020912	0.503279	0.337632	0.464914	0.340773	0.913507	0.920976	0.506992	0.907614	0.915038	0.534122	0.0586225	0.0112077	0.724551	0.00247614	0.0133546	0.00763837	0.0118109	0.853228	0.125884	0.460622	0.511622	0.230395	0.389102	0.0203956	0.818091	0.76631	0.553779	0.0253484	0.0117646	0.432173	0.0139723	0.00833233	0.00433736	0.0040915	0.991389	0.0448185	0.783132	0.565388	0.538594	0.601025	0.536166	0.91909
FW_C1S1	0.0798923	0.000473662	0.303161	0.00189585	0.0041757	0	5.86686e-08	0.913552	0.343444	0.499886	0.257153	0.59387	0.706681	0.960188	0.796182	0.713457	0.57818	0.0479942	0.00132815	0.391376	0.0126273	0.0713781	1.48542e-05	0.000105894	0.995068	0.448406	0.63045	0.47635	0.743839	0.898232	0.0575651	0.574751	0.131284	0.536431	0.0424967	0.000796602	0.0878562	0.000469441	0.0630811	5.18977e-07	9.2347e-07	0.407414	0.138154	0.562891	0.138105	0.852463	0.76781	0.53805	0.772989
DW_C1S1	0.0855439	0.000247389	0.317577	0.00264124	0.0020912	5.86686e-08	0	0.836375	0.288471	0.446867	0.282403	0.60426	0.640999	0.919698	0.769273	0.890681	0.508593	0.0476735	0.0003693	0.44393	0.0104201	0.0546817	9.00455e-06	8.27669e-05	0.945904	0.339803	0.656907	0.551683	0.806846	0.816165	0.0607446	0.760258	0.163318	0.464628	0.0374739	0.00020987	0.113013	0.00156445	0.0473003	1.31127e-06	1.04057e-06	0.419911	0.129962	0.64225	0.150737	0.836752	0.974249	0.489277	0.868026
LCP_C1S1	0.0451671	0.483449	0.234881	0.501953	0.503279	0.913552	0.836375	0	0.10237	0.493192	0.269449	0.418823	0.932617	0.225026	0.186561	0.67713	0.605529	0.0543523	0.368222	0.252168	0.233481	0.566634	0.804487	0.700214	0.729029	0.0994476	0.0554236	0.353034	0.668424	0.422192	0.227079	0.700416	0.246074	0.0247823	0.0396981	0.639613	0.431235	0.446229	0.364407	0.904938	0.961049	0.660526	0.495488	0.925789	0.438004	0.265897	0.309938	0.130347	0.0986441
LCF_C1S1	0.196747	0.200916	0.519459	0.0978937	0.337632	0.343444	0.288471	0.10237	0	0.954039	0.32404	0.86275	0.406506	0.277311	0.773708	0.508737	0.706293	0.224788	0.268203	0.663871	0.0631997	0.632129	0.427004	0.331719	0.689548	0.282248	0.643801	0.972079	0.995982	0.552011	0.0825168	0.795886	0.870807	0.790002	0.123067	0.184174	0.472	0.146938	0.226004	0.37858	0.344281	0.0272728	0.94252	0.353752	0.489412	0.447355	0.332095	0.180012	0.93438
LADF_C1S1	0.392962	0.545942	0.0110821	0.962767	0.464914	0.499886	0.446867	0.493192	0.954039	0	0.051382	0.701723	0.1645	0.631341	0.133672	0.223875	0.71944	0.379235	0.318128	0.0392559	0.385446	0.292354	0.325408	0.408535	0.216572	0.00930621	0.214137	0.866923	0.351658	0.621769	0.580626	0.775114	0.442996	0.699105	0.472826	0.428262	0.0843562	0.343484	0.868494	0.533594	0.512558	0.822719	0.756812	0.00151597	0.0570325	0.493975	0.0768789	0.210516	0.0736914
LNDF_C1S1	0.146587	0.0896262	0.00579273	0.140588	0.340773	0.257153	0.282403	0.269449	0.32404	0.051382	0	0.144272	0.92158	0.960487	0.880218	0.594051	0.528124	0.196851	0.187505	0.00525972	0.263459	0.837833	0.433705	0.564671	0.729014	0.144418	0.0125438	0.0986783	0.661264	0.354233	0.38166	0.904489	0.671984	0.641253	0.265231	0.154206	0.0115263	0.043022	0.977785	0.344951	0.352665	0.396448	0.426001	0.0510068	0.189675	0.284486	0.572877	0.303849	0.270388
LMois_C1S1	0.705131	0.313994	0.245864	0.523758	0.913507	0.59387	0.60426	0.418823	0.86275	0.701723	0.144272	0	0.817567	0.892937	0.0277821	0.656601	0.128735	0.799229	0.749701	0.258623	0.815688	0.561402	0.999693	0.818377	0.318863	0.475894	0.597376	0.314791	0.194817	0.298553	0.71093	0.222686	0.0479202	0.539508	0.998123	0.522538	0.202991	0.655159	0.0951334	0.747275	0.794887	0.855968	0.341756	0.6396	0.962732	0.000240232	0.988319	0.522348	0.251739
SCP_C1S1	0.733787	0.755889	0.621387	0.454781	0.920976	0.706681	0.640999	0.932617	0.406506	0.1645	0.92158	0.817567	0	0.460578	0.509143	0.874722	0.865372	0.512327	0.373141	0.914112	0.51709	0.798338	0.448039	0.518389	0.460667	0.742929	0.535895	0.386961	0.176523	0.654367	0.221008	0.411692	0.770834	0.951231	0.747328	0.669263	0.884582	0.852653	0.591972	0.745478	0.757087	0.637426	0.636639	0.206687	0.0417168	0.688442	0.734272	0.960783	0.415292
SCF_C1S1	0.155097	0.913684	0.451528	0.945507	0.506992	0.960188	0.919698	0.225026	0.277311	0.631341	0.960487	0.892937	0.460578	6.6469e-64	0.807555	0.665341	0.204697	0.227962	0.837776	0.579445	0.114385	0.0501286	0.931365	0.769966	0.0273893	0.316959	0.577418	0.943828	0.591577	0.0895348	0.27532	0.651565	0.363612	0.248025	0.139529	0.731573	0.693612	0.867598	0.598331	0.771204	0.823311	0.4097	0.769282	0.663921	0.63888	0.972791	0.071543	0.00238122	0.962269
SADF_C1S1	0.715519	0.503012	0.383502	0.424895	0.907614	0.796182	0.769273	0.186561	0.773708	0.133672	0.880218	0.0277821	0.509143	0.807555	0	0.862343	0.0518923	0.685751	0.942278	0.410643	0.680016	0.466032	0.724134	0.624722	0.987373	0.0898751	0.511834	0.746489	0.882775	0.6631	0.383889	0.0485858	0.0522475	0.115851	0.699768	0.704656	0.631981	0.838685	0.39559	0.825515	0.878436	0.934696	0.845154	0.138136	0.141722	0.113359	0.600354	0.659623	0.000452999
SNDF_C1S1	0.253405	0.780938	0.815719	0.67426	0.915038	0.713457	0.890681	0.67713	0.508737	0.223875	0.594051	0.656601	0.874722	0.665341	0.862343	0	0.902551	0.243068	0.920782	0.948825	0.8635	0.904799	0.789975	0.716928	0.922937	0.11401	0.770322	0.250054	0.94229	0.21767	0.374211	0.080124	0.562321	0.121488	0.346574	0.750418	0.863542	0.747633	0.910208	0.934796	0.973125	0.561652	0.874335	0.77372	0.946566	0.599781	0.010453	0.907332	0.476004
SMois_C1S1	0.720258	0.14589	0.819114	0.312516	0.534122	0.57818	0.508593	0.605529	0.706293	0.71944	0.528124	0.128735	0.865372	0.204697	0.0518923	0.902551	0	0.814239	0.273343	0.911548	0.578013	0.489635	0.891853	0.854184	0.599878	0.602351	0.591085	0.205015	0.930751	0.786385	0.604958	0.0490432	0.0966429	0.125777	0.745852	0.187109	0.974772	0.967972	0.746129	0.543158	0.576388	0.96658	0.944861	0.787622	0.457047	0.233623	0.769057	0.259099	0.145559
PH_C1S2	1.44105e-07	0.0343985	0.105944	0.0714293	0.0586225	0.0479942	0.0476735	0.0543523	0.224788	0.379235	0.196851	0.799229	0.512327	0.227962	0.685751	0.243068	0.814239	6.6469e-64	0.0484911	0.158822	0.0265743	0.105863	0.0535596	0.0437431	0.187118	0.347596	0.190893	0.26563	0.57984	0.780136	0.0258422	0.354168	0.887082	0.132889	6.16814e-07	0.152025	0.098297	0.0285767	0.309767	0.140695	0.1377	0.956004	0.637222	0.572684	0.141143	0.822826	0.829642	0.0355848	0.234209
NoL_C1S2	0.102147	9.54679e-05	0.239178	0.0114361	0.0112077	0.00132815	0.0003693	0.368222	0.268203	0.318128	0.187505	0.749701	0.373141	0.837776	0.942278	0.920782	0.273343	0.0484911	0	0.351451	0.0571408	0.185257	0.000999706	0.00289507	0.849196	0.180317	0.372011	0.417731	0.881075	0.616948	0.134253	0.893456	0.280785	0.655312	0.0451204	1.09864e-05	0.119485	0.0139934	0.0639049	0.0016983	0.00131824	0.301578	0.337708	0.588158	0.0884845	0.693326	0.724943	0.615883	0.596046
LA_C1S2	0.0987633	0.271361	2.13844e-06	0.420557	0.724551	0.391376	0.44393	0.252168	0.663871	0.0392559	0.00525972	0.258623	0.914112	0.579445	0.410643	0.948825	0.911548	0.158822	0.351451	0	0.302529	0.468005	0.438943	0.499075	0.252338	0.25037	0.00344607	0.0395449	0.13904	0.385632	0.578569	0.615767	0.59242	0.170991	0.255142	0.411944	4.92834e-05	0.108726	0.803276	0.575907	0.562833	0.699472	0.0989806	0.0282576	0.207782	0.269665	0.656402	0.0570218	0.0742096
Br_C1S2	0.0243583	0.0429102	0.224619	0.0127156	0.00247614	0.0126273	0.0104201	0.233481	0.0631997	0.385446	0.263459	0.815688	0.51709	0.114385	0.680016	0.8635	0.578013	0.0265743	0.0571408	0.302529	0	0.00254316	0.0133922	0.00825984	0.629506	0.0695791	0.314507	0.547648	0.537984	0.466818	0.0134385	0.741634	0.895497	0.802794	0.00682663	0.0538266	0.137467	0.00299182	0.00952406	0.0201818	0.0162299	0.57004	0.306195	0.784224	0.381373	0.421653	0.438213	0.076594	0.515549
ID_C1S2	0.114246	0.243585	0.3593	0.219245	0.0133546	0.0713781	0.0546817	0.566634	0.632129	0.292354	0.837833	0.561402	0.798338	0.0501286	0.466032	0.904799	0.489635	0.105863	0.185257	0.468005	0.00254316	6.6469e-64	0.0313676	0.0228675	0.216461	0.111135	0.52675	0.71491	0.733013	0.173265	0.15026	0.801267	0.86954	0.866289	0.0540532	0.244547	0.300081	0.111342	0.0269947	0.0879288	0.0752832	0.528909	0.258302	0.650118	0.699779	0.53958	0.330592	0.0920462	0.554879
FW_C1S2	0.103563	0.00535988	0.298073	0.0231352	0.00763837	1.48542e-05	9.00455e-06	0.804487	0.427004	0.325408	0.433705	0.999693	0.448039	0.931365	0.724134	0.789975	0.891853	0.0535596	0.000999706	0.438943	0.0133922	0.0313676	0	6.57701e-08	0.940239	0.259666	0.773784	0.767676	0.891312	0.729824	0.170784	0.380564	0.313201	0.640352	0.04535	0.00217647	0.116482	0.00362411	0.0278274	2.0305e-05	1.10996e-05	0.468575	0.11606	0.472959	0.0607897	0.557726	0.983878	0.485031	0.496884
DW_C1S2	0.0855321	0.0127209	0.342052	0.0307935	0.0118109	0.000105894	8.27669e-05	0.700214	0.331719	0.408535	0.564671	0.818377	0.518389	0.769966	0.624722	0.716928	0.854184	0.0437431	0.00289507	0.499075	0.00825984	0.0228675	6.57701e-08	0	0.935061	0.268507	0.861448	0.88364	0.895729	0.648734	0.152495	0.284959	0.392733	0.788804	0.0319888	0.00627679	0.143294	0.0048447	0.0173708	0.000156684	9.05674e-05	0.430703	0.116879	0.608297	0.0607373	0.395665	0.978667	0.395976	0.453349
LCP_C1S2	0.1444	0.963368	0.16976	0.632858	0.853228	0.995068	0.945904	0.729029	0.689548	0.216572	0.729014	0.318863	0.460667	0.0273893	0.987373	0.922937	0.599878	0.187118	0.849196	0.252338	0.629506	0.216461	0.940239	0.935061	0	0.757196	0.542801	0.654461	0.105692	0.475382	0.81147	0.872006	0.719725	0.240711	0.258005	0.61196	0.382171	0.934853	0.397231	0.70321	0.703819	0.0497903	0.589414	0.409538	0.959707	0.126732	0.271973	0.0118593	0.785878
LCF_C1S2	0.373178	0.417999	0.137429	0.570184	0.125884	0.448406	0.339803	0.0994476	0.282248	0.00930621	0.144418	0.475894	0.742929	0.316959	0.0898751	0.11401	0.602351	0.347596	0.180317	0.25037	0.0695791	0.111135	0.259666	0.268507	0.757196	0	0.218562	0.944872	0.895215	0.130493	0.793424	0.925891	0.173007	0.807913	0.25372	0.231095	0.333698	0.244422	0.0989247	0.398518	0.351336	0.697152	0.810158	0.188362	0.18832	0.456617	0.0129243	0.258947	0.137363
LADF_C1S2	0.120177	0.250152	0.0160818	0.261323	0.460622	0.63045	0.656907	0.0554236	0.643801	0.214137	0.0125438	0.597376	0.535895	0.577418	0.511834	0.770322	0.591085	0.190893	0.372011	0.00344607	0.314507	0.52675	0.773784	0.861448	0.542801	0.218562	0	0.00141406	0.61441	0.594356	0.236488	0.864288	0.894235	0.155025	0.228299	0.45631	0.025856	0.206447	0.846798	0.81778	0.801227	0.946858	0.153513	0.191554	0.800357	0.617357	0.682581	0.215852	0.153099
LNDF_C1S2	0.185582	0.165943	0.131435	0.140608	0.511622	0.47635	0.551683	0.353034	0.972079	0.866923	0.0986783	0.314791	0.386961	0.943828	0.746489	0.250054	0.205015	0.26563	0.417731	0.0395449	0.547648	0.71491	0.767676	0.88364	0.654461	0.944872	0.00141406	0	0.72443	0.235645	0.110277	0.770127	0.22263	0.348698	0.340913	0.453098	0.0606118	0.256553	0.914744	0.673696	0.689396	0.870452	0.255152	0.524405	0.691205	0.382462	0.494618	0.516445	0.604521
LMois_C1S2	0.559583	0.999802	0.0859967	0.409412	0.230395	0.743839	0.806846	0.668424	0.995982	0.351658	0.661264	0.194817	0.176523	0.591577	0.882775	0.94229	0.930751	0.57984	0.881075	0.13904	0.537984	0.733013	0.891312	0.895729	0.105692	0.895215	0.61441	0.72443	0	0.931867	0.467993	0.903556	0.567549	0.287849	0.821405	0.916004	0.179106	0.666897	0.121858	0.542012	0.565091	0.944457	0.0366746	0.541741	0.378867	0.148347	0.489111	0.123352	0.622172
SCP_C1S2	0.916382	0.958117	0.660724	0.698914	0.389102	0.898232	0.816165	0.422192	0.552011	0.621769	0.354233	0.298553	0.654367	0.0895348	0.6631	0.21767	0.786385	0.780136	0.616948	0.385632	0.466818	0.173265	0.729824	0.648734	0.475382	0.130493	0.594356	0.235645	0.931867	0	0.981861	0.311384	0.183521	0.75685	0.553674	0.769065	0.368573	0.537531	0.215251	0.982314	0.945145	0.561117	0.445586	0.418224	0.83946	0.352754	0.00912445	0.456001	0.705391
SCF_C1S2	0.0185561	0.023244	0.639498	0.00114692	0.0203956	0.0575651	0.0607446	0.227079	0.0825168	0.580626	0.38166	0.71093	0.221008	0.27532	0.383889	0.374211	0.604958	0.0258422	0.134253	0.578569	0.0134385	0.15026	0.170784	0.152495	0.81147	0.793424	0.236488	0.110277	0.467993	0.981861	0	0.810211	0.36792	0.692603	0.0095434	0.121312	0.352758	0.032046	0.132125	0.112697	0.113352	0.707821	0.49142	0.437789	0.837023	0.705638	0.789293	0.254098	0.776632
SADF_C1S2	0.38689	0.851946	0.633458	0.906949	0.818091	0.574751	0.760258	0.700416	0.795886	0.775114	0.904489	0.222686	0.411692	0.651565	0.0485858	0.080124	0.0490432	0.354168	0.893456	0.615767	0.741634	0.801267	0.380564	0.284959	0.872006	0.925891	0.864288	0.770127	0.903556	0.311384	0.810211	1.0635e-62	0.686096	0.126034	0.461102	0.805872	0.52392	0.395152	0.691022	0.650313	0.655268	0.784209	0.712929	0.330205	0.055166	0.227895	0.175145	0.845317	0.0176521
SNDF_C1S2	0.898983	0.0961002	0.692172	0.121843	0.76631	0.131284	0.163318	0.246074	0.870807	0.442996	0.671984	0.0479202	0.770834	0.363612	0.0522475	0.562321	0.0966429	0.887082	0.280785	0.59242	0.895497	0.86954	0.313201	0.392733	0.719725	0.173007	0.894235	0.22263	0.567549	0.183521	0.36792	0.686096	6.6469e-64	0.27654	0.995421	0.13809	0.220864	0.314633	0.796553	0.151392	0.166466	0.312638	0.823719	0.72091	0.933597	0.219262	0.185979	0.832746	0.241954
SMois_C1S2	0.0817503	0.633554	0.22232	0.676308	0.553779	0.536431	0.464628	0.0247823	0.790002	0.699105	0.641253	0.539508	0.951231	0.248025	0.115851	0.121488	0.125777	0.132889	0.655312	0.170991	0.802794	0.866289	0.640352	0.788804	0.240711	0.807913	0.155025	0.348698	0.287849	0.75685	0.692603	0.126034	0.27654	6.6469e-64	0.1876	0.314441	0.401821	0.913365	0.684036	0.301651	0.315596	0.628375	0.185149	0.591799	0.566165	0.687263	0.924791	0.0942713	0.0318794
PH_C1S3	4.60598e-06	0.0333395	0.177829	0.0447036	0.0253484	0.0424967	0.0374739	0.0396981	0.123067	0.472826	0.265231	0.998123	0.747328	0.139529	0.699768	0.346574	0.745852	6.16814e-07	0.0451204	0.255142	0.00682663	0.0540532	0.04535	0.0319888	0.258005	0.25372	0.228299	0.340913	0.821405	0.553674	0.0095434	0.461102	0.995421	0.1876	1.0635e-62	0.127639	0.159552	0.0241718	0.145148	0.114989	0.108416	0.962833	0.492038	0.802081	0.217028	0.584392	0.682516	0.0343733	0.316274
NoL_C1S3	0.232947	4.4644e-05	0.303426	0.00336341	0.0117646	0.000796602	0.00020987	0.639613	0.184174	0.428262	0.154206	0.522538	0.669263	0.731573	0.704656	0.750418	0.187109	0.152025	1.09864e-05	0.411944	0.0538266	0.244547	0.00217647	0.00627679	0.61196	0.231095	0.45631	0.453098	0.916004	0.769065	0.121312	0.805872	0.13809	0.314441	0.127639	0	0.125521	0.00928966	0.0698821	0.000450858	0.000343048	0.150617	0.344419	0.72005	0.172852	0.857495	0.744791	0.763916	0.958158
LA_C1S3	0.069228	0.0747287	7.01484e-05	0.149534	0.432173	0.0878562	0.113013	0.431235	0.472	0.0843562	0.0115263	0.202991	0.884582	0.693612	0.631981	0.863542	0.974772	0.098297	0.119485	4.92834e-05	0.137467	0.300081	0.116482	0.143294	0.382171	0.333698	0.025856	0.0606118	0.179106	0.368573	0.352758	0.52392	0.220864	0.401821	0.159552	0.125521	0	0.0198527	0.849783	0.164803	0.15872	0.411677	0.291042	0.0704059	0.120689	0.344023	0.868668	0.0698043	0.159785
Br_C1S3	0.0292649	0.00370271	0.0961603	0.00101311	0.0139723	0.000469441	0.00156445	0.446229	0.146938	0.343484	0.043022	0.655159	0.852653	0.867598	0.838685	0.747633	0.967972	0.0285767	0.0139934	0.108726	0.00299182	0.111342	0.00362411	0.0048447	0.934853	0.244422	0.206447	0.256553	0.666897	0.537531	0.032046	0.395152	0.314633	0.913365	0.0241718	0.00928966	0.0198527	0	0.0857286	0.00164682	0.00168627	0.238176	0.430043	0.333883	0.101121	0.785142	0.8136	0.31179	0.338474
ID_C1S3	0.403642	0.156455	0.897367	0.0715931	0.00833233	0.0630811	0.0473003	0.364407	0.226004	0.868494	0.977785	0.0951334	0.591972	0.598331	0.39559	0.910208	0.746129	0.309767	0.0639049	0.803276	0.00952406	0.0269947	0.0278274	0.0173708	0.397231	0.0989247	0.846798	0.914744	0.121858	0.215251	0.132125	0.691022	0.796553	0.684036	0.145148	0.0698821	0.849783	0.0857286	0	0.0342707	0.0264599	0.468741	0.0622892	0.723928	0.564614	0.0160896	0.664505	0.868768	0.607512
FW_C1S3	0.214658	0.00163289	0.462577	0.00372305	0.00433736	5.18977e-07	1.31127e-06	0.904938	0.37858	0.533594	0.344951	0.747275	0.745478	0.771204	0.825515	0.934796	0.543158	0.140695	0.0016983	0.575907	0.0201818	0.0879288	2.0305e-05	0.000156684	0.70321	0.398518	0.81778	0.673696	0.542012	0.982314	0.112697	0.650313	0.151392	0.301651	0.114989	0.000450858	0.164803	0.00164682	0.0342707	6.6469e-64	1.0382e-11	0.321035	0.083308	0.614055	0.157772	0.699971	0.804114	0.809787	0.872081
DW_C1S3	0.211298	0.00170336	0.444033	0.00401219	0.0040915	9.2347e-07	1.04057e-06	0.961049	0.344281	0.512558	0.352665	0.794887	0.757087	0.823311	0.878436	0.973125	0.576388	0.1377	0.00131824	0.562833	0.0162299	0.0752832	1.10996e-05	9.05674e-05	0.703819	0.351336	0.801227	0.689396	0.565091	0.945145	0.113352	0.655268	0.166466	0.315596	0.108416	0.000343048	0.15872	0.00168627	0.0264599	1.0382e-11	0	0.299764	0.0910685	0.629335	0.151495	0.651868	0.872654	0.766927	0.843813
LCP_C1S3	0.940768	0.323824	0.660917	0.239351	0.991389	0.407414	0.419911	0.660526	0.0272728	0.822719	0.396448	0.855968	0.637426	0.4097	0.934696	0.561652	0.96658	0.956004	0.301578	0.699472	0.57004	0.528909	0.468575	0.430703	0.0497903	0.697152	0.946858	0.870452	0.944457	0.561117	0.707821	0.784209	0.312638	0.628375	0.962833	0.150617	0.411677	0.238176	0.468741	0.321035	0.299764	0	0.688655	0.671487	0.254371	0.482943	0.905491	0.863199	0.91162
LCF_C1S3	0.849446	0.42924	0.166061	0.348908	0.0448185	0.138154	0.129962	0.495488	0.94252	0.756812	0.426001	0.341756	0.636639	0.769282	0.845154	0.874335	0.944861	0.637222	0.337708	0.0989806	0.306195	0.258302	0.11606	0.116879	0.589414	0.810158	0.153513	0.255152	0.0366746	0.445586	0.49142	0.712929	0.823719	0.185149	0.492038	0.344419	0.291042	0.430043	0.0622892	0.083308	0.0910685	0.688655	0	0.703377	0.754642	0.217979	0.724903	0.387663	0.623937
LADF_C1S3	0.558223	0.726775	0.0244768	0.898572	0.783132	0.562891	0.64225	0.925789	0.353752	0.00151597	0.0510068	0.6396	0.206687	0.663921	0.138136	0.77372	0.787622	0.572684	0.588158	0.0282576	0.784224	0.650118	0.472959	0.608297	0.409538	0.188362	0.191554	0.524405	0.541741	0.418224	0.437789	0.330205	0.72091	0.591799	0.802081	0.72005	0.0704059	0.333883	0.723928	0.614055	0.629335	0.671487	0.703377	0	0.0777367	0.359787	0.756879	0.624201	0.0310121
LNDF_C1S3	0.208707	0.255692	0.0964839	0.594556	0.565388	0.138105	0.150737	0.438004	0.489412	0.0570325	0.189675	0.962732	0.0417168	0.63888	0.141722	0.946566	0.457047	0.141143	0.0884845	0.207782	0.381373	0.699779	0.0607897	0.0607373	0.959707	0.18832	0.800357	0.691205	0.378867	0.83946	0.837023	0.055166	0.933597	0.566165	0.217028	0.172852	0.120689	0.101121	0.564614	0.157772	0.151495	0.254371	0.754642	0.0777367	0	0.700026	0.804953	0.486814	0.0375491
LMois_C1S3	0.946115	0.878323	0.278629	0.78599	0.538594	0.852463	0.836752	0.265897	0.447355	0.493975	0.284486	0.000240232	0.688442	0.972791	0.113359	0.599781	0.233623	0.822826	0.693326	0.269665	0.421653	0.53958	0.557726	0.395665	0.126732	0.456617	0.617357	0.382462	0.148347	0.352754	0.705638	0.227895	0.219262	0.687263	0.584392	0.857495	0.344023	0.785142	0.0160896	0.699971	0.651868	0.482943	0.217979	0.359787	0.700026	0	0.870253	0.592372	0.370933
SCP_C1S3	0.828642	0.99314	0.385309	0.680559	0.601025	0.76781	0.974249	0.309938	0.332095	0.0768789	0.572877	0.988319	0.734272	0.071543	0.600354	0.010453	0.769057	0.829642	0.724943	0.656402	0.438213	0.330592	0.983878	0.978667	0.271973	0.0129243	0.682581	0.494618	0.489111	0.00912445	0.789293	0.175145	0.185979	0.924791	0.682516	0.744791	0.868668	0.8136	0.664505	0.804114	0.872654	0.905491	0.724903	0.756879	0.804953	0.870253	1.0635e-62	0.149513	0.944965
SCF_C1S3	0.0161316	0.527314	0.0252969	0.614875	0.536166	0.53805	0.489277	0.130347	0.180012	0.210516	0.303849	0.522348	0.960783	0.00238122	0.659623	0.907332	0.259099	0.0355848	0.615883	0.0570218	0.076594	0.0920462	0.485031	0.395976	0.0118593	0.258947	0.215852	0.516445	0.123352	0.456001	0.254098	0.845317	0.832746	0.0942713	0.0343733	0.763916	0.0698043	0.31179	0.868768	0.809787	0.766927	0.863199	0.387663	0.624201	0.486814	0.592372	0.149513	6.6469e-64	0.417969
SADF_C1S3	0.229251	0.953523	0.0791755	0.900465	0.91909	0.772989	0.868026	0.0986441	0.93438	0.0736914	0.270388	0.251739	0.415292	0.962269	0.000452999	0.476004	0.145559	0.234209	0.596046	0.0742096	0.515549	0.554879	0.496884	0.453349	0.785878	0.137363	0.153099	0.604521	0.622172	0.705391	0.776632	0.0176521	0.241954	0.0318794	0.316274	0.958158	0.159785	0.338474	0.607512	0.872081	0.843813	0.91162	0.623937	0.0310121	0.0375491	0.370933	0.944965	0.417969	1.0635e-62
SNDF_C1S3	0.0987477	0.357603	0.713152	0.500347	0.804829	0.470582	0.547398	0.13491	0.908407	0.766937	0.840666	0.519528	0.31244	0.549171	0.401812	0.00369589	0.981478	0.0648009	0.269148	0.64478	0.877627	0.862876	0.422657	0.37685	0.851576	0.727056	0.50559	0.362642	0.645124	0.532008	0.423779	0.0560154	0.870598	0.0803548	0.116714	0.608099	0.582547	0.445137	0.720275	0.643906	0.652143	0.833235	0.902977	0.892904	0.203426	0.321744	0.17498	0.925794	0.128878
SMois_C1S3	0.0841778	0.64737	0.084078	0.747202	0.316121	0.668269	0.660107	0.261295	0.613352	0.0208462	0.0418939	0.573579	0.58417	0.211653	0.501431	0.528952	0.51937	0.117924	0.751026	0.141604	0.221843	0.356348	0.712593	0.762446	0.0857645	0.0745642	0.220237	0.754643	0.887337	0.822213	0.612128	0.877495	0.205545	0.315349	0.140117	0.883551	0.299787	0.294645	0.965661	0.842256	0.852501	0.459516	0.955955	0.065285	0.300949	0.474968	0.177823	0.0857827	0.235555
[truncated: 2 more columns]
